# Supplementary material for: Precise measurements of capsule mechanical properties using indentation
Source: Royal Society of Chemistry journal article supplement (doi:10.1039/c6sm02841a), 2017-01-01
Supplement: c6sm02841a1.zip [file c6sm02841a1.zip]

# Precise measurements of capsule mechanical properties using indentation

Joseph D. Berry,<sup>1,2,\*</sup> Srinivas Mettu,<sup>1,2</sup> and Raymond R. Dagastine<sup>1,2,†</sup>

<sup>1</sup>*Department of Chemical and Biomolecular Engineering,  
University of Melbourne, Parkville, Victoria 3010, Australia*

<sup>2</sup>*Particulate Fluids Processing Centre,  
University of Melbourne, Parkville Victoria, 3010, Australia*

(Dated: February 13, 2017)

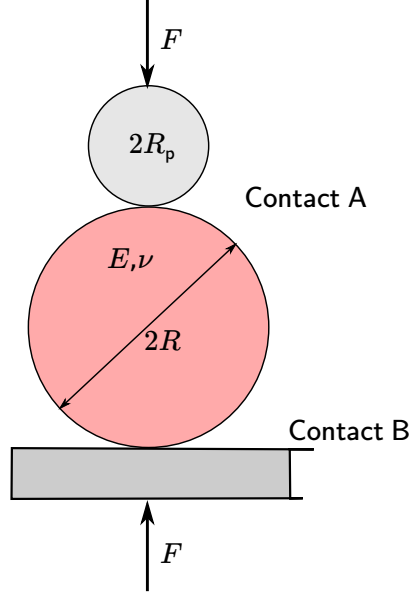

FIG. S1. Schematic of the two contact problem for a particle.

## SUPPLEMENTAL MATERIAL

### Derivation of correction factor expression for microparticle compression

For sufficiently soft particles, the correction factor is a function of the indenter radius ratio, as shown by Glaubitz *et al.* [1] for the particle case ( $h/R = 1$ ). To elucidate this further, consider a solid particle of radius  $R$ . Hertz theory shows that the force on a particle due to indentation is linearly proportional to the contact radius and the indentation depth. Thus, for a fixed force, increasing the contact radius will decrease the indentation depth, and vice versa. In the particle reference frame, we have a spherical probe of radius  $R_p$  indenting the top of the particle, and the flat substrate indenting the bottom of the particle (Figure S1). If the correction factor  $C$  is equal to 0.5, then the indentation depths at the top and the bottom of the particle will be equal. However, it is clear that the contact areas (and thus contact radii) at the top and the bottom of the particle are not equal (unless the probe and the substrate have the same radii). Further, the forces acting at the top and the bottom of the particle are equal and opposite, meaning that the indentation depth at the top must be greater than the indentation depth at the bottom due to the difference in contact radii of the probe and the substrate. Consequently, the correction factor is not always 0.5, rather it is a function of the indenter radius ratio, even if the probe and substrate are stiff compared

to the particle.

The relationship between correction factor and indenter radius ratio can be analytically derived as follows. In the reference frame of the particle, the probe indents the particle by a distance  $\delta_A$  and the substrate indents the particle by a distance  $\delta_B$ . The force  $F$  is equal and opposite for contact A & B, and can be defined using the Hertz equation as:

$$F = \frac{4E\bar{R}_A^{\frac{1}{2}}\delta_A^{\frac{3}{2}}}{3(1-\nu^2)} \quad (\text{Contact A}) \quad (\text{S1})$$

$$F = \frac{4E\bar{R}_B^{\frac{1}{2}}\delta_B^{\frac{3}{2}}}{3(1-\nu^2)} \quad (\text{Contact B}) \quad (\text{S2})$$

Combining equations S1 & S2 gives:

$$\bar{R}_A^{\frac{1}{2}}\delta_A^{\frac{3}{2}} = \bar{R}_B^{\frac{1}{2}}\delta_B^{\frac{3}{2}} \quad (\text{S3})$$

Thus, the indentation due to the substrate  $\delta_B$  can be written in terms of the indentation due to the particle  $\delta_A$  with:

$$\delta_B = \left(\frac{\bar{R}_A}{\bar{R}_B}\right)^{\frac{1}{3}} \delta_A \quad (\text{S4})$$

In the laboratory reference frame the substrate is fixed in place and no indentation occurs, whilst the probe indents the particle by a distance  $\delta_A + \delta_B$ . Using the notation of Figure 1 in the manuscript, this distance is the measured indentation  $\delta_{\text{afm}}$ , and  $\delta_A$  and  $\delta_B$  are  $\delta_{\text{eff.}}$  and  $\delta_s$  respectively. Thus:

$$\delta_{\text{afm}} = \delta_{\text{eff.}} + \delta_s = \delta_{\text{eff.}} + \left(\frac{\bar{R}_A}{\bar{R}_B}\right)^{\frac{1}{3}} \delta_{\text{eff.}} = \delta_{\text{eff.}} \left[1 + \left(\frac{\bar{R}_A}{\bar{R}_B}\right)^{\frac{1}{3}}\right] \quad (\text{S5})$$

Because the substrate is flat the effective radius  $\bar{R}_B = R$ , where  $R$  is the radius of the particle. Further, the effective radius  $\bar{R}_A = R_p R / (R_p + R)$ , where  $R_p$  is the radius of the probe. Thus, Equation S5 becomes:

$$\delta_{\text{afm}} = \delta_{\text{eff.}} \left[1 + \left(\frac{R_p}{R_p + R}\right)^{\frac{1}{3}}\right] \quad (\text{S6})$$

and the correction factor  $C$  can be written as:

$$C = \frac{\delta_{\text{eff.}}}{\delta_{\text{afm}}} = \left[1 + \left(\frac{R_p}{R_p + R}\right)^{\frac{1}{3}}\right]^{-1} \quad (\text{S7})$$

or, as a function of the indenter radius ratio  $R_p/R$  as:

$$C = \frac{\delta_{\text{eff.}}}{\delta_{\text{afm}}} = \frac{[(R_p/R) + 1]^{\frac{1}{3}}}{[(R_p/R) + 1]^{\frac{1}{3}} + (R_p/R)^{\frac{1}{3}}}. \quad (\text{S8})$$

This result is consistent with the derivation in Glaubitz *et al.* [1].

## Numerical method

The commercial software Comsol Multiphysics (5.2a) was used to carry out numerical simulations of the indentation process. Briefly, the capsule is in mechanical equilibrium, which is expressed mathematically as:

$$\partial_i \sigma_{ij} = 0, \quad (\text{S9})$$

where  $\boldsymbol{\sigma}$  is the stress tensor. Assuming that the behaviour of the material is linearly elastic, the constitutive relationship between stresses  $\sigma_{ij}$  and strains  $\epsilon_{ij}$  is given by Hooke's law:

$$\sigma_{ij} = \frac{E}{1 + \nu} \left[ \epsilon_{ij} + \frac{\nu}{1 - 2\nu} \epsilon_{kk} \delta_{ij} \right], \quad (\text{S10})$$

with  $E$  and  $\nu$  the capsule Young's modulus and Poisson's ratio respectively. The strains are defined in terms of the material displacement  $\mathbf{u}$  as

$$\epsilon_{ij} = \frac{1}{2} \left( \frac{\partial u_i}{\partial x_j} + \frac{\partial u_j}{\partial x_i} \right) \quad (\text{S11})$$

Figure S2 shows an example of the axisymmetric geometry and mesh used to solve equation S9 for the unknown material displacements  $\mathbf{u}$ . The indenter and the rigid substrate were each specified as a material with Young's modulus  $E_0 \gg E$ . The indenter was set to move with prescribed displacement  $\delta_{\text{afm}}$ , and the substrate was fixed in position. The subsequent movement of the capsule centreline  $\delta_s$  was measured, as well as the force  $F$  exerted on the indenter. The mesh size was typically 130,000 elements, with appropriate refinement near the indentation regions (Figure S2).

The capsule was set to a nominal radius of 10  $\mu\text{m}$ , and a nominal Young's modulus of 1.9 GPa. The indenter radius and shell thickness were then specified according to the values of  $R_p/R$  and  $h/R$  being investigated. The resulting displacements  $\delta_s$  and forces  $F$  were measured for indenter displacements in the nominal nanometre range  $0 < \delta_{\text{afm}} < \min(150, 0.5h)$ , giving a non-dimensional range of  $0 < \delta_{\text{afm}}/R < \min(0.015, 0.5h/R)$ . The resulting effective indentation  $\delta_s$  was not quite a linear function of the applied indentation  $\delta_{\text{afm}}$  (Figure S3). The correction factors plotted in the main text are taken for fixed normalised applied indentation  $\delta_{\text{afm}}/R = 0.05$ , indicated in red on Figure S3.

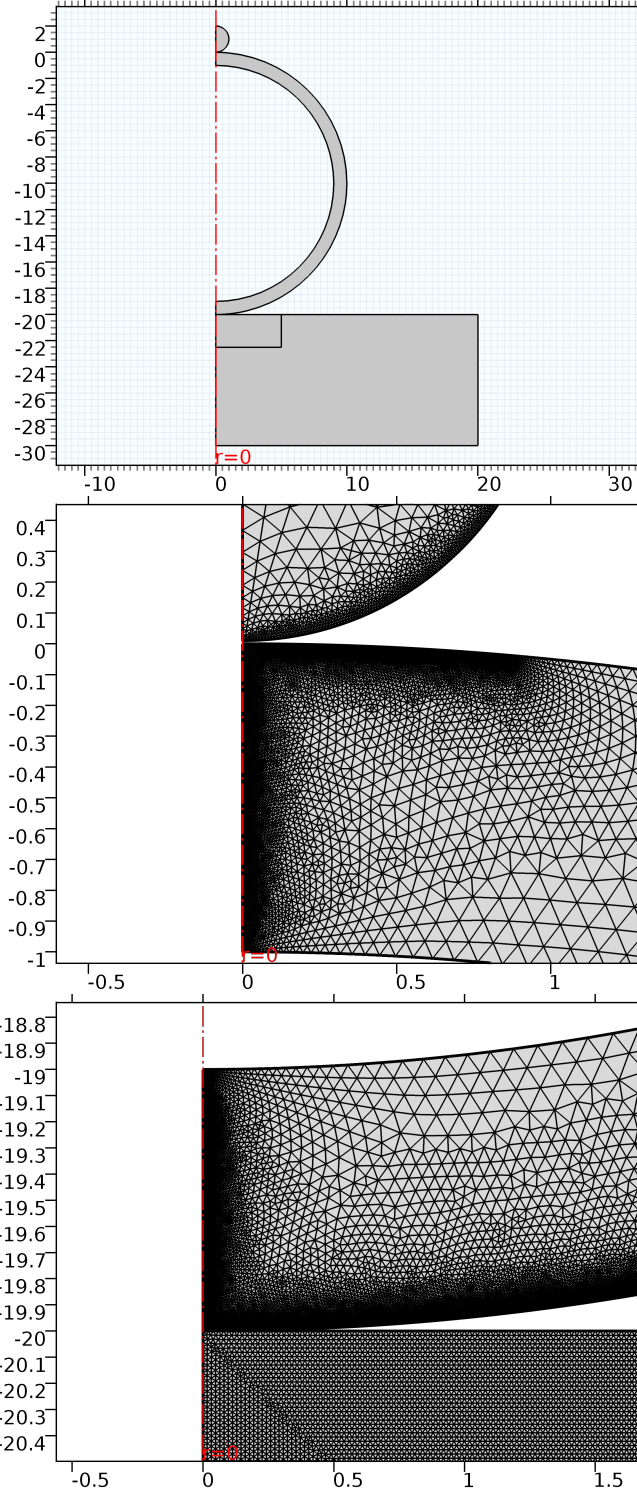

FIG. S2. Example of indenter, capsule & substrate geometry and mesh for indenter radius ratio  $R_p/R = 0.1$  and shell thickness ratio  $h/R = 0.1$ .

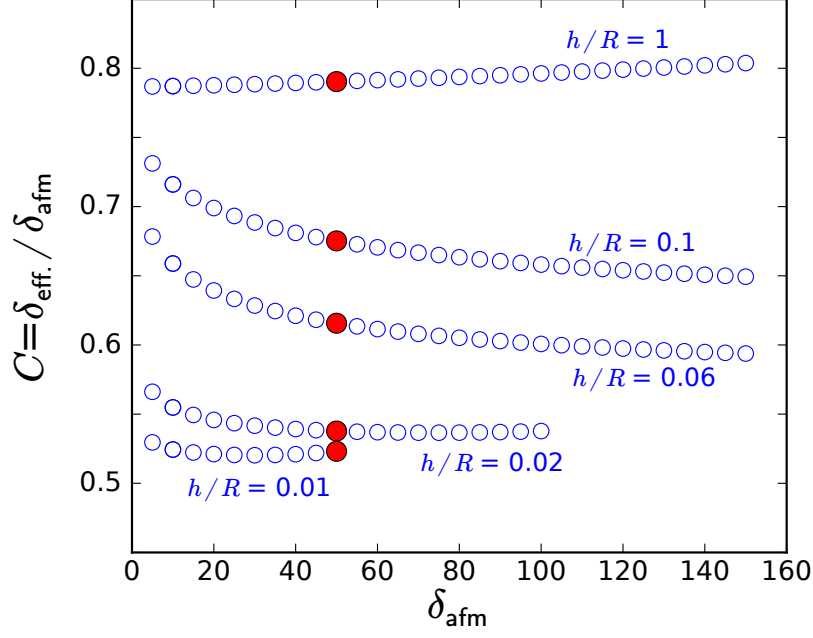

a)  $R_i/R = 0.02$

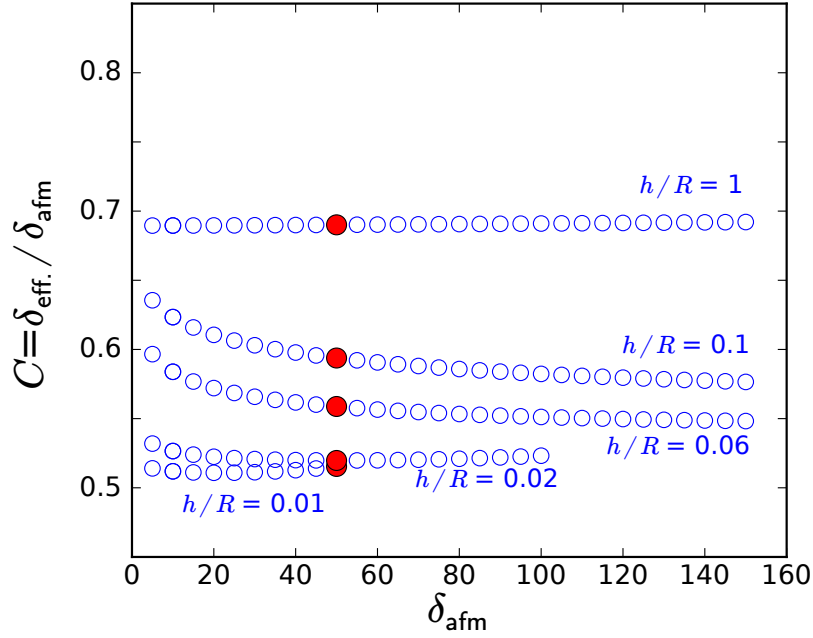

b)  $R_i/R = 0.1$

FIG. S3. Variation of correction factor  $C = \delta_{\text{eff.}} / \delta_{\text{afm}}$  with applied indentation  $\delta_{\text{afm}}$  for indenter radius ratios a)  $R_p/R = 0.02$ , and b)  $R_p/R = 0.1$ . The red symbols indicate the correction factors used in Figure 3, for fixed applied indentation of 50 nm ( $\delta_{\text{afm}}/R = 0.005$ ).

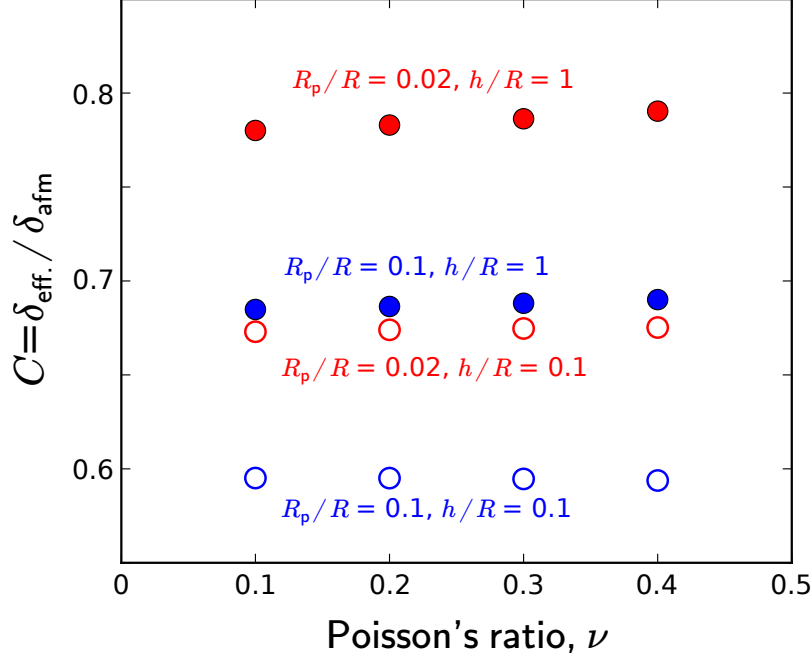

FIG. S4. Variation of correction factor  $C = \delta_{\text{eff.}}/\delta_{\text{afm}}$  with Poisson's ratio  $\nu$  for different shell thickness and indenter radius ratios.

TABLE S1. Experimental parameters for the capsule data shown in Figures 5 & S5.

| Figure | Material        | $\nu$ | R ( $\mu\text{m}$ ) | h (nm) | $R_p$ (nm)    | $h/R$ | $R_p/R$         |
|--------|-----------------|-------|---------------------|--------|---------------|-------|-----------------|
| 5c)    | Silica [2]      | 0.17  | 0.905               | 52     | $\lesssim 20$ | 0.06  | $\lesssim 0.02$ |
| 5a)    | Polylactide [3] | 0.42  | 1.25                | 19     | $\infty$      | 0.015 | $\infty$        |
| 5b)    | Polylactide [3] | 0.42  | 2.4                 | 36     | $\infty$      | 0.015 | $\infty$        |

### Interpolation tables and MATLAB calculator

In order to accurately determine the Young's modulus  $E$  from experimental force-indentation data, the data needs to be rescaled using Equation 5 in the manuscript:

$$\frac{F\sqrt{3(1-\nu^2)}}{(h/R)^3 4R^2} = E\beta \left( \frac{C\delta_{\text{afm}}}{h} \right)^\alpha. \quad (\text{S12})$$

The parameters  $C$ ,  $\alpha$  &  $\beta$  are functions of the experimental parameters Poisson's ratio  $\nu$ , the indenter radius ratio  $R_p/R$ , and the shell thickness ratio  $h/R$ . Interpolation tables for the correction parameter  $C$  are presented as functions of shell thickness ratio and indenter radius ratio in Tables 1A - 1D for Poisson's ratios of  $\nu = 0.1 - 0.4$  respectively. Similarly, Tables 2A

- 2D present the scaling exponent  $\alpha$ , and Tables 3A - 3D present the scaling exponent  $\beta$ , for each Poisson's ratio simulated. Note that the data is presented in terms of the logarithms of  $h/R$  and  $R_p/R$ . A MATLAB calculator is also included in the .zip file associated with this ESI that will generate appropriate parameters for a specific experimental dataset.



---

\* joe.d.berry@gmail.com

† rrd@unimelb.edu.au

- [1] M. Glaubitz, N. Medvedev, D. Pussak, L. Hartmann, S. Schmidt, C. A. Helm, and M. Delcea, *Soft Matter* **10**, 6732 (2014).
- [2] L. Zhang, M. D. Acunzi, M. Kappl, A. Imhof, D. Vollmer, and A. V. Blaaderen, *Phys. Chem. Chem. Phys.* **12**, 15392 (2010).
- [3] E. Glynos, V. Koutsos, W. N. McDicken, C. M. Moran, S. D. Pye, J. A. Ross, and V. Sboros, *Langmuir* **25**, 7514 (2009).

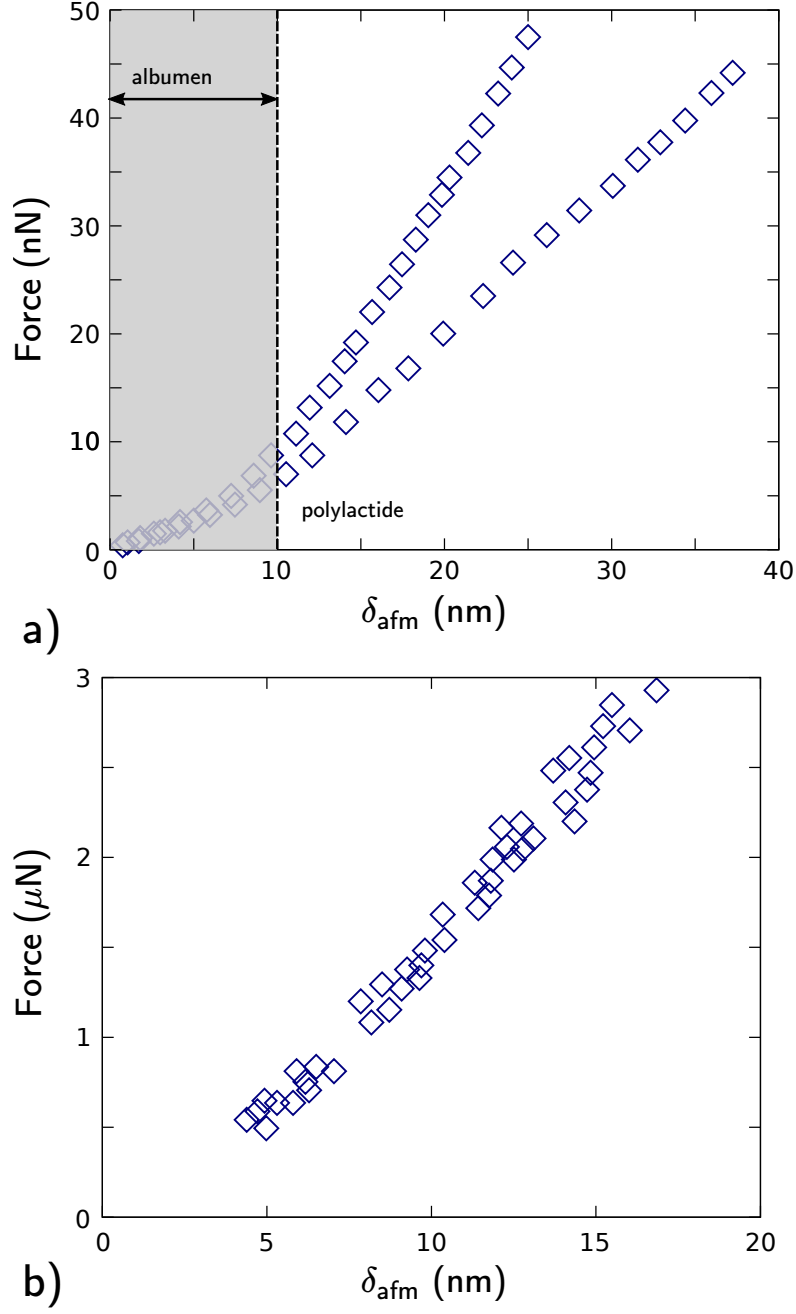

FIG. S5. Raw experimental data of a) Glynos *et al.* [3] and b) Zhang *et al.* [2]. The experimental parameters are listed in Table S1. The polylactide capsules are covered in a 10 nm thick layer of albumen, and consequently the data within the first 10 nm is not used in the calculation of the Young's modulus for polylactide.

| Indenter radius ratio, $R_p/R$ |       | Shell Thickness ratio, $h/R$                         |       |       |       |       |       |       |       |       |       |       |       |       |       |       |       |       |       |       |       |       |       |       |       |       |       |       |       |       |       |       |       |       |       |       |       |       |       |       |       |      |      |      |      |      |      |      |      |      |      |      |      |      |      |      |      |      |      |      |      |      |      |      |      |      |      |      |      |      |      |      |      |      |      |      |      |      |      |      |      |      |      |      |      |      |      |      |      |      |      |      |      |      |      |      |      |      |      |      |      |      |      |      |      |      |      |      |      |      |      |      |      |      |      |      |      |      |      |      |      |      |      |      |      |      |      |      |      |      |      |      |      |      |      |      |      |      |      |      |      |      |      |      |      |      |      |      |      |      |      |      |      |      |      |      |      |      |      |      |      |      |      |      |      |      |      |      |      |      |      |      |      |      |      |      |      |      |      |      |      |      |      |      |      |      |      |      |      |      |      |      |      |      |      |      |      |      |      |      |      |      |      |      |      |      |      |      |      |      |      |      |      |      |      |      |      |      |      |      |      |      |      |      |      |      |      |      |      |      |      |      |      |      |      |      |      |      |      |      |      |      |      |      |      |      |      |      |      |      |      |      |      |      |      |      |      |      |      |      |      |      |      |      |      |      |      |      |      |      |      |      |      |      |      |      |      |      |      |      |      |      |      |      |      |      |      |      |      |      |      |      |      |      |      |      |      |      |      |      |      |      |      |      |      |      |      |      |      |      |      |      |      |      |      |      |      |      |      |      |      |      |      |      |      |      |      |      |      |      |      |      |      |      |      |      |      |      |      |      |      |      |      |      |      |      |      |      |      |      |      |      |      |      |      |      |      |      |      |      |      |      |      |      |      |      |      |      |      |      |      |      |      |      |      |      |      |      |      |      |      |      |      |      |      |      |      |      |      |      |      |      |      |      |      |      |      |      |      |      |      |      |      |      |      |      |      |      |      |      |      |      |      |      |      |      |      |      |      |      |      |      |      |      |      |      |      |      |      |      |      |      |      |      |      |      |      |      |      |      |        |
|--------------------------------|-------|------------------------------------------------------|-------|-------|-------|-------|-------|-------|-------|-------|-------|-------|-------|-------|-------|-------|-------|-------|-------|-------|-------|-------|-------|-------|-------|-------|-------|-------|-------|-------|-------|-------|-------|-------|-------|-------|-------|-------|-------|-------|-------|------|------|------|------|------|------|------|------|------|------|------|------|------|------|------|------|------|------|------|------|------|------|------|------|------|------|------|------|------|------|------|------|------|------|------|------|------|------|------|------|------|------|------|------|------|------|------|------|------|------|------|------|------|------|------|------|------|------|------|------|------|------|------|------|------|------|------|------|------|------|------|------|------|------|------|------|------|------|------|------|------|------|------|------|------|------|------|------|------|------|------|------|------|------|------|------|------|------|------|------|------|------|------|------|------|------|------|------|------|------|------|------|------|------|------|------|------|------|------|------|------|------|------|------|------|------|------|------|------|------|------|------|------|------|------|------|------|------|------|------|------|------|------|------|------|------|------|------|------|------|------|------|------|------|------|------|------|------|------|------|------|------|------|------|------|------|------|------|------|------|------|------|------|------|------|------|------|------|------|------|------|------|------|------|------|------|------|------|------|------|------|------|------|------|------|------|------|------|------|------|------|------|------|------|------|------|------|------|------|------|------|------|------|------|------|------|------|------|------|------|------|------|------|------|------|------|------|------|------|------|------|------|------|------|------|------|------|------|------|------|------|------|------|------|------|------|------|------|------|------|------|------|------|------|------|------|------|------|------|------|------|------|------|------|------|------|------|------|------|------|------|------|------|------|------|------|------|------|------|------|------|------|------|------|------|------|------|------|------|------|------|------|------|------|------|------|------|------|------|------|------|------|------|------|------|------|------|------|------|------|------|------|------|------|------|------|------|------|------|------|------|------|------|------|------|------|------|------|------|------|------|------|------|------|------|------|------|------|------|------|------|------|------|------|------|------|------|------|------|------|------|------|------|------|------|------|------|------|------|------|------|------|------|------|------|------|------|------|------|------|------|------|------|------|------|------|------|------|------|------|------|------|------|------|------|------|------|------|------|------|------|------|------|------|------|------|------|------|------|--------|
|                                |       | Logarithm of shell thickness ratio, $\log_{10}(h/R)$ |       |       |       |       |       |       |       |       |       |       |       |       |       |       |       |       |       |       |       |       |       |       |       |       |       |       |       |       |       |       |       |       |       |       |       |       |       |       |       |      |      |      |      |      |      |      |      |      |      |      |      |      |      |      |      |      |      |      |      |      |      |      |      |      |      |      |      |      |      |      |      |      |      |      |      |      |      |      |      |      |      |      |      |      |      |      |      |      |      |      |      |      |      |      |      |      |      |      |      |      |      |      |      |      |      |      |      |      |      |      |      |      |      |      |      |      |      |      |      |      |      |      |      |      |      |      |      |      |      |      |      |      |      |      |      |      |      |      |      |      |      |      |      |      |      |      |      |      |      |      |      |      |      |      |      |      |      |      |      |      |      |      |      |      |      |      |      |      |      |      |      |      |      |      |      |      |      |      |      |      |      |      |      |      |      |      |      |      |      |      |      |      |      |      |      |      |      |      |      |      |      |      |      |      |      |      |      |      |      |      |      |      |      |      |      |      |      |      |      |      |      |      |      |      |      |      |      |      |      |      |      |      |      |      |      |      |      |      |      |      |      |      |      |      |      |      |      |      |      |      |      |      |      |      |      |      |      |      |      |      |      |      |      |      |      |      |      |      |      |      |      |      |      |      |      |      |      |      |      |      |      |      |      |      |      |      |      |      |      |      |      |      |      |      |      |      |      |      |      |      |      |      |      |      |      |      |      |      |      |      |      |      |      |      |      |      |      |      |      |      |      |      |      |      |      |      |      |      |      |      |      |      |      |      |      |      |      |      |      |      |      |      |      |      |      |      |      |      |      |      |      |      |      |      |      |      |      |      |      |      |      |      |      |      |      |      |      |      |      |      |      |      |      |      |      |      |      |      |      |      |      |      |      |      |      |      |      |      |      |      |      |      |      |      |      |      |      |      |      |      |      |      |      |      |      |      |      |      |      |      |      |      |      |      |      |      |      |      |      |      |      |      |      |      |      |      |      |      |      |      |      |      |      |      |      |      |      |      |        |
|                                |       | -2.00                                                | -1.95 | -1.90 | -1.85 | -1.80 | -1.75 | -1.70 | -1.65 | -1.60 | -1.55 | -1.50 | -1.45 | -1.40 | -1.35 | -1.30 | -1.25 | -1.20 | -1.15 | -1.10 | -1.05 | -1.00 | -0.95 | -0.90 | -0.85 | -0.80 | -0.75 | -0.70 | 0.251 | 0.282 | 0.316 | 0.355 | 0.398 | 0.447 | 0.501 | 0.562 | 0.631 | 0.708 | 0.794 | 0.891 | 1.000 |      |      |      |      |      |      |      |      |      |      |      |      |      |      |      |      |      |      |      |      |      |      |      |      |      |      |      |      |      |      |      |      |      |      |      |      |      |      |      |      |      |      |      |      |      |      |      |      |      |      |      |      |      |      |      |      |      |      |      |      |      |      |      |      |      |      |      |      |      |      |      |      |      |      |      |      |      |      |      |      |      |      |      |      |      |      |      |      |      |      |      |      |      |      |      |      |      |      |      |      |      |      |      |      |      |      |      |      |      |      |      |      |      |      |      |      |      |      |      |      |      |      |      |      |      |      |      |      |      |      |      |      |      |      |      |      |      |      |      |      |      |      |      |      |      |      |      |      |      |      |      |      |      |      |      |      |      |      |      |      |      |      |      |      |      |      |      |      |      |      |      |      |      |      |      |      |      |      |      |      |      |      |      |      |      |      |      |      |      |      |      |      |      |      |      |      |      |      |      |      |      |      |      |      |      |      |      |      |      |      |      |      |      |      |      |      |      |      |      |      |      |      |      |      |      |      |      |      |      |      |      |      |      |      |      |      |      |      |      |      |      |      |      |      |      |      |      |      |      |      |      |      |      |      |      |      |      |      |      |      |      |      |      |      |      |      |      |      |      |      |      |      |      |      |      |      |      |      |      |      |      |      |      |      |      |      |      |      |      |      |      |      |      |      |      |      |      |      |      |      |      |      |      |      |      |      |      |      |      |      |      |      |      |      |      |      |      |      |      |      |      |      |      |      |      |      |      |      |      |      |      |      |      |      |      |      |      |      |      |      |      |      |      |      |      |      |      |      |      |      |      |      |      |      |      |      |      |      |      |      |      |      |      |      |      |      |      |      |      |      |      |      |      |      |      |      |      |      |      |      |      |      |      |      |      |      |      |      |      |      |      |      |      |      |      |      |      |      |      |        |
| -1.7                           | 0.020 | 0.53                                                 | 0.53  | 0.53  | 0.53  | 0.53  | 0.54  | 0.54  | 0.55  | 0.56  | 0.56  | 0.57  | 0.58  | 0.59  | 0.60  | 0.60  | 0.61  | 0.62  | 0.63  | 0.65  | 0.66  | 0.67  | 0.69  | 0.70  | 0.71  | 0.72  | 0.73  | 0.74  | 0.75  | 0.76  | 0.76  | 0.77  | 0.77  | 0.78  | 0.78  | 0.78  | 0.78  | 0.78  | 0.78  | 0.78  | 0.78  | 0.78 |      |      |      |      |      |      |      |      |      |      |      |      |      |      |      |      |      |      |      |      |      |      |      |      |      |      |      |      |      |      |      |      |      |      |      |      |      |      |      |      |      |      |      |      |      |      |      |      |      |      |      |      |      |      |      |      |      |      |      |      |      |      |      |      |      |      |      |      |      |      |      |      |      |      |      |      |      |      |      |      |      |      |      |      |      |      |      |      |      |      |      |      |      |      |      |      |      |      |      |      |      |      |      |      |      |      |      |      |      |      |      |      |      |      |      |      |      |      |      |      |      |      |      |      |      |      |      |      |      |      |      |      |      |      |      |      |      |      |      |      |      |      |      |      |      |      |      |      |      |      |      |      |      |      |      |      |      |      |      |      |      |      |      |      |      |      |      |      |      |      |      |      |      |      |      |      |      |      |      |      |      |      |      |      |      |      |      |      |      |      |      |      |      |      |      |      |      |      |      |      |      |      |      |      |      |      |      |      |      |      |      |      |      |      |      |      |      |      |      |      |      |      |      |      |      |      |      |      |      |      |      |      |      |      |      |      |      |      |      |      |      |      |      |      |      |      |      |      |      |      |      |      |      |      |      |      |      |      |      |      |      |      |      |      |      |      |      |      |      |      |      |      |      |      |      |      |      |      |      |      |      |      |      |      |      |      |      |      |      |      |      |      |      |      |      |      |      |      |      |      |      |      |      |      |      |      |      |      |      |      |      |      |      |      |      |      |      |      |      |      |      |      |      |      |      |      |      |      |      |      |      |      |      |      |      |      |      |      |      |      |      |      |      |      |      |      |      |      |      |      |      |      |      |      |      |      |      |      |      |      |      |      |      |      |      |      |      |      |      |      |      |      |      |      |      |      |      |      |      |      |      |      |      |      |      |      |      |      |      |      |      |      |      |      |      |      |      |      |        |
| -1.6                           | 0.025 | 0.52                                                 | 0.53  | 0.53  | 0.53  | 0.53  | 0.54  | 0.54  | 0.55  | 0.56  | 0.57  | 0.58  | 0.58  | 0.59  | 0.60  | 0.61  | 0.61  | 0.62  | 0.63  | 0.64  | 0.65  | 0.66  | 0.67  | 0.69  | 0.70  | 0.71  | 0.72  | 0.73  | 0.74  | 0.75  | 0.75  | 0.76  | 0.76  | 0.76  | 0.76  | 0.76  | 0.76  | 0.76  | 0.76  | 0.76  | 0.76  | 0.76 | 0.76 | 0.77 | 0.77 |      |      |      |      |      |      |      |      |      |      |      |      |      |      |      |      |      |      |      |      |      |      |      |      |      |      |      |      |      |      |      |      |      |      |      |      |      |      |      |      |      |      |      |      |      |      |      |      |      |      |      |      |      |      |      |      |      |      |      |      |      |      |      |      |      |      |      |      |      |      |      |      |      |      |      |      |      |      |      |      |      |      |      |      |      |      |      |      |      |      |      |      |      |      |      |      |      |      |      |      |      |      |      |      |      |      |      |      |      |      |      |      |      |      |      |      |      |      |      |      |      |      |      |      |      |      |      |      |      |      |      |      |      |      |      |      |      |      |      |      |      |      |      |      |      |      |      |      |      |      |      |      |      |      |      |      |      |      |      |      |      |      |      |      |      |      |      |      |      |      |      |      |      |      |      |      |      |      |      |      |      |      |      |      |      |      |      |      |      |      |      |      |      |      |      |      |      |      |      |      |      |      |      |      |      |      |      |      |      |      |      |      |      |      |      |      |      |      |      |      |      |      |      |      |      |      |      |      |      |      |      |      |      |      |      |      |      |      |      |      |      |      |      |      |      |      |      |      |      |      |      |      |      |      |      |      |      |      |      |      |      |      |      |      |      |      |      |      |      |      |      |      |      |      |      |      |      |      |      |      |      |      |      |      |      |      |      |      |      |      |      |      |      |      |      |      |      |      |      |      |      |      |      |      |      |      |      |      |      |      |      |      |      |      |      |      |      |      |      |      |      |      |      |      |      |      |      |      |      |      |      |      |      |      |      |      |      |      |      |      |      |      |      |      |      |      |      |      |      |      |      |      |      |      |      |      |      |      |      |      |      |      |      |      |      |      |      |      |      |      |      |      |      |      |      |      |      |      |      |      |      |      |      |      |      |      |      |      |      |      |      |      |      |      |      |        |
| -1.5                           | 0.032 | 0.52                                                 | 0.53  | 0.53  | 0.53  | 0.53  | 0.54  | 0.55  | 0.56  | 0.57  | 0.57  | 0.58  | 0.59  | 0.59  | 0.60  | 0.61  | 0.62  | 0.63  | 0.64  | 0.65  | 0.66  | 0.68  | 0.69  | 0.70  | 0.71  | 0.72  | 0.73  | 0.74  | 0.74  | 0.75  | 0.75  | 0.75  | 0.75  | 0.75  | 0.75  | 0.75  | 0.75  | 0.75  | 0.75  | 0.75  | 0.75  | 0.75 | 0.75 | 0.75 | 0.75 | 0.75 | 0.75 |      |      |      |      |      |      |      |      |      |      |      |      |      |      |      |      |      |      |      |      |      |      |      |      |      |      |      |      |      |      |      |      |      |      |      |      |      |      |      |      |      |      |      |      |      |      |      |      |      |      |      |      |      |      |      |      |      |      |      |      |      |      |      |      |      |      |      |      |      |      |      |      |      |      |      |      |      |      |      |      |      |      |      |      |      |      |      |      |      |      |      |      |      |      |      |      |      |      |      |      |      |      |      |      |      |      |      |      |      |      |      |      |      |      |      |      |      |      |      |      |      |      |      |      |      |      |      |      |      |      |      |      |      |      |      |      |      |      |      |      |      |      |      |      |      |      |      |      |      |      |      |      |      |      |      |      |      |      |      |      |      |      |      |      |      |      |      |      |      |      |      |      |      |      |      |      |      |      |      |      |      |      |      |      |      |      |      |      |      |      |      |      |      |      |      |      |      |      |      |      |      |      |      |      |      |      |      |      |      |      |      |      |      |      |      |      |      |      |      |      |      |      |      |      |      |      |      |      |      |      |      |      |      |      |      |      |      |      |      |      |      |      |      |      |      |      |      |      |      |      |      |      |      |      |      |      |      |      |      |      |      |      |      |      |      |      |      |      |      |      |      |      |      |      |      |      |      |      |      |      |      |      |      |      |      |      |      |      |      |      |      |      |      |      |      |      |      |      |      |      |      |      |      |      |      |      |      |      |      |      |      |      |      |      |      |      |      |      |      |      |      |      |      |      |      |      |      |      |      |      |      |      |      |      |      |      |      |      |      |      |      |      |      |      |      |      |      |      |      |      |      |      |      |      |      |      |      |      |      |      |      |      |      |      |      |      |      |      |      |      |      |      |      |      |      |      |      |      |      |      |      |      |      |      |      |      |      |      |      |      |      |      |      |        |
| -1.4                           | 0.040 | 0.52                                                 | 0.53  | 0.53  | 0.53  | 0.53  | 0.54  | 0.55  | 0.56  | 0.57  | 0.58  | 0.59  | 0.59  | 0.60  | 0.61  | 0.62  | 0.63  | 0.64  | 0.65  | 0.66  | 0.67  | 0.68  | 0.69  | 0.70  | 0.71  | 0.72  | 0.73  | 0.74  | 0.74  | 0.75  | 0.75  | 0.75  | 0.75  | 0.75  | 0.75  | 0.75  | 0.75  | 0.75  | 0.75  | 0.75  | 0.75  | 0.75 | 0.75 | 0.75 | 0.75 | 0.75 | 0.75 | 0.75 |      |      |      |      |      |      |      |      |      |      |      |      |      |      |      |      |      |      |      |      |      |      |      |      |      |      |      |      |      |      |      |      |      |      |      |      |      |      |      |      |      |      |      |      |      |      |      |      |      |      |      |      |      |      |      |      |      |      |      |      |      |      |      |      |      |      |      |      |      |      |      |      |      |      |      |      |      |      |      |      |      |      |      |      |      |      |      |      |      |      |      |      |      |      |      |      |      |      |      |      |      |      |      |      |      |      |      |      |      |      |      |      |      |      |      |      |      |      |      |      |      |      |      |      |      |      |      |      |      |      |      |      |      |      |      |      |      |      |      |      |      |      |      |      |      |      |      |      |      |      |      |      |      |      |      |      |      |      |      |      |      |      |      |      |      |      |      |      |      |      |      |      |      |      |      |      |      |      |      |      |      |      |      |      |      |      |      |      |      |      |      |      |      |      |      |      |      |      |      |      |      |      |      |      |      |      |      |      |      |      |      |      |      |      |      |      |      |      |      |      |      |      |      |      |      |      |      |      |      |      |      |      |      |      |      |      |      |      |      |      |      |      |      |      |      |      |      |      |      |      |      |      |      |      |      |      |      |      |      |      |      |      |      |      |      |      |      |      |      |      |      |      |      |      |      |      |      |      |      |      |      |      |      |      |      |      |      |      |      |      |      |      |      |      |      |      |      |      |      |      |      |      |      |      |      |      |      |      |      |      |      |      |      |      |      |      |      |      |      |      |      |      |      |      |      |      |      |      |      |      |      |      |      |      |      |      |      |      |      |      |      |      |      |      |      |      |      |      |      |      |      |      |      |      |      |      |      |      |      |      |      |      |      |      |      |      |      |      |      |      |      |      |      |      |      |      |      |      |      |      |      |      |      |      |      |      |      |      |      |      |      |      |        |
| -1.3                           | 0.050 | 0.52                                                 | 0.53  | 0.53  | 0.53  | 0.53  | 0.54  | 0.55  | 0.56  | 0.57  | 0.57  | 0.58  | 0.58  | 0.59  | 0.60  | 0.61  | 0.62  | 0.63  | 0.64  | 0.65  | 0.66  | 0.67  | 0.68  | 0.69  | 0.70  | 0.71  | 0.72  | 0.73  | 0.74  | 0.74  | 0.75  | 0.75  | 0.75  | 0.75  | 0.75  | 0.75  | 0.75  | 0.75  | 0.75  | 0.75  | 0.75  | 0.75 | 0.75 | 0.75 | 0.75 | 0.75 | 0.75 | 0.75 | 0.75 |      |      |      |      |      |      |      |      |      |      |      |      |      |      |      |      |      |      |      |      |      |      |      |      |      |      |      |      |      |      |      |      |      |      |      |      |      |      |      |      |      |      |      |      |      |      |      |      |      |      |      |      |      |      |      |      |      |      |      |      |      |      |      |      |      |      |      |      |      |      |      |      |      |      |      |      |      |      |      |      |      |      |      |      |      |      |      |      |      |      |      |      |      |      |      |      |      |      |      |      |      |      |      |      |      |      |      |      |      |      |      |      |      |      |      |      |      |      |      |      |      |      |      |      |      |      |      |      |      |      |      |      |      |      |      |      |      |      |      |      |      |      |      |      |      |      |      |      |      |      |      |      |      |      |      |      |      |      |      |      |      |      |      |      |      |      |      |      |      |      |      |      |      |      |      |      |      |      |      |      |      |      |      |      |      |      |      |      |      |      |      |      |      |      |      |      |      |      |      |      |      |      |      |      |      |      |      |      |      |      |      |      |      |      |      |      |      |      |      |      |      |      |      |      |      |      |      |      |      |      |      |      |      |      |      |      |      |      |      |      |      |      |      |      |      |      |      |      |      |      |      |      |      |      |      |      |      |      |      |      |      |      |      |      |      |      |      |      |      |      |      |      |      |      |      |      |      |      |      |      |      |      |      |      |      |      |      |      |      |      |      |      |      |      |      |      |      |      |      |      |      |      |      |      |      |      |      |      |      |      |      |      |      |      |      |      |      |      |      |      |      |      |      |      |      |      |      |      |      |      |      |      |      |      |      |      |      |      |      |      |      |      |      |      |      |      |      |      |      |      |      |      |      |      |      |      |      |      |      |      |      |      |      |      |      |      |      |      |      |      |      |      |      |      |      |      |      |      |      |      |      |      |      |      |      |      |      |      |      |      |      |        |
| -1.2                           | 0.063 | 0.52                                                 | 0.52  | 0.52  | 0.53  | 0.53  | 0.54  | 0.55  | 0.56  | 0.57  | 0.57  | 0.58  | 0.58  | 0.59  | 0.60  | 0.61  | 0.62  | 0.63  | 0.64  | 0.65  | 0.66  | 0.67  | 0.68  | 0.69  | 0.70  | 0.71  | 0.72  | 0.73  | 0.74  | 0.74  | 0.75  | 0.75  | 0.75  | 0.75  | 0.75  | 0.75  | 0.75  | 0.75  | 0.75  | 0.75  | 0.75  | 0.75 | 0.75 | 0.75 | 0.75 | 0.75 | 0.75 | 0.75 | 0.75 |      |      |      |      |      |      |      |      |      |      |      |      |      |      |      |      |      |      |      |      |      |      |      |      |      |      |      |      |      |      |      |      |      |      |      |      |      |      |      |      |      |      |      |      |      |      |      |      |      |      |      |      |      |      |      |      |      |      |      |      |      |      |      |      |      |      |      |      |      |      |      |      |      |      |      |      |      |      |      |      |      |      |      |      |      |      |      |      |      |      |      |      |      |      |      |      |      |      |      |      |      |      |      |      |      |      |      |      |      |      |      |      |      |      |      |      |      |      |      |      |      |      |      |      |      |      |      |      |      |      |      |      |      |      |      |      |      |      |      |      |      |      |      |      |      |      |      |      |      |      |      |      |      |      |      |      |      |      |      |      |      |      |      |      |      |      |      |      |      |      |      |      |      |      |      |      |      |      |      |      |      |      |      |      |      |      |      |      |      |      |      |      |      |      |      |      |      |      |      |      |      |      |      |      |      |      |      |      |      |      |      |      |      |      |      |      |      |      |      |      |      |      |      |      |      |      |      |      |      |      |      |      |      |      |      |      |      |      |      |      |      |      |      |      |      |      |      |      |      |      |      |      |      |      |      |      |      |      |      |      |      |      |      |      |      |      |      |      |      |      |      |      |      |      |      |      |      |      |      |      |      |      |      |      |      |      |      |      |      |      |      |      |      |      |      |      |      |      |      |      |      |      |      |      |      |      |      |      |      |      |      |      |      |      |      |      |      |      |      |      |      |      |      |      |      |      |      |      |      |      |      |      |      |      |      |      |      |      |      |      |      |      |      |      |      |      |      |      |      |      |      |      |      |      |      |      |      |      |      |      |      |      |      |      |      |      |      |      |      |      |      |      |      |      |      |      |      |      |      |      |      |      |      |      |      |      |      |      |      |      |      |        |
| -1.1                           | 0.079 | 0.52                                                 | 0.52  | 0.52  | 0.52  | 0.52  | 0.53  | 0.54  | 0.55  | 0.56  | 0.57  | 0.57  | 0.58  | 0.59  | 0.60  | 0.61  | 0.62  | 0.63  | 0.64  | 0.65  | 0.66  | 0.67  | 0.68  | 0.69  | 0.70  | 0.71  | 0.72  | 0.73  | 0.74  | 0.74  | 0.75  | 0.75  | 0.75  | 0.75  | 0.75  | 0.75  | 0.75  | 0.75  | 0.75  | 0.75  | 0.75  | 0.75 | 0.75 | 0.75 | 0.75 | 0.75 | 0.75 | 0.75 | 0.75 | 0.75 |      |      |      |      |      |      |      |      |      |      |      |      |      |      |      |      |      |      |      |      |      |      |      |      |      |      |      |      |      |      |      |      |      |      |      |      |      |      |      |      |      |      |      |      |      |      |      |      |      |      |      |      |      |      |      |      |      |      |      |      |      |      |      |      |      |      |      |      |      |      |      |      |      |      |      |      |      |      |      |      |      |      |      |      |      |      |      |      |      |      |      |      |      |      |      |      |      |      |      |      |      |      |      |      |      |      |      |      |      |      |      |      |      |      |      |      |      |      |      |      |      |      |      |      |      |      |      |      |      |      |      |      |      |      |      |      |      |      |      |      |      |      |      |      |      |      |      |      |      |      |      |      |      |      |      |      |      |      |      |      |      |      |      |      |      |      |      |      |      |      |      |      |      |      |      |      |      |      |      |      |      |      |      |      |      |      |      |      |      |      |      |      |      |      |      |      |      |      |      |      |      |      |      |      |      |      |      |      |      |      |      |      |      |      |      |      |      |      |      |      |      |      |      |      |      |      |      |      |      |      |      |      |      |      |      |      |      |      |      |      |      |      |      |      |      |      |      |      |      |      |      |      |      |      |      |      |      |      |      |      |      |      |      |      |      |      |      |      |      |      |      |      |      |      |      |      |      |      |      |      |      |      |      |      |      |      |      |      |      |      |      |      |      |      |      |      |      |      |      |      |      |      |      |      |      |      |      |      |      |      |      |      |      |      |      |      |      |      |      |      |      |      |      |      |      |      |      |      |      |      |      |      |      |      |      |      |      |      |      |      |      |      |      |      |      |      |      |      |      |      |      |      |      |      |      |      |      |      |      |      |      |      |      |      |      |      |      |      |      |      |      |      |      |      |      |      |      |      |      |      |      |      |      |      |      |      |      |      |      |      |        |
| -1                             | 0.100 | 0.52                                                 | 0.52  | 0.52  | 0.52  | 0.52  | 0.53  | 0.54  | 0.55  | 0.56  | 0.57  | 0.57  | 0.58  | 0.59  | 0.60  | 0.61  | 0.62  | 0.63  | 0.64  | 0.65  | 0.66  | 0.67  | 0.68  | 0.69  | 0.70  | 0.71  | 0.72  | 0.73  | 0.74  | 0.74  | 0.75  | 0.75  | 0.75  | 0.75  | 0.75  | 0.75  | 0.75  | 0.75  | 0.75  | 0.75  | 0.75  | 0.75 | 0.75 | 0.75 | 0.75 | 0.75 | 0.75 | 0.75 | 0.75 | 0.75 | 0.75 | 0.75 |      |      |      |      |      |      |      |      |      |      |      |      |      |      |      |      |      |      |      |      |      |      |      |      |      |      |      |      |      |      |      |      |      |      |      |      |      |      |      |      |      |      |      |      |      |      |      |      |      |      |      |      |      |      |      |      |      |      |      |      |      |      |      |      |      |      |      |      |      |      |      |      |      |      |      |      |      |      |      |      |      |      |      |      |      |      |      |      |      |      |      |      |      |      |      |      |      |      |      |      |      |      |      |      |      |      |      |      |      |      |      |      |      |      |      |      |      |      |      |      |      |      |      |      |      |      |      |      |      |      |      |      |      |      |      |      |      |      |      |      |      |      |      |      |      |      |      |      |      |      |      |      |      |      |      |      |      |      |      |      |      |      |      |      |      |      |      |      |      |      |      |      |      |      |      |      |      |      |      |      |      |      |      |      |      |      |      |      |      |      |      |      |      |      |      |      |      |      |      |      |      |      |      |      |      |      |      |      |      |      |      |      |      |      |      |      |      |      |      |      |      |      |      |      |      |      |      |      |      |      |      |      |      |      |      |      |      |      |      |      |      |      |      |      |      |      |      |      |      |      |      |      |      |      |      |      |      |      |      |      |      |      |      |      |      |      |      |      |      |      |      |      |      |      |      |      |      |      |      |      |      |      |      |      |      |      |      |      |      |      |      |      |      |      |      |      |      |      |      |      |      |      |      |      |      |      |      |      |      |      |      |      |      |      |      |      |      |      |      |      |      |      |      |      |      |      |      |      |      |      |      |      |      |      |      |      |      |      |      |      |      |      |      |      |      |      |      |      |      |      |      |      |      |      |      |      |      |      |      |      |      |      |      |      |      |      |      |      |      |      |      |      |      |      |      |      |      |      |      |      |      |      |      |      |      |      |      |      |        |
| -0.9                           | 0.126 | 0.52                                                 | 0.52  | 0.52  | 0.52  | 0.52  | 0.52  | 0.53  | 0.54  | 0.55  | 0.56  | 0.57  | 0.58  | 0.59  | 0.60  | 0.61  | 0.62  | 0.63  | 0.64  | 0.65  | 0.66  | 0.67  | 0.68  | 0.69  | 0.70  | 0.71  | 0.72  | 0.73  | 0.74  | 0.74  | 0.75  | 0.75  | 0.75  | 0.75  | 0.75  | 0.75  | 0.75  | 0.75  | 0.75  | 0.75  | 0.75  | 0.75 | 0.75 | 0.75 | 0.75 | 0.75 | 0.75 | 0.75 | 0.75 | 0.75 | 0.75 | 0.75 | 0.75 |      |      |      |      |      |      |      |      |      |      |      |      |      |      |      |      |      |      |      |      |      |      |      |      |      |      |      |      |      |      |      |      |      |      |      |      |      |      |      |      |      |      |      |      |      |      |      |      |      |      |      |      |      |      |      |      |      |      |      |      |      |      |      |      |      |      |      |      |      |      |      |      |      |      |      |      |      |      |      |      |      |      |      |      |      |      |      |      |      |      |      |      |      |      |      |      |      |      |      |      |      |      |      |      |      |      |      |      |      |      |      |      |      |      |      |      |      |      |      |      |      |      |      |      |      |      |      |      |      |      |      |      |      |      |      |      |      |      |      |      |      |      |      |      |      |      |      |      |      |      |      |      |      |      |      |      |      |      |      |      |      |      |      |      |      |      |      |      |      |      |      |      |      |      |      |      |      |      |      |      |      |      |      |      |      |      |      |      |      |      |      |      |      |      |      |      |      |      |      |      |      |      |      |      |      |      |      |      |      |      |      |      |      |      |      |      |      |      |      |      |      |      |      |      |      |      |      |      |      |      |      |      |      |      |      |      |      |      |      |      |      |      |      |      |      |      |      |      |      |      |      |      |      |      |      |      |      |      |      |      |      |      |      |      |      |      |      |      |      |      |      |      |      |      |      |      |      |      |      |      |      |      |      |      |      |      |      |      |      |      |      |      |      |      |      |      |      |      |      |      |      |      |      |      |      |      |      |      |      |      |      |      |      |      |      |      |      |      |      |      |      |      |      |      |      |      |      |      |      |      |      |      |      |      |      |      |      |      |      |      |      |      |      |      |      |      |      |      |      |      |      |      |      |      |      |      |      |      |      |      |      |      |      |      |      |      |      |      |      |      |      |      |      |      |      |      |      |      |      |      |      |      |      |      |      |      |      |        |
| -0.8                           | 0.158 | 0.52                                                 | 0.52  | 0.52  | 0.52  | 0.52  | 0.52  | 0.52  | 0.53  | 0.54  | 0.55  | 0.56  | 0.57  | 0.58  | 0.59  | 0.60  | 0.61  | 0.62  | 0.63  | 0.64  | 0.65  | 0.66  | 0.67  | 0.68  | 0.69  | 0.70  | 0.71  | 0.72  | 0.73  | 0.74  | 0.74  | 0.75  | 0.75  | 0.75  | 0.75  | 0.75  | 0.75  | 0.75  | 0.75  | 0.75  | 0.75  | 0.75 | 0.75 | 0.75 | 0.75 | 0.75 | 0.75 | 0.75 | 0.75 | 0.75 | 0.75 | 0.75 | 0.75 | 0.75 | 0.75 | 0.75 | 0.75 | 0.75 | 0.75 | 0.75 | 0.75 | 0.75 | 0.75 | 0.75 | 0.75 | 0.75 | 0.75 | 0.75 | 0.75 | 0.75 | 0.75 | 0.75 | 0.75 | 0.75 | 0.75 | 0.75 | 0.75 | 0.75 | 0.75 | 0.75 | 0.75 | 0.75 | 0.75 | 0.75 | 0.75 | 0.75 | 0.75 | 0.75 | 0.75 | 0.75 | 0.75 | 0.75 | 0.75 | 0.75 | 0.75 | 0.75 | 0.75 | 0.75 | 0.75 | 0.75 | 0.75 | 0.75 | 0.75 | 0.75 | 0.75 | 0.75 | 0.75 | 0.75 | 0.75 | 0.75 | 0.75 | 0.75 | 0.75 | 0.75 | 0.75 | 0.75 | 0.75 | 0.75 | 0.75 | 0.75 | 0.75 | 0.75 | 0.75 | 0.75 | 0.75 | 0.75 | 0.75 | 0.75 | 0.75 | 0.75 | 0.75 | 0.75 | 0.75 | 0.75 | 0.75 | 0.75 | 0.75 | 0.75 | 0.75 | 0.75 | 0.75 | 0.75 | 0.75 | 0.75 | 0.75 | 0.75 | 0.75 | 0.75 | 0.75 | 0.75 | 0.75 | 0.75 | 0.75 | 0.75 | 0.75 | 0.75 | 0.75 | 0.75 | 0.75 | 0.75 | 0.75 | 0.75 | 0.75 | 0.75 | 0.75 | 0.75 | 0.75 | 0.75 | 0.75 | 0.75 | 0.75 | 0.75 | 0.75 | 0.75 | 0.75 | 0.75 | 0.75 | 0.75 | 0.75 | 0.75 | 0.75 | 0.75 | 0.75 | 0.75 | 0.75 | 0.75 | 0.75 | 0.75 | 0.75 | 0.75 | 0.75 | 0.75 | 0.75 | 0.75 | 0.75 | 0.75 | 0.75 | 0.75 | 0.75 | 0.75 | 0.75 | 0.75 | 0.75 | 0.75 | 0.75 | 0.75 | 0.75 | 0.75 | 0.75 | 0.75 | 0.75 | 0.75 | 0.75 | 0.75 | 0.75 | 0.75 | 0.75 | 0.75 | 0.75 | 0.75 | 0.75 | 0.75 | 0.75 | 0.75 | 0.75 | 0.75 | 0.75 | 0.75 | 0.75 | 0.75 | 0.75 | 0.75 | 0.75 | 0.75 | 0.75 | 0.75 | 0.75 | 0.75 | 0.75 | 0.75 | 0.75 | 0.75 | 0.75 | 0.75 | 0.75 | 0.75 | 0.75 | 0.75 | 0.75 | 0.75 | 0.75 | 0.75 | 0.75 | 0.75 | 0.75 | 0.75 | 0.75 | 0.75 | 0.75 | 0.75 | 0.75 | 0.75 | 0.75 | 0.75 | 0.75 | 0.75 | 0.75 | 0.75 | 0.75 | 0.75 | 0.75 | 0.75 | 0.75 | 0.75 | 0.75 | 0.75 | 0.75 | 0.75 | 0.75 | 0.75 | 0.75 | 0.75 | 0.75 | 0.75 | 0.75 | 0.75 | 0.75 | 0.75 | 0.75 | 0.75 | 0.75 | 0.75 | 0.75 | 0.75 | 0.75 | 0.75 | 0.75 | 0.75 | 0.75 | 0.75 | 0.75 | 0.75 | 0.75 | 0.75 | 0.75 | 0.75 | 0.75 | 0.75 | 0.75 | 0.75 | 0.75 | 0.75 | 0.75 | 0.75 | 0.75 | 0.75 | 0.75 | 0.75 | 0.75 | 0.75 | 0.75 | 0.75 | 0.75 | 0.75 | 0.75 | 0.75 | 0.75 | 0.75 | 0.75 | 0.75 | 0.75 | 0.75 | 0.75 | 0.75 | 0.75 | 0.75 | 0.75 | 0.75 | 0.75 | 0.75 | 0.75 | 0.75 | 0.75 | 0.75 | 0.75 | 0.75 | 0.75 | 0.75 | 0.75 | 0.75 | 0.75 | 0.75 | 0.75 | 0.75 | 0.75 | 0.75 | 0.75 | 0.75 | 0.75 | 0.75 | 0.75 | 0.75 | 0.75 | 0.75 | 0.75 | 0.75 | 0.75 | 0.75 | 0.75 | 0.75 | 0.75 | 0.75 | 0.75 | 0.75 | 0.75 | 0.75 | 0.75 | 0.75 | 0.75 | 0.75 | 0.75 | 0.75 | 0.75 | 0.75 | 0.75 | 0.75 | 0.75 | 0.75 | 0.75 | 0.75 | 0.75 | 0.75 | 0.75 | 0.75 | 0.75 | 0.75 | 0.75 | 0.75 | 0.75 | 0.75 | 0.75 | 0.75 | 0.75 | 0.75 | 0.75 | 0.75 | 0.75 | 0.75 | 0.75 | 0.75 | 0.75 | 0.75 | 0.75 | 0.75 | 0.75 | 0.75 | 0.75 | 0.75 | 0.75 | 0.75 | 0.75 | 0.75 | 0.75 | 0.75 | 0.75 | 0.75 | 0.75 | 0.75 | 0.75 | 0.75 | 0.75 | 0.75 | 0.75 | 0.75 | 0.75 | 0.75 | 0.75 | 0.75 | 0.75 | 0.75 | 0.75</ |

Table 1A: Interpolation table for the correction factor  $C$ , with Poisson's ratio  $\nu = 0.1$ .

| Indenter radius ratio, $R_p/R$ |        | Shell Thickness ratio, $h/R$                         |       |       |       |       |       |       |       |       |       |       |       |       |       |       |       |       |       |       |       |       |       |       |       |       |       |       |
|--------------------------------|--------|------------------------------------------------------|-------|-------|-------|-------|-------|-------|-------|-------|-------|-------|-------|-------|-------|-------|-------|-------|-------|-------|-------|-------|-------|-------|-------|-------|-------|-------|
|                                |        | Logarithm of shell thickness ratio, $\log_{10}(h/R)$ |       |       |       |       |       |       |       |       |       |       |       |       |       |       |       |       |       |       |       |       |       |       |       |       |       |       |
|                                |        |                                                      |       |       |       |       |       |       |       |       |       |       |       |       |       |       |       |       |       |       |       |       |       |       |       |       |       |       |
|                                |        | -2.00                                                | -1.95 | -1.90 | -1.85 | -1.80 | -1.75 | -1.70 | -1.65 | -1.60 | -1.55 | -1.50 | -1.45 | -1.40 | -1.35 | -1.30 | -1.25 | -1.20 | -1.15 | -1.10 | -1.05 | -1.00 | -0.95 | -0.90 | -0.85 | -0.80 | -0.75 | -0.70 |
| -1.7                           | 0.020  | 0.53                                                 | 0.53  | 0.53  | 0.53  | 0.53  | 0.54  | 0.54  | 0.55  | 0.56  | 0.56  | 0.57  | 0.58  | 0.59  | 0.60  | 0.60  | 0.61  | 0.62  | 0.63  | 0.64  | 0.65  | 0.67  | 0.69  | 0.70  | 0.71  | 0.72  | 0.73  | 0.74  |
| -1.6                           | 0.025  | 0.52                                                 | 0.53  | 0.53  | 0.53  | 0.53  | 0.54  | 0.54  | 0.55  | 0.56  | 0.57  | 0.58  | 0.59  | 0.59  | 0.60  | 0.61  | 0.61  | 0.62  | 0.63  | 0.64  | 0.65  | 0.66  | 0.68  | 0.69  | 0.70  | 0.71  | 0.72  | 0.73  |
| -1.5                           | 0.032  | 0.52                                                 | 0.53  | 0.53  | 0.53  | 0.53  | 0.54  | 0.55  | 0.56  | 0.57  | 0.57  | 0.58  | 0.59  | 0.59  | 0.60  | 0.61  | 0.62  | 0.63  | 0.64  | 0.65  | 0.66  | 0.68  | 0.69  | 0.70  | 0.72  | 0.73  | 0.74  | 0.75  |
| -1.4                           | 0.040  | 0.52                                                 | 0.52  | 0.53  | 0.53  | 0.53  | 0.53  | 0.54  | 0.55  | 0.56  | 0.57  | 0.58  | 0.59  | 0.59  | 0.60  | 0.61  | 0.62  | 0.63  | 0.64  | 0.65  | 0.66  | 0.67  | 0.68  | 0.69  | 0.70  | 0.71  | 0.72  | 0.73  |
| -1.3                           | 0.050  | 0.52                                                 | 0.52  | 0.53  | 0.53  | 0.53  | 0.53  | 0.54  | 0.55  | 0.56  | 0.57  | 0.57  | 0.58  | 0.58  | 0.59  | 0.60  | 0.61  | 0.62  | 0.63  | 0.64  | 0.65  | 0.66  | 0.67  | 0.68  | 0.69  | 0.70  | 0.71  | 0.72  |
| -1.2                           | 0.063  | 0.52                                                 | 0.52  | 0.52  | 0.53  | 0.53  | 0.53  | 0.54  | 0.55  | 0.56  | 0.57  | 0.57  | 0.58  | 0.58  | 0.59  | 0.60  | 0.61  | 0.62  | 0.63  | 0.64  | 0.65  | 0.66  | 0.67  | 0.68  | 0.69  | 0.70  | 0.71  | 0.72  |
| -1.1                           | 0.079  | 0.52                                                 | 0.52  | 0.52  | 0.52  | 0.52  | 0.52  | 0.53  | 0.54  | 0.55  | 0.56  | 0.57  | 0.57  | 0.58  | 0.59  | 0.60  | 0.61  | 0.62  | 0.63  | 0.64  | 0.65  | 0.66  | 0.67  | 0.68  | 0.69  | 0.70  | 0.71  | 0.72  |
| -1.0                           | 0.100  | 0.52                                                 | 0.52  | 0.52  | 0.52  | 0.52  | 0.52  | 0.52  | 0.53  | 0.54  | 0.55  | 0.56  | 0.57  | 0.58  | 0.59  | 0.60  | 0.61  | 0.62  | 0.63  | 0.64  | 0.65  | 0.66  | 0.67  | 0.68  | 0.69  | 0.70  | 0.70  | 0.70  |
| -0.9                           | 0.126  | 0.52                                                 | 0.52  | 0.52  | 0.52  | 0.52  | 0.52  | 0.52  | 0.52  | 0.53  | 0.53  | 0.54  | 0.55  | 0.56  | 0.57  | 0.58  | 0.59  | 0.60  | 0.61  | 0.62  | 0.63  | 0.64  | 0.65  | 0.66  | 0.67  | 0.67  | 0.67  | 0.67  |
| -0.8                           | 0.158  | 0.52                                                 | 0.52  | 0.52  | 0.52  | 0.52  | 0.52  | 0.52  | 0.52  | 0.52  | 0.52  | 0.53  | 0.53  | 0.54  | 0.55  | 0.56  | 0.57  | 0.58  | 0.59  | 0.60  | 0.61  | 0.62  | 0.63  | 0.64  | 0.65  | 0.66  | 0.66  | 0.66  |
| -0.7                           | 0.200  | 0.51                                                 | 0.52  | 0.52  | 0.52  | 0.52  | 0.52  | 0.52  | 0.52  | 0.52  | 0.52  | 0.53  | 0.54  | 0.55  | 0.56  | 0.57  | 0.58  | 0.59  | 0.60  | 0.61  | 0.62  | 0.63  | 0.63  | 0.64  | 0.64  | 0.65  | 0.65  | 0.65  |
| -0.6                           | 0.251  | 0.51                                                 | 0.51  | 0.52  | 0.52  | 0.52  | 0.52  | 0.52  | 0.52  | 0.52  | 0.52  | 0.53  | 0.54  | 0.55  | 0.56  | 0.57  | 0.58  | 0.59  | 0.60  | 0.61  | 0.62  | 0.62  | 0.63  | 0.63  | 0.63  | 0.63  | 0.63  | 0.63  |
| -0.5                           | 0.316  | 0.51                                                 | 0.51  | 0.51  | 0.51  | 0.51  | 0.51  | 0.51  | 0.51  | 0.51  | 0.51  | 0.52  | 0.52  | 0.53  | 0.54  | 0.55  | 0.56  | 0.57  | 0.58  | 0.59  | 0.60  | 0.61  | 0.61  | 0.62  | 0.62  | 0.62  | 0.62  | 0.62  |
| -0.4                           | 0.398  | 0.51                                                 | 0.51  | 0.51  | 0.51  | 0.51  | 0.51  | 0.51  | 0.51  | 0.51  | 0.51  | 0.52  | 0.52  | 0.53  | 0.54  | 0.55  | 0.56  | 0.57  | 0.58  | 0.59  | 0.60  | 0.60  | 0.60  | 0.61  | 0.61  | 0.61  | 0.61  | 0.61  |
| -0.3                           | 0.501  | 0.51                                                 | 0.51  | 0.51  | 0.51  | 0.51  | 0.51  | 0.51  | 0.51  | 0.51  | 0.51  | 0.52  | 0.52  | 0.53  | 0.54  | 0.55  | 0.56  | 0.57  | 0.58  | 0.59  | 0.60  | 0.61  | 0.61  | 0.62  | 0.62  | 0.62  | 0.62  | 0.62  |
| -0.2                           | 0.631  | 0.51                                                 | 0.51  | 0.51  | 0.51  | 0.51  | 0.51  | 0.51  | 0.51  | 0.51  | 0.51  | 0.51  | 0.52  | 0.52  | 0.53  | 0.54  | 0.55  | 0.56  | 0.57  | 0.58  | 0.59  | 0.59  | 0.59  | 0.59  | 0.59  | 0.59  | 0.59  | 0.59  |
| -0.1                           | 0.794  | 0.51                                                 | 0.51  | 0.51  | 0.51  | 0.51  | 0.51  | 0.51  | 0.51  | 0.51  | 0.51  | 0.51  | 0.52  | 0.52  | 0.53  | 0.54  | 0.55  | 0.56  | 0.57  | 0.58  | 0.59  | 0.59  | 0.59  | 0.59  | 0.59  | 0.59  | 0.59  | 0.59  |
| 0                              | 1.000  | 0.51                                                 | 0.51  | 0.51  | 0.51  | 0.51  | 0.51  | 0.51  | 0.51  | 0.51  | 0.51  | 0.51  | 0.52  | 0.52  | 0.53  | 0.54  | 0.55  | 0.56  | 0.57  | 0.58  | 0.59  | 0.59  | 0.59  | 0.59  | 0.59  | 0.59  | 0.59  | 0.59  |
| 0.1                            | 1.259  | 0.51                                                 | 0.51  | 0.51  | 0.51  | 0.51  | 0.51  | 0.51  | 0.51  | 0.51  | 0.51  | 0.51  | 0.52  | 0.52  | 0.53  | 0.54  | 0.55  | 0.56  | 0.57  | 0.58  | 0.59  | 0.59  | 0.59  | 0.59  | 0.59  | 0.59  | 0.59  | 0.59  |
| 0.2                            | 1.585  | 0.51                                                 | 0.51  | 0.51  | 0.51  | 0.51  | 0.51  | 0.51  | 0.51  | 0.51  | 0.51  | 0.51  | 0.52  | 0.52  | 0.53  | 0.54  | 0.55  | 0.56  | 0.57  | 0.58  | 0.59  | 0.59  | 0.59  | 0.59  | 0.59  | 0.59  | 0.59  | 0.59  |
| 0.3                            | 1.995  | 0.51                                                 | 0.51  | 0.51  | 0.51  | 0.51  | 0.51  | 0.51  | 0.51  | 0.51  | 0.51  | 0.51  | 0.52  | 0.52  | 0.53  | 0.54  | 0.55  | 0.56  | 0.57  | 0.58  | 0.59  | 0.59  | 0.59  | 0.59  | 0.59  | 0.59  | 0.59  | 0.59  |
| 0.4                            | 2.512  | 0.50                                                 | 0.50  | 0.50  | 0.50  | 0.50  | 0.50  | 0.50  | 0.50  | 0.51  | 0.51  | 0.51  | 0.51  | 0.52  | 0.52  | 0.53  | 0.54  | 0.54  | 0.54  | 0.54  | 0.55  | 0.55  | 0.55  | 0.55  | 0.55  | 0.55  | 0.55  | 0.55  |
| 0.5                            | 3.162  | 0.50                                                 | 0.50  | 0.50  | 0.50  | 0.50  | 0.50  | 0.50  | 0.50  | 0.50  | 0.50  | 0.51  | 0.51  | 0.51  | 0.52  | 0.52  | 0.53  | 0.53  | 0.53  | 0.53  | 0.53  | 0.53  | 0.53  | 0.53  | 0.53  | 0.53  | 0.53  | 0.53  |
| 0.6                            | 3.981  | 0.50                                                 | 0.50  | 0.50  | 0.50  | 0.50  | 0.50  | 0.50  | 0.50  | 0.50  | 0.50  | 0.51  | 0.51  | 0.51  | 0.52  | 0.52  | 0.53  | 0.53  | 0.53  | 0.53  | 0.53  | 0.53  | 0.53  | 0.53  | 0.53  | 0.53  | 0.53  | 0.53  |
| 0.7                            | 5.012  | 0.50                                                 | 0.50  | 0.50  | 0.50  | 0.50  | 0.50  | 0.50  | 0.50  | 0.50  | 0.50  | 0.50  | 0.50  | 0.50  | 0.50  | 0.50  | 0.50  | 0.50  | 0.50  | 0.50  | 0.50  | 0.50  | 0.50  | 0.50  | 0.50  | 0.50  | 0.50  | 0.50  |
| 0.8                            | 6.310  | 0.50                                                 | 0.50  | 0.50  | 0.50  | 0.50  | 0.50  | 0.50  | 0.50  | 0.50  | 0.50  | 0.50  | 0.50  | 0.50  | 0.50  | 0.50  | 0.50  | 0.50  | 0.50  | 0.50  | 0.50  | 0.50  | 0.50  | 0.50  | 0.50  | 0.50  | 0.50  | 0.50  |
| 0.9                            | 7.943  | 0.50                                                 | 0.50  | 0.50  | 0.50  | 0.50  | 0.50  | 0.50  | 0.50  | 0.50  | 0.50  | 0.50  | 0.50  | 0.50  | 0.50  | 0.50  | 0.50  | 0.50  | 0.50  | 0.50  | 0.50  | 0.50  | 0.50  | 0.50  | 0.50  | 0.50  | 0.50  | 0.50  |
| 1.0                            | 10.000 | 0.50                                                 | 0.50  | 0.50  | 0.50  | 0.50  | 0.50  | 0.50  | 0.50  | 0.50  | 0.50  | 0.50  | 0.50  | 0.50  | 0.50  | 0.50  | 0.50  | 0.50  | 0.50  | 0.50  | 0.50  | 0.50  | 0.50  | 0.50  | 0.50  | 0.50  | 0.50  | 0.50  |
| 1.1                            | 12.589 | 0.50                                                 | 0.50  | 0.50  | 0.50  | 0.50  | 0.50  | 0.50  | 0.50  | 0.50  | 0.50  | 0.50  | 0.50  | 0.50  | 0.50  | 0.50  | 0.50  | 0.50  | 0.50  | 0.50  | 0.50  | 0.50  | 0.50  | 0.50  | 0.50  | 0.50  | 0.50  | 0.50  |
| 1.2                            | 15.849 | 0.50                                                 | 0.50  | 0.50  | 0.50  | 0.50  | 0.50  | 0.50  | 0.50  | 0.50  | 0.50  | 0.50  | 0.50  | 0.50  | 0.50  | 0.50  | 0.50  | 0.50  | 0.50  | 0.50  | 0.50  | 0.50  | 0.50  | 0.50  | 0.50  | 0.50  | 0.50  | 0.50  |
| 1.3                            | 19.953 | 0.50                                                 | 0.50  | 0.50  | 0.50  | 0.50  | 0.50  | 0.50  | 0.50  | 0.50  | 0.50  | 0.50  | 0.50  | 0.50  | 0.50  | 0.50  | 0.50  | 0.50  | 0.50  | 0.50  | 0.50  | 0.50  | 0.50  | 0.50  | 0.50  | 0.50  | 0.50  | 0.50  |
| 1.4                            | 25.119 | 0.50                                                 | 0.50  | 0.50  | 0.50  | 0.50  | 0.50  | 0.50  | 0.50  | 0.50  | 0.50  | 0.50  | 0.50  | 0.50  | 0.50  | 0.50  | 0.50  | 0.50  | 0.50  | 0.50  | 0.50  | 0.50  | 0.50  | 0.50  | 0.50  | 0.50  | 0.50  | 0.50  |
| 1.5                            | 31.623 | 0.50                                                 | 0.50  | 0.50  | 0.50  | 0.50  | 0.50  | 0.50  | 0.50  | 0.50  | 0.50  | 0.50  | 0.50  | 0.50  | 0.50  | 0.50  | 0.50  | 0.50  | 0.50  | 0.50  | 0.50  | 0.50  | 0.50  | 0.50  | 0.50  | 0.50  | 0.50  | 0.50  |
| 1.6                            | 39.811 | 0.50                                                 | 0.50  | 0.50  | 0.50  | 0.50  | 0.50  | 0.50  | 0.50  | 0.50  | 0.50  | 0.50  | 0.50  | 0.50  | 0.50  | 0.50  | 0.50  | 0.50  | 0.50  | 0.50  | 0.50  | 0.50  | 0.50  | 0.50  | 0.50  | 0.50  | 0.50  | 0.50  |
| 1.7                            | 50.119 | 0.50                                                 | 0.50  | 0.50  | 0.50  | 0.50  | 0.50  | 0.50  | 0.50  | 0.50  | 0.50  | 0.50  | 0.50  | 0.50  | 0.50  | 0.50  | 0.50  | 0.50  | 0.50  | 0.50  | 0.50  | 0.50  | 0.50  | 0.50  | 0.50  | 0.50  | 0.50  | 0.50  |
| 1.8                            | 63.096 | 0.50                                                 | 0.50  | 0.50  | 0.50  | 0.50  | 0.50  | 0.50  | 0.50  | 0.50  | 0.50  | 0.50  | 0.50  | 0.50  | 0.50  | 0.50  | 0.50  | 0.50  | 0.50  | 0.50  | 0.50  | 0.50  | 0.50  | 0.50  | 0.50  | 0.50  | 0.50  | 0.50  |
| 1.9                            | 79.433 | 0.50                                                 | 0.50  | 0.50  | 0.50  | 0.50  | 0.50  | 0.50  | 0.50  | 0.50  | 0.50  | 0.50  | 0.50  | 0.50  | 0.50  | 0.50  | 0.50  | 0.50  | 0.50  | 0.50  | 0.50  | 0.50  | 0.50  | 0.50  | 0.50  | 0.50  | 0.50  | 0.50  |
| 2                              | ##     | 0.50                                                 | 0.50  | 0.50  | 0.50  | 0.50  | 0.50  | 0.50  | 0.50  | 0.50  | 0.50  | 0.50  | 0.50  | 0.50  | 0.50  | 0.50  | 0.50  | 0.50  | 0.50  | 0.50  | 0.50  | 0.50  | 0.50  | 0.50  | 0.50  | 0.50  | 0.50  | 0.50  |

Table 1B: Interpolation table for the correction factor  $C$ , with Poisson's ratio  $\nu = 0.2$ .

| Indenter radius ratio, $R_p/R$ |       | Shell Thickness ratio, $h/R$                         |       |       |       |       |       |       |       |       |       |       |       |       |       |       |       |       |       |       |       |       |       |       |       |       |       |       |
|--------------------------------|-------|------------------------------------------------------|-------|-------|-------|-------|-------|-------|-------|-------|-------|-------|-------|-------|-------|-------|-------|-------|-------|-------|-------|-------|-------|-------|-------|-------|-------|-------|
|                                |       | Logarithm of shell thickness ratio, $\log_{10}(h/R)$ |       |       |       |       |       |       |       |       |       |       |       |       |       |       |       |       |       |       |       |       |       |       |       |       |       |       |
|                                |       |                                                      |       |       |       |       |       |       |       |       |       |       |       |       |       |       |       |       |       |       |       |       |       |       |       |       |       |       |
|                                |       | -2.00                                                | -1.95 | -1.90 | -1.85 | -1.80 | -1.75 | -1.70 | -1.65 | -1.60 | -1.55 | -1.50 | -1.45 | -1.40 | -1.35 | -1.30 | -1.25 | -1.20 | -1.15 | -1.10 | -1.05 | -1.00 | -0.95 | -0.90 | -0.85 | -0.80 | -0.75 | -0.70 |
| -1.7                           | 0.020 | 0.52                                                 | 0.53  | 0.53  | 0.53  | 0.53  | 0.54  | 0.54  | 0.55  | 0.55  | 0.56  | 0.57  | 0.58  | 0.59  | 0.60  | 0.61  | 0.62  | 0.64  | 0.65  | 0.66  | 0.67  | 0.69  | 0.70  | 0.71  | 0.72  | 0.73  | 0.74  | 0.75  |
| -1.6                           | 0.025 | 0.52                                                 | 0.53  | 0.53  | 0.53  | 0.53  | 0.54  | 0.54  | 0.55  | 0.56  | 0.57  | 0.58  | 0.59  | 0.60  | 0.61  | 0.62  | 0.64  | 0.65  | 0.66  | 0.68  | 0.69  | 0.70  | 0.71  | 0.72  | 0.73  | 0.74  | 0.75  | 0.76  |
| -1.5                           | 0.032 | 0.52                                                 | 0.52  | 0.53  | 0.53  | 0.53  | 0.53  | 0.53  | 0.54  | 0.55  | 0.56  | 0.57  | 0.58  | 0.59  | 0.60  | 0.61  | 0.62  | 0.63  | 0.64  | 0.65  | 0.66  | 0.68  | 0.69  | 0.70  | 0.71  | 0.72  | 0.73  | 0.74  |
| -1.4                           | 0.040 | 0.52                                                 | 0.52  | 0.53  | 0.53  | 0.53  | 0.53  | 0.53  | 0.54  | 0.55  | 0.56  | 0.57  | 0.58  | 0.59  | 0.60  | 0.61  | 0.62  | 0.63  | 0.64  | 0.65  | 0.67  | 0.68  | 0.69  | 0.70  | 0.71  | 0.72  | 0.73  | 0.74  |
| -1.3                           | 0.050 | 0.52                                                 | 0.52  | 0.52  | 0.53  | 0.53  | 0.53  | 0.53  | 0.54  | 0.54  | 0.55  | 0.56  | 0.57  | 0.57  | 0.58  | 0.58  | 0.59  | 0.60  | 0.61  | 0.62  | 0.63  | 0.64  | 0.65  | 0.66  | 0.67  | 0.68  | 0.69  | 0.70  |
| -1.2                           | 0.063 | 0.52                                                 | 0.52  | 0.52  | 0.52  | 0.53  | 0.53  | 0.54  | 0.54  | 0.55  | 0.55  | 0.56  | 0.56  | 0.56  | 0.57  | 0.57  | 0.58  | 0.59  | 0.60  | 0.61  | 0.62  | 0.63  | 0.64  | 0.65  | 0.66  | 0.67  | 0.68  | 0.69  |
| -1.1                           | 0.079 | 0.52                                                 | 0.52  | 0.52  | 0.52  | 0.52  | 0.52  | 0.53  | 0.54  | 0.54  | 0.55  | 0.55  | 0.56  | 0.56  | 0.57  | 0.57  | 0.58  | 0.59  | 0.60  | 0.61  | 0.62  | 0.63  | 0.64  | 0.65  | 0.66  | 0.67  | 0.68  | 0.69  |
| -1.0                           | 0.100 | 0.52                                                 | 0.52  | 0.52  | 0.52  | 0.52  | 0.52  | 0.52  | 0.53  | 0.54  | 0.54  | 0.55  | 0.55  | 0.56  | 0.56  | 0.57  | 0.58  | 0.59  | 0.60  | 0.61  | 0.62  | 0.63  | 0.64  | 0.65  | 0.66  | 0.67  | 0.68  | 0.69  |
| -0.9                           | 0.126 | 0.52                                                 | 0.52  | 0.52  | 0.52  | 0.52  | 0.52  | 0.52  | 0.52  | 0.53  | 0.53  | 0.54  | 0.54  | 0.55  | 0.55  | 0.56  | 0.56  | 0.57  | 0.58  | 0.59  | 0.60  | 0.61  | 0.62  | 0.63  | 0.64  | 0.65  | 0.66  | 0.67  |
| -0.8                           | 0.158 | 0.51                                                 | 0.52  | 0.52  | 0.52  | 0.52  | 0.52  | 0.52  | 0.52  | 0.52  | 0.52  | 0.53  | 0.53  | 0.54  | 0.54  | 0.55  | 0.55  | 0.56  | 0.57  | 0.58  | 0.59  | 0.60  | 0.61  | 0.62  | 0.63  | 0.64  | 0.65  | 0.66  |
| -0.7                           | 0.200 | 0.51                                                 | 0.51  | 0.52  | 0.52  | 0.52  | 0.52  | 0.52  | 0.52  | 0.52  | 0.52  | 0.53  | 0.53  | 0.54  | 0.54  | 0.55  | 0.55  | 0.56  | 0.57  | 0.58  | 0.59  | 0.60  | 0.61  | 0.62  | 0.63  | 0.63  | 0.63  | 0.64  |
| -0.6                           | 0.251 | 0.51                                                 | 0.51  | 0.51  | 0.52  | 0.52  | 0.51  | 0.51  | 0.52  | 0.52  | 0.52  | 0.53  | 0.53  | 0.54  | 0.54  | 0.55  | 0.55  | 0.56  | 0.57  | 0.58  | 0.59  | 0.60  | 0.61  | 0.62  | 0.62  | 0.63  | 0.63  | 0.63  |
| -0.5                           | 0.316 | 0.51                                                 | 0.51  | 0.51  | 0.51  | 0.51  | 0.51  | 0.51  | 0.51  | 0.51  | 0.52  | 0.52  | 0.52  | 0.53  | 0.53  | 0.53  | 0.53  | 0.54  | 0.54  | 0.55  | 0.56  | 0.57  | 0.58  | 0.59  | 0.60  | 0.61  | 0.61  | 0.61  |
| -0.4                           | 0.398 | 0.51                                                 | 0.51  | 0.51  | 0.51  | 0.51  | 0.51  | 0.51  | 0.51  | 0.51  | 0.51  | 0.52  | 0.52  | 0.52  | 0.53  | 0.53  | 0.53  | 0.54  | 0.54  | 0.55  | 0.56  | 0.57  | 0.58  | 0.59  | 0.60  | 0.60  | 0.61  | 0.61  |
| -0.3                           | 0.501 | 0.51                                                 | 0.51  | 0.51  | 0.51  | 0.51  | 0.51  | 0.51  | 0.51  | 0.51  | 0.51  | 0.51  | 0.51  | 0.51  | 0.52  | 0.52  | 0.53  | 0.53  | 0.54  | 0.54  | 0.55  | 0.56  | 0.57  | 0.58  | 0.58  | 0.58  | 0.58  | 0.58  |
| -0.2                           | 0.631 | 0.51                                                 | 0.51  | 0.51  | 0.51  | 0.51  | 0.51  | 0.51  | 0.51  | 0.51  | 0.51  | 0.51  | 0.51  | 0.51  | 0.51  | 0.52  | 0.52  | 0.53  | 0.53  | 0.54  | 0.54  | 0.55  | 0.56  | 0.57  | 0.57  | 0.57  | 0.57  | 0.57  |
| -0.1                           | 0.794 | 0.51                                                 | 0.51  | 0.51  | 0.51  | 0.51  | 0.51  | 0.51  | 0.51  | 0.51  | 0.51  | 0.51  | 0.51  | 0.51  | 0.51  | 0.51  | 0.52  | 0.52  | 0.53  | 0.53  | 0.54  | 0.54  | 0.55  | 0.56  | 0.56  | 0.56  | 0.57  | 0.57  |
| 0                              | 1.000 | 0.51                                                 | 0.51  | 0.51  | 0.51  | 0.51  | 0.51  | 0.51  | 0.51  | 0.51  | 0.51  | 0.51  | 0.51  | 0.51  | 0.51  | 0.51  | 0.52  | 0.52  | 0.53  | 0.53  | 0.54  | 0.54  | 0.55  | 0.55  | 0.55  | 0.55  | 0.55  | 0.56  |
| 1.259                          |       | 0.51                                                 | 0.51  | 0.51  | 0.51  | 0.51  | 0.51  | 0.51  | 0.51  | 0.51  | 0.51  | 0.51  | 0.51  | 0.51  | 0.51  | 0.51  | 0.52  | 0.52  | 0.53  | 0.53  | 0.54  | 0.54  | 0.55  | 0.55  | 0.55  | 0.55  | 0.55  | 0.55  |
| 1.585                          |       | 0.51                                                 | 0.51  | 0.51  | 0.51  | 0.51  | 0.51  | 0.51  | 0.51  | 0.51  | 0.51  | 0.51  | 0.51  | 0.51  | 0.51  | 0.51  | 0.52  | 0.52  | 0.53  | 0.53  | 0.54  | 0.54  | 0.55  | 0.55  | 0.55  | 0.55  | 0.55  | 0.55  |
| 1.995                          |       | 0.51                                                 | 0.51  | 0.51  | 0.51  | 0.51  | 0.51  | 0.51  | 0.51  | 0.51  | 0.51  | 0.51  | 0.51  | 0.51  | 0.51  | 0.51  | 0.52  | 0.52  | 0.53  | 0.53  | 0.54  | 0.54  | 0.55  | 0.55  | 0.55  | 0.55  | 0.55  | 0.55  |
| 2.512                          |       | 0.50                                                 | 0.50  | 0.50  | 0.50  | 0.50  | 0.50  | 0.50  | 0.51  | 0.51  | 0.51  | 0.51  | 0.51  | 0.51  | 0.51  | 0.51  | 0.52  | 0.52  | 0.53  | 0.53  | 0.53  | 0.53  | 0.53  | 0.53  | 0.53  | 0.53  | 0.53  | 0.53  |
| 3.162                          |       | 0.50                                                 | 0.50  | 0.50  | 0.50  | 0.50  | 0.50  | 0.50  | 0.50  | 0.50  | 0.50  | 0.50  | 0.51  | 0.51  | 0.51  | 0.51  | 0.51  | 0.52  | 0.52  | 0.52  | 0.52  | 0.52  | 0.52  | 0.52  | 0.52  | 0.52  | 0.52  | 0.52  |
| 3.981                          |       | 0.50                                                 | 0.50  | 0.50  | 0.50  | 0.50  | 0.50  | 0.50  | 0.50  | 0.50  | 0.50  | 0.50  | 0.50  | 0.50  | 0.50  | 0.50  | 0.50  | 0.50  | 0.51  | 0.51  | 0.51  | 0.51  | 0.51  | 0.51  | 0.51  | 0.51  | 0.51  | 0.51  |
| 5.012                          |       | 0.50                                                 | 0.50  | 0.50  | 0.50  | 0.50  | 0.50  | 0.50  | 0.50  | 0.50  | 0.50  | 0.50  | 0.50  | 0.50  | 0.50  | 0.50  | 0.50  | 0.50  | 0.50  | 0.50  | 0.50  | 0.50  | 0.50  | 0.50  | 0.50  | 0.50  | 0.50  | 0.50  |
| 6.310                          |       | 0.50                                                 | 0.50  | 0.50  | 0.50  | 0.50  | 0.50  | 0.50  | 0.50  | 0.50  | 0.50  | 0.50  | 0.50  | 0.50  | 0.50  | 0.50  | 0.50  | 0.50  | 0.50  | 0.50  | 0.50  | 0.50  | 0.50  | 0.50  | 0.50  | 0.50  | 0.50  | 0.50  |
| 7.943                          |       | 0.50                                                 | 0.50  | 0.50  | 0.50  | 0.50  | 0.50  | 0.50  | 0.50  | 0.50  | 0.50  | 0.50  | 0.50  | 0.50  | 0.50  | 0.50  | 0.50  | 0.50  | 0.50  | 0.50  | 0.50  | 0.50  | 0.50  | 0.50  | 0.50  | 0.50  | 0.50  | 0.50  |
| 10.000                         |       | 0.50                                                 | 0.50  | 0.50  | 0.50  | 0.50  | 0.50  | 0.50  | 0.50  | 0.50  | 0.50  | 0.50  | 0.50  | 0.50  | 0.50  | 0.50  | 0.50  | 0.50  | 0.50  | 0.50  | 0.50  | 0.50  | 0.50  | 0.50  | 0.50  | 0.50  | 0.50  | 0.50  |
| 12.589                         |       | 0.50                                                 | 0.50  | 0.50  | 0.50  | 0.50  | 0.50  | 0.50  | 0.50  | 0.50  | 0.50  | 0.50  | 0.50  | 0.50  | 0.50  | 0.50  | 0.50  | 0.50  | 0.50  | 0.50  | 0.50  | 0.50  | 0.50  | 0.50  | 0.50  | 0.50  | 0.50  | 0.50  |
| 15.849                         |       | 0.50                                                 | 0.50  | 0.50  | 0.50  | 0.50  | 0.50  | 0.50  | 0.50  | 0.50  | 0.50  | 0.50  | 0.50  | 0.50  | 0.50  | 0.50  | 0.50  | 0.50  | 0.50  | 0.50  | 0.50  | 0.50  | 0.50  | 0.50  | 0.50  | 0.50  | 0.50  | 0.50  |
| 19.953                         |       | 0.50                                                 | 0.50  | 0.50  | 0.50  | 0.50  | 0.50  | 0.50  | 0.50  | 0.50  | 0.50  | 0.50  | 0.50  | 0.50  | 0.50  | 0.50  | 0.50  | 0.50  | 0.50  | 0.50  | 0.50  | 0.50  | 0.50  | 0.50  | 0.50  | 0.50  | 0.50  | 0.50  |
| 25.119                         |       | 0.50                                                 | 0.50  | 0.50  | 0.50  | 0.50  | 0.50  | 0.50  | 0.50  | 0.50  | 0.50  | 0.50  | 0.50  | 0.50  | 0.50  | 0.50  | 0.50  | 0.50  | 0.50  | 0.50  | 0.50  | 0.50  | 0.50  | 0.50  | 0.50  | 0.50  | 0.50  | 0.50  |
| 31.623                         |       | 0.50                                                 | 0.50  | 0.50  | 0.50  | 0.50  | 0.50  | 0.50  | 0.50  | 0.50  | 0.50  | 0.50  | 0.50  | 0.50  | 0.50  | 0.50  | 0.50  | 0.50  | 0.50  | 0.50  | 0.50  | 0.50  | 0.50  | 0.50  | 0.50  | 0.50  | 0.50  | 0.50  |
| 39.811                         |       | 0.50                                                 | 0.50  | 0.50  | 0.50  | 0.50  | 0.50  | 0.50  | 0.50  | 0.50  | 0.50  | 0.50  | 0.50  | 0.50  | 0.50  | 0.50  | 0.50  | 0.50  | 0.50  | 0.50  | 0.50  | 0.50  | 0.50  | 0.50  | 0.50  | 0.50  | 0.50  | 0.50  |
| 50.119                         |       | 0.50                                                 | 0.50  | 0.50  | 0.50  | 0.50  | 0.50  | 0.50  | 0.50  | 0.50  | 0.50  | 0.50  | 0.50  | 0.50  | 0.50  | 0.50  | 0.50  | 0.50  | 0.50  | 0.50  | 0.50  | 0.50  | 0.50  | 0.50  | 0.50  | 0.50  | 0.50  | 0.50  |
| 63.096                         |       | 0.50                                                 | 0.50  | 0.50  | 0.50  | 0.50  | 0.50  | 0.50  | 0.50  | 0.50  | 0.50  | 0.50  | 0.50  | 0.50  | 0.50  | 0.50  | 0.50  | 0.50  | 0.50  | 0.50  | 0.50  | 0.50  | 0.50  | 0.50  | 0.50  | 0.50  | 0.50  | 0.50  |
| 79.433                         |       | 0.50                                                 | 0.50  | 0.50  | 0.50  | 0.50  | 0.50  | 0.50  | 0.50  | 0.50  | 0.50  | 0.50  | 0.50  | 0.50  | 0.50  | 0.50  | 0.50  | 0.50  | 0.50  | 0.50  | 0.50  | 0.50  | 0.50  | 0.50  | 0.50  | 0.50  | 0.50  | 0.50  |
| ###                            |       | 0.50                                                 | 0.50  | 0.50  | 0.50  | 0.50  | 0.50  | 0.50  | 0.50  | 0.50  | 0.50  | 0.50  | 0.50  | 0.50  | 0.50  | 0.50  | 0.50  | 0.50  | 0.50  | 0.50  | 0.50  | 0.50  | 0.50  | 0.50  | 0.50  | 0.50  | 0.50  | 0.50  |

Table 1C: Interpolation table for the correction factor  $C$ , with Poisson's ratio  $\nu = 0.3$ .

| Indenter radius ratio, $R_p/R$ |        | Shell Thickness ratio, $h/R$                         |       |       |       |       |       |       |       |       |       |       |       |       |       |       |       |       |       |       |       |       |       |       |       |       |       |       |      |
|--------------------------------|--------|------------------------------------------------------|-------|-------|-------|-------|-------|-------|-------|-------|-------|-------|-------|-------|-------|-------|-------|-------|-------|-------|-------|-------|-------|-------|-------|-------|-------|-------|------|
|                                |        | Logarithm of shell thickness ratio, $\log_{10}(h/R)$ |       |       |       |       |       |       |       |       |       |       |       |       |       |       |       |       |       |       |       |       |       |       |       |       |       |       |      |
|                                |        |                                                      |       |       |       |       |       |       |       |       |       |       |       |       |       |       |       |       |       |       |       |       |       |       |       |       |       |       |      |
|                                |        | -2.00                                                | -1.95 | -1.90 | -1.85 | -1.80 | -1.75 | -1.70 | -1.65 | -1.60 | -1.55 | -1.50 | -1.45 | -1.40 | -1.35 | -1.30 | -1.25 | -1.20 | -1.15 | -1.10 | -1.05 | -1.00 | -0.95 | -0.90 | -0.85 | -0.80 | -0.75 | -0.70 |      |
| -1.7                           | 0.020  | 0.52                                                 | 0.53  | 0.53  | 0.53  | 0.53  | 0.54  | 0.54  | 0.55  | 0.55  | 0.56  | 0.57  | 0.58  | 0.59  | 0.59  | 0.60  | 0.61  | 0.62  | 0.63  | 0.64  | 0.66  | 0.68  | 0.69  | 0.70  | 0.72  | 0.73  | 0.74  | 0.75  |      |
| -1.6                           | 0.025  | 0.52                                                 | 0.52  | 0.53  | 0.53  | 0.53  | 0.53  | 0.54  | 0.54  | 0.55  | 0.56  | 0.57  | 0.58  | 0.59  | 0.59  | 0.60  | 0.61  | 0.62  | 0.63  | 0.64  | 0.65  | 0.66  | 0.68  | 0.69  | 0.70  | 0.71  | 0.72  | 0.73  | 0.74 |
| -1.5                           | 0.032  | 0.52                                                 | 0.52  | 0.53  | 0.53  | 0.53  | 0.53  | 0.54  | 0.55  | 0.56  | 0.57  | 0.57  | 0.58  | 0.59  | 0.59  | 0.60  | 0.61  | 0.62  | 0.63  | 0.64  | 0.65  | 0.67  | 0.68  | 0.69  | 0.70  | 0.71  | 0.72  | 0.73  | 0.74 |
| -1.4                           | 0.040  | 0.52                                                 | 0.52  | 0.52  | 0.53  | 0.53  | 0.53  | 0.53  | 0.54  | 0.55  | 0.56  | 0.57  | 0.58  | 0.59  | 0.59  | 0.60  | 0.61  | 0.62  | 0.63  | 0.64  | 0.65  | 0.67  | 0.68  | 0.69  | 0.70  | 0.71  | 0.72  | 0.73  | 0.74 |
| -1.3                           | 0.050  | 0.52                                                 | 0.52  | 0.52  | 0.53  | 0.53  | 0.53  | 0.54  | 0.54  | 0.55  | 0.56  | 0.57  | 0.57  | 0.58  | 0.58  | 0.59  | 0.60  | 0.61  | 0.62  | 0.63  | 0.64  | 0.65  | 0.66  | 0.67  | 0.68  | 0.69  | 0.70  | 0.71  | 0.72 |
| -1.2                           | 0.063  | 0.52                                                 | 0.52  | 0.52  | 0.52  | 0.52  | 0.53  | 0.54  | 0.54  | 0.55  | 0.56  | 0.57  | 0.57  | 0.58  | 0.58  | 0.59  | 0.60  | 0.61  | 0.62  | 0.63  | 0.64  | 0.65  | 0.66  | 0.67  | 0.68  | 0.69  | 0.70  | 0.71  | 0.72 |
| -1.1                           | 0.079  | 0.52                                                 | 0.52  | 0.52  | 0.52  | 0.52  | 0.52  | 0.53  | 0.54  | 0.54  | 0.55  | 0.56  | 0.57  | 0.58  | 0.58  | 0.59  | 0.60  | 0.61  | 0.62  | 0.63  | 0.64  | 0.65  | 0.66  | 0.67  | 0.68  | 0.69  | 0.70  | 0.71  | 0.72 |
| -1.0                           | 0.100  | 0.52                                                 | 0.52  | 0.52  | 0.52  | 0.52  | 0.52  | 0.52  | 0.53  | 0.53  | 0.54  | 0.54  | 0.55  | 0.56  | 0.57  | 0.58  | 0.59  | 0.60  | 0.61  | 0.62  | 0.63  | 0.64  | 0.65  | 0.66  | 0.67  | 0.68  | 0.69  | 0.70  | 0.71 |
| -0.9                           | 0.126  | 0.51                                                 | 0.52  | 0.52  | 0.52  | 0.52  | 0.52  | 0.52  | 0.52  | 0.53  | 0.53  | 0.54  | 0.54  | 0.55  | 0.56  | 0.57  | 0.58  | 0.59  | 0.60  | 0.61  | 0.62  | 0.63  | 0.64  | 0.65  | 0.66  | 0.67  | 0.68  | 0.69  | 0.70 |
| -0.8                           | 0.158  | 0.51                                                 | 0.51  | 0.52  | 0.52  | 0.52  | 0.52  | 0.52  | 0.52  | 0.52  | 0.53  | 0.53  | 0.54  | 0.54  | 0.55  | 0.56  | 0.57  | 0.58  | 0.59  | 0.60  | 0.61  | 0.62  | 0.63  | 0.64  | 0.65  | 0.66  | 0.66  | 0.66  | 0.66 |
| -0.7                           | 0.200  | 0.51                                                 | 0.51  | 0.51  | 0.51  | 0.51  | 0.51  | 0.51  | 0.52  | 0.52  | 0.52  | 0.53  | 0.53  | 0.54  | 0.54  | 0.55  | 0.56  | 0.57  | 0.58  | 0.59  | 0.60  | 0.61  | 0.62  | 0.63  | 0.63  | 0.63  | 0.64  | 0.64  | 0.65 |
| -0.6                           | 0.251  | 0.51                                                 | 0.51  | 0.51  | 0.51  | 0.51  | 0.51  | 0.51  | 0.51  | 0.52  | 0.52  | 0.52  | 0.53  | 0.53  | 0.53  | 0.54  | 0.55  | 0.56  | 0.57  | 0.58  | 0.59  | 0.60  | 0.61  | 0.62  | 0.62  | 0.63  | 0.63  | 0.63  | 0.64 |
| -0.5                           | 0.316  | 0.51                                                 | 0.51  | 0.51  | 0.51  | 0.51  | 0.51  | 0.51  | 0.51  | 0.51  | 0.52  | 0.52  | 0.52  | 0.53  | 0.53  | 0.53  | 0.54  | 0.55  | 0.56  | 0.57  | 0.58  | 0.59  | 0.60  | 0.61  | 0.61  | 0.62  | 0.62  | 0.62  | 0.62 |
| -0.4                           | 0.398  | 0.51                                                 | 0.51  | 0.51  | 0.51  | 0.51  | 0.51  | 0.51  | 0.51  | 0.51  | 0.51  | 0.52  | 0.52  | 0.52  | 0.53  | 0.53  | 0.54  | 0.54  | 0.55  | 0.56  | 0.57  | 0.58  | 0.59  | 0.60  | 0.60  | 0.61  | 0.61  | 0.61  | 0.61 |
| -0.3                           | 0.501  | 0.51                                                 | 0.51  | 0.51  | 0.51  | 0.51  | 0.51  | 0.51  | 0.51  | 0.51  | 0.51  | 0.51  | 0.52  | 0.52  | 0.52  | 0.53  | 0.54  | 0.54  | 0.55  | 0.56  | 0.57  | 0.58  | 0.59  | 0.59  | 0.60  | 0.60  | 0.60  | 0.60  | 0.60 |
| -0.2                           | 0.631  | 0.51                                                 | 0.51  | 0.51  | 0.51  | 0.51  | 0.51  | 0.51  | 0.51  | 0.51  | 0.51  | 0.51  | 0.51  | 0.51  | 0.51  | 0.52  | 0.53  | 0.54  | 0.54  | 0.55  | 0.56  | 0.57  | 0.57  | 0.58  | 0.58  | 0.58  | 0.58  | 0.58  | 0.58 |
| -0.1                           | 0.794  | 0.51                                                 | 0.51  | 0.51  | 0.51  | 0.51  | 0.51  | 0.51  | 0.51  | 0.51  | 0.51  | 0.51  | 0.51  | 0.51  | 0.51  | 0.51  | 0.52  | 0.53  | 0.54  | 0.54  | 0.55  | 0.56  | 0.56  | 0.56  | 0.56  | 0.57  | 0.57  | 0.57  | 0.57 |
| 0                              | 1.000  | 0.51                                                 | 0.51  | 0.51  | 0.51  | 0.51  | 0.51  | 0.51  | 0.51  | 0.51  | 0.51  | 0.51  | 0.51  | 0.51  | 0.51  | 0.51  | 0.51  | 0.52  | 0.53  | 0.54  | 0.54  | 0.55  | 0.55  | 0.55  | 0.55  | 0.55  | 0.55  | 0.55  | 0.55 |
| 0.1                            | 1.259  | 0.51                                                 | 0.51  | 0.51  | 0.51  | 0.51  | 0.51  | 0.51  | 0.51  | 0.51  | 0.51  | 0.51  | 0.51  | 0.51  | 0.51  | 0.51  | 0.51  | 0.51  | 0.52  | 0.53  | 0.54  | 0.54  | 0.55  | 0.55  | 0.55  | 0.55  | 0.55  | 0.55  | 0.55 |
| 0.2                            | 1.585  | 0.51                                                 | 0.51  | 0.51  | 0.51  | 0.50  | 0.50  | 0.50  | 0.51  | 0.51  | 0.51  | 0.51  | 0.51  | 0.51  | 0.51  | 0.51  | 0.51  | 0.51  | 0.51  | 0.52  | 0.52  | 0.53  | 0.53  | 0.53  | 0.53  | 0.53  | 0.53  | 0.53  | 0.53 |
| 0.3                            | 1.995  | 0.51                                                 | 0.50  | 0.50  | 0.50  | 0.50  | 0.50  | 0.50  | 0.51  | 0.51  | 0.51  | 0.51  | 0.51  | 0.51  | 0.51  | 0.51  | 0.51  | 0.51  | 0.51  | 0.51  | 0.52  | 0.52  | 0.53  | 0.53  | 0.53  | 0.53  | 0.54  | 0.54  | 0.54 |
| 0.4                            | 2.512  | 0.50                                                 | 0.50  | 0.50  | 0.50  | 0.50  | 0.50  | 0.50  | 0.50  | 0.50  | 0.50  | 0.51  | 0.51  | 0.51  | 0.51  | 0.51  | 0.51  | 0.51  | 0.51  | 0.51  | 0.51  | 0.52  | 0.52  | 0.52  | 0.53  | 0.53  | 0.53  | 0.53  | 0.53 |
| 0.5                            | 3.162  | 0.50                                                 | 0.50  | 0.50  | 0.50  | 0.50  | 0.50  | 0.50  | 0.50  | 0.50  | 0.50  | 0.50  | 0.50  | 0.50  | 0.50  | 0.50  | 0.51  | 0.51  | 0.51  | 0.51  | 0.51  | 0.51  | 0.51  | 0.52  | 0.52  | 0.52  | 0.52  | 0.52  | 0.52 |
| 0.6                            | 3.981  | 0.50                                                 | 0.50  | 0.50  | 0.50  | 0.50  | 0.50  | 0.50  | 0.50  | 0.50  | 0.50  | 0.50  | 0.50  | 0.50  | 0.50  | 0.50  | 0.50  | 0.50  | 0.50  | 0.51  | 0.51  | 0.51  | 0.51  | 0.51  | 0.51  | 0.51  | 0.51  | 0.51  | 0.51 |
| 0.7                            | 5.012  | 0.50                                                 | 0.50  | 0.50  | 0.50  | 0.50  | 0.50  | 0.50  | 0.50  | 0.50  | 0.50  | 0.50  | 0.50  | 0.50  | 0.50  | 0.50  | 0.50  | 0.50  | 0.50  | 0.50  | 0.50  | 0.50  | 0.50  | 0.50  | 0.50  | 0.51  | 0.51  | 0.51  | 0.51 |
| 0.8                            | 6.310  | 0.50                                                 | 0.50  | 0.50  | 0.50  | 0.50  | 0.50  | 0.50  | 0.50  | 0.50  | 0.50  | 0.50  | 0.50  | 0.50  | 0.50  | 0.50  | 0.50  | 0.50  | 0.50  | 0.50  | 0.50  | 0.50  | 0.50  | 0.50  | 0.50  | 0.51  | 0.51  | 0.51  | 0.51 |
| 0.9                            | 7.943  | 0.50                                                 | 0.50  | 0.50  | 0.50  | 0.50  | 0.50  | 0.50  | 0.50  | 0.50  | 0.50  | 0.50  | 0.50  | 0.50  | 0.50  | 0.50  | 0.50  | 0.50  | 0.50  | 0.50  | 0.50  | 0.50  | 0.50  | 0.50  | 0.50  | 0.51  | 0.51  | 0.51  | 0.51 |
| 1.0                            | 10.000 | 0.50                                                 | 0.50  | 0.50  | 0.50  | 0.50  | 0.50  | 0.50  | 0.50  | 0.50  | 0.50  | 0.50  | 0.50  | 0.50  | 0.50  | 0.50  | 0.50  | 0.50  | 0.50  | 0.50  | 0.50  | 0.50  | 0.50  | 0.50  | 0.50  | 0.51  | 0.51  | 0.51  | 0.51 |
| 1.1                            | 12.589 | 0.50                                                 | 0.50  | 0.50  | 0.50  | 0.50  | 0.50  | 0.50  | 0.50  | 0.50  | 0.50  | 0.50  | 0.50  | 0.50  | 0.50  | 0.50  | 0.50  | 0.50  | 0.50  | 0.50  | 0.50  | 0.50  | 0.50  | 0.50  | 0.50  | 0.51  | 0.51  | 0.51  | 0.51 |
| 1.2                            | 15.849 | 0.50                                                 | 0.50  | 0.50  | 0.50  | 0.50  | 0.50  | 0.50  | 0.50  | 0.50  | 0.50  | 0.50  | 0.50  | 0.50  | 0.50  | 0.50  | 0.50  | 0.50  | 0.50  | 0.50  | 0.50  | 0.50  | 0.50  | 0.50  | 0.50  | 0.50  | 0.50  | 0.50  | 0.50 |
| 1.3                            | 19.953 | 0.50                                                 | 0.50  | 0.50  | 0.50  | 0.50  | 0.50  | 0.50  | 0.50  | 0.50  | 0.50  | 0.50  | 0.50  | 0.50  | 0.50  | 0.50  | 0.50  | 0.50  | 0.50  | 0.50  | 0.50  | 0.50  | 0.50  | 0.50  | 0.50  | 0.50  | 0.50  | 0.50  | 0.50 |
| 1.4                            | 25.119 | 0.50                                                 | 0.50  | 0.50  | 0.50  | 0.50  | 0.50  | 0.50  | 0.50  | 0.50  | 0.50  | 0.50  | 0.50  | 0.50  | 0.50  | 0.50  | 0.50  | 0.50  | 0.50  | 0.50  | 0.50  | 0.50  | 0.50  | 0.50  | 0.50  | 0.50  | 0.50  | 0.50  | 0.50 |
| 1.5                            | 31.623 | 0.50                                                 | 0.50  | 0.50  | 0.50  | 0.50  | 0.50  | 0.50  | 0.50  | 0.50  | 0.50  | 0.50  | 0.50  | 0.50  | 0.50  | 0.50  | 0.50  | 0.50  | 0.50  | 0.50  | 0.50  | 0.50  | 0.50  | 0.50  | 0.50  | 0.50  | 0.50  | 0.50  | 0.50 |
| 1.6                            | 39.811 | 0.50                                                 | 0.50  | 0.50  | 0.50  | 0.50  | 0.50  | 0.50  | 0.50  | 0.50  | 0.50  | 0.50  | 0.50  | 0.50  | 0.50  | 0.50  | 0.50  | 0.50  | 0.50  | 0.50  | 0.50  | 0.50  | 0.50  | 0.50  | 0.50  | 0.50  | 0.50  | 0.50  | 0.50 |
| 1.7                            | 50.119 | 0.50                                                 | 0.50  | 0.50  | 0.50  | 0.50  | 0.50  | 0.50  | 0.50  | 0.50  | 0.50  | 0.50  | 0.50  | 0.50  | 0.50  | 0.50  | 0.50  | 0.50  | 0.50  | 0.50  | 0.50  | 0.50  | 0.50  | 0.50  | 0.50  | 0.50  | 0.50  | 0.50  | 0.50 |
| 1.8                            | 63.096 | 0.50                                                 | 0.50  | 0.50  | 0.50  | 0.50  | 0.50  | 0.50  | 0.50  | 0.50  | 0.50  | 0.50  | 0.50  | 0.50  | 0.50  | 0.50  | 0.50  | 0.50  | 0.50  | 0.50  | 0.50  | 0.50  | 0.50  | 0.50  | 0.50  | 0.50  | 0.50  | 0.50  | 0.50 |
| 1.9                            | 79.433 | 0.50                                                 | 0.50  | 0.50  | 0.50  | 0.50  | 0.50  | 0.50  | 0.50  | 0.50  | 0.50  | 0.50  | 0.50  | 0.50  | 0.50  | 0.50  | 0.50  | 0.50  | 0.50  | 0.50  | 0.50  | 0.50  | 0.50  | 0.50  | 0.50  | 0.50  | 0.50  | 0.50  | 0.50 |
| 2                              | ##     | 0.50                                                 | 0.50  | 0.50  | 0.50  | 0.50  | 0.50  | 0.50  | 0.50  | 0.50  | 0.50  | 0.50  | 0.50  | 0.50  | 0.50  | 0.50  | 0.50  | 0.50  | 0.50  | 0.50  | 0.50  | 0.50  | 0.50  | 0.50  | 0.50  | 0.50  | 0.50  | 0.50  | 0.50 |

Table 1D: Interpolation table for the correction factor  $C$ , with Poisson's ratio  $\nu = 0.4$ .

|                                |                    | Shell Thickness ratio, $h/R$ |       |       |       |       |       |       |       |       |       |       |       |       |       |       |       |       |       |       |       |       |       |       |       |       |       |       |       |       |       |       |       |       |       |       |       |       |       |       |       |       |      |      |      |      |      |
|--------------------------------|--------------------|------------------------------|-------|-------|-------|-------|-------|-------|-------|-------|-------|-------|-------|-------|-------|-------|-------|-------|-------|-------|-------|-------|-------|-------|-------|-------|-------|-------|-------|-------|-------|-------|-------|-------|-------|-------|-------|-------|-------|-------|-------|-------|------|------|------|------|------|
|                                |                    | 0.010                        | 0.011 | 0.013 | 0.014 | 0.016 | 0.018 | 0.020 | 0.022 | 0.025 | 0.028 | 0.032 | 0.035 | 0.040 | 0.045 | 0.050 | 0.056 | 0.063 | 0.071 | 0.079 | 0.089 | 0.100 | 0.112 | 0.126 | 0.141 | 0.158 | 0.178 | 0.200 | 0.224 | 0.251 | 0.282 | 0.316 | 0.355 | 0.398 | 0.447 | 0.501 | 0.562 | 0.631 | 0.708 | 0.794 | 0.891 | 1.000 |      |      |      |      |      |
| Indenter radius ratio, $R_p/R$ | $\log_{10}(R_p/R)$ | $\log_{10}(h/R)$             |       |       |       |       |       |       |       |       |       |       |       |       |       |       |       |       |       |       |       |       |       |       |       |       |       |       |       |       |       |       |       |       |       |       |       |       |       |       |       |       |      |      |      |      |      |
|                                |                    | -2.00                        | -1.95 | -1.90 | -1.85 | -1.80 | -1.75 | -1.70 | -1.65 | -1.60 | -1.55 | -1.50 | -1.45 | -1.40 | -1.35 | -1.30 | -1.25 | -1.20 | -1.15 | -1.10 | -1.05 | -0.95 | -0.90 | -0.85 | -0.80 | -0.75 | -0.70 | -0.65 | -0.60 | -0.55 | -0.50 | -0.45 | -0.40 | -0.35 | -0.30 | -0.25 | -0.20 | -0.15 | -0.10 | -0.05 | 0.00  |       |      |      |      |      |      |
| 0.020                          |                    | -1.7                         | 1.03  | 1.04  | 1.05  | 1.06  | 1.06  | 1.08  | 1.09  | 1.10  | 1.12  | 1.13  | 1.14  | 1.16  | 1.17  | 1.18  | 1.20  | 1.22  | 1.25  | 1.27  | 1.29  | 1.31  | 1.34  | 1.36  | 1.38  | 1.41  | 1.43  | 1.45  | 1.47  | 1.48  | 1.49  | 1.49  | 1.50  | 1.50  | 1.50  | 1.50  | 1.50  | 1.50  | 1.50  | 1.50  | 1.50  | 1.50  | 1.50 | 1.50 | 1.50 |      |      |
| 0.025                          |                    | -1.6                         | 1.03  | 1.04  | 1.05  | 1.06  | 1.06  | 1.07  | 1.09  | 1.10  | 1.11  | 1.13  | 1.14  | 1.15  | 1.17  | 1.18  | 1.19  | 1.22  | 1.24  | 1.26  | 1.28  | 1.30  | 1.33  | 1.35  | 1.38  | 1.40  | 1.43  | 1.44  | 1.46  | 1.48  | 1.49  | 1.49  | 1.49  | 1.50  | 1.50  | 1.50  | 1.50  | 1.50  | 1.50  | 1.50  | 1.50  | 1.50  | 1.50 | 1.50 | 1.50 | 1.50 | 1.50 |
| 0.032                          |                    | -1.5                         | 1.03  | 1.04  | 1.05  | 1.06  | 1.06  | 1.07  | 1.09  | 1.10  | 1.11  | 1.13  | 1.14  | 1.15  | 1.16  | 1.17  | 1.19  | 1.21  | 1.23  | 1.25  | 1.27  | 1.30  | 1.32  | 1.34  | 1.37  | 1.39  | 1.42  | 1.44  | 1.45  | 1.47  | 1.48  | 1.48  | 1.49  | 1.50  | 1.50  | 1.50  | 1.50  | 1.50  | 1.50  | 1.50  | 1.50  | 1.50  | 1.50 | 1.50 | 1.50 | 1.50 | 1.50 |
| 0.040                          |                    | -1.4                         | 1.03  | 1.03  | 1.04  | 1.05  | 1.05  | 1.06  | 1.07  | 1.08  | 1.10  | 1.11  | 1.12  | 1.13  | 1.14  | 1.15  | 1.16  | 1.18  | 1.20  | 1.22  | 1.24  | 1.26  | 1.29  | 1.31  | 1.33  | 1.36  | 1.38  | 1.41  | 1.43  | 1.45  | 1.47  | 1.48  | 1.48  | 1.49  | 1.50  | 1.50  | 1.50  | 1.50  | 1.50  | 1.50  | 1.50  | 1.50  | 1.50 | 1.50 | 1.50 | 1.50 | 1.50 |
| 0.050                          |                    | -1.3                         | 1.03  | 1.03  | 1.04  | 1.05  | 1.05  | 1.07  | 1.08  | 1.09  | 1.11  | 1.12  | 1.13  | 1.14  | 1.15  | 1.17  | 1.19  | 1.21  | 1.23  | 1.25  | 1.28  | 1.30  | 1.33  | 1.35  | 1.38  | 1.40  | 1.42  | 1.44  | 1.46  | 1.47  | 1.48  | 1.49  | 1.50  | 1.50  | 1.50  | 1.50  | 1.50  | 1.50  | 1.50  | 1.50  | 1.50  | 1.50  | 1.50 | 1.50 | 1.50 | 1.50 | 1.50 |
| 0.063                          |                    | -1.2                         | 1.03  | 1.03  | 1.04  | 1.05  | 1.05  | 1.06  | 1.08  | 1.09  | 1.10  | 1.11  | 1.12  | 1.13  | 1.14  | 1.15  | 1.16  | 1.18  | 1.20  | 1.22  | 1.24  | 1.27  | 1.29  | 1.32  | 1.34  | 1.37  | 1.39  | 1.41  | 1.44  | 1.45  | 1.46  | 1.47  | 1.48  | 1.49  | 1.50  | 1.50  | 1.50  | 1.50  | 1.50  | 1.50  | 1.50  | 1.50  | 1.50 | 1.50 | 1.50 | 1.50 | 1.50 |
| 0.079                          |                    | -1.1                         | 1.02  | 1.03  | 1.03  | 1.04  | 1.04  | 1.05  | 1.07  | 1.08  | 1.09  | 1.10  | 1.11  | 1.12  | 1.13  | 1.14  | 1.15  | 1.17  | 1.19  | 1.21  | 1.24  | 1.26  | 1.28  | 1.31  | 1.33  | 1.36  | 1.39  | 1.41  | 1.43  | 1.45  | 1.46  | 1.47  | 1.48  | 1.49  | 1.50  | 1.50  | 1.50  | 1.50  | 1.50  | 1.50  | 1.50  | 1.50  | 1.50 | 1.50 | 1.50 | 1.50 | 1.50 |
| 0.100                          |                    | -1                           | 1.02  | 1.03  | 1.03  | 1.04  | 1.04  | 1.05  | 1.06  | 1.07  | 1.08  | 1.09  | 1.10  | 1.11  | 1.12  | 1.13  | 1.14  | 1.17  | 1.19  | 1.21  | 1.23  | 1.25  | 1.28  | 1.30  | 1.33  | 1.35  | 1.38  | 1.40  | 1.42  | 1.44  | 1.46  | 1.47  | 1.48  | 1.49  | 1.50  | 1.50  | 1.50  | 1.50  | 1.50  | 1.50  | 1.50  | 1.50  | 1.50 | 1.50 | 1.50 | 1.50 | 1.50 |
| 0.126                          |                    | -0.9                         | 1.02  | 1.03  | 1.03  | 1.04  | 1.04  | 1.05  | 1.06  | 1.07  | 1.08  | 1.09  | 1.10  | 1.11  | 1.12  | 1.13  | 1.14  | 1.16  | 1.18  | 1.20  | 1.22  | 1.24  | 1.27  | 1.29  | 1.32  | 1.34  | 1.37  | 1.39  | 1.41  | 1.43  | 1.45  | 1.46  | 1.47  | 1.48  | 1.50  | 1.50  | 1.50  | 1.50  | 1.50  | 1.50  | 1.50  | 1.50  | 1.50 | 1.50 | 1.50 | 1.50 | 1.50 |
| 0.158                          |                    | -0.8                         | 1.02  | 1.03  | 1.03  | 1.04  | 1.04  | 1.05  | 1.06  | 1.07  | 1.08  | 1.09  | 1.10  | 1.11  | 1.12  | 1.13  | 1.14  | 1.16  | 1.18  | 1.20  | 1.21  | 1.24  | 1.26  | 1.29  | 1.31  | 1.34  | 1.36  | 1.38  | 1.40  | 1.42  | 1.44  | 1.46  | 1.47  | 1.48  | 1.50  | 1.50  | 1.50  | 1.50  | 1.50  | 1.50  | 1.50  | 1.50  | 1.50 | 1.50 | 1.50 | 1.50 | 1.50 |
| 0.200                          |                    | -0.7                         | 1.02  | 1.03  | 1.03  | 1.04  | 1.04  | 1.05  | 1.06  | 1.07  | 1.08  | 1.09  | 1.10  | 1.11  | 1.12  | 1.13  | 1.15  | 1.17  | 1.19  | 1.21  | 1.23  | 1.26  | 1.28  | 1.30  | 1.33  | 1.35  | 1.38  | 1.40  | 1.42  | 1.44  | 1.46  | 1.48  | 1.50  | 1.50  | 1.50  | 1.50  | 1.50  | 1.50  | 1.50  | 1.50  | 1.50  | 1.50  | 1.50 | 1.50 | 1.50 | 1.50 | 1.50 |
| 0.251                          |                    | -0.6                         | 1.02  | 1.03  | 1.03  | 1.04  | 1.04  | 1.05  | 1.06  | 1.07  | 1.08  | 1.09  | 1.10  | 1.10  | 1.11  | 1.13  | 1.15  | 1.17  | 1.19  | 1.20  | 1.22  | 1.25  | 1.27  | 1.30  | 1.32  | 1.35  | 1.37  | 1.39  | 1.42  | 1.43  | 1.45  | 1.46  | 1.47  | 1.49  | 1.49  | 1.49  | 1.49  | 1.49  | 1.49  | 1.49  | 1.49  | 1.49  | 1.49 | 1.49 | 1.49 | 1.49 |      |
| 0.316                          |                    | -0.5                         | 1.02  | 1.03  | 1.03  | 1.04  | 1.04  | 1.05  | 1.06  | 1.07  | 1.08  | 1.09  | 1.10  | 1.11  | 1.12  | 1.15  | 1.16  | 1.18  | 1.19  | 1.22  | 1.24  | 1.26  | 1.29  | 1.31  | 1.34  | 1.36  | 1.38  | 1.41  | 1.43  | 1.44  | 1.45  | 1.47  | 1.49  | 1.49  | 1.49  | 1.49  | 1.49  | 1.49  | 1.49  | 1.49  | 1.49  | 1.49  | 1.49 | 1.49 | 1.49 | 1.49 |      |
| 0.398                          |                    | -0.4                         | 1.02  | 1.03  | 1.03  | 1.03  | 1.04  | 1.05  | 1.06  | 1.07  | 1.08  | 1.09  | 1.10  | 1.11  | 1.12  | 1.14  | 1.16  | 1.17  | 1.19  | 1.21  | 1.23  | 1.26  | 1.28  | 1.31  | 1.33  | 1.35  | 1.38  | 1.40  | 1.42  | 1.43  | 1.45  | 1.47  | 1.49  | 1.49  | 1.49  | 1.49  | 1.49  | 1.49  | 1.49  | 1.49  | 1.49  | 1.49  | 1.49 | 1.49 | 1.49 | 1.49 |      |
| 0.501                          |                    | -0.3                         | 1.02  | 1.03  | 1.03  | 1.03  | 1.04  | 1.05  | 1.06  | 1.07  | 1.08  | 1.09  | 1.10  | 1.12  | 1.14  | 1.15  | 1.17  | 1.18  | 1.20  | 1.23  | 1.25  | 1.27  | 1.30  | 1.32  | 1.35  | 1.37  | 1.40  | 1.42  | 1.43  | 1.45  | 1.47  | 1.49  | 1.49  | 1.49  | 1.49  | 1.49  | 1.49  | 1.49  | 1.49  | 1.49  | 1.49  | 1.49  | 1.49 | 1.49 | 1.49 | 1.49 |      |
| 0.631                          |                    | -0.2                         | 1.02  | 1.03  | 1.03  | 1.03  | 1.04  | 1.05  | 1.06  | 1.07  | 1.08  | 1.09  | 1.10  | 1.11  | 1.13  | 1.14  | 1.16  | 1.17  | 1.20  | 1.22  | 1.24  | 1.27  | 1.29  | 1.32  | 1.34  | 1.37  | 1.39  | 1.41  | 1.43  | 1.45  | 1.47  | 1.49  | 1.49  | 1.49  | 1.49  | 1.49  | 1.49  | 1.49  | 1.49  | 1.49  | 1.49  | 1.49  | 1.49 | 1.49 | 1.49 | 1.49 |      |
| 0.794                          |                    | -0.1                         | 1.02  | 1.03  | 1.03  | 1.03  | 1.04  | 1.04  | 1.05  | 1.06  | 1.07  | 1.08  | 1.09  | 1.10  | 1.12  | 1.14  | 1.15  | 1.17  | 1.19  | 1.21  | 1.23  | 1.26  | 1.28  | 1.31  | 1.33  | 1.36  | 1.39  | 1.41  | 1.43  | 1.45  | 1.47  | 1.49  | 1.49  | 1.49  | 1.49  | 1.49  | 1.49  | 1.49  | 1.49  | 1.49  | 1.49  | 1.49  | 1.49 | 1.49 | 1.49 |      |      |
| 1.000                          |                    | 0                            | 1.02  | 1.02  | 1.03  | 1.03  | 1.04  | 1.04  | 1.05  | 1.06  | 1.07  | 1.08  | 1.09  | 1.10  | 1.12  | 1.13  | 1.15  | 1.16  | 1.18  | 1.20  | 1.22  | 1.25  | 1.28  | 1.30  | 1.33  | 1.36  | 1.38  | 1.41  | 1.43  | 1.45  | 1.47  | 1.49  | 1.49  | 1.49  | 1.49  | 1.49  | 1.49  | 1.49  | 1.49  | 1.49  | 1.49  | 1.49  | 1.49 | 1.49 | 1.49 | 1.49 |      |
| 1.259                          |                    | 0.1                          | 1.02  | 1.03  | 1.03  | 1.03  | 1.04  | 1.04  | 1.05  | 1.06  | 1.07  | 1.08  | 1.09  | 1.10  | 1.12  | 1.13  | 1.15  | 1.16  | 1.18  | 1.20  | 1.22  | 1.25  | 1.27  | 1.30  | 1.33  | 1.35  | 1.38  | 1.40  | 1.42  | 1.44  | 1.46  | 1.48  | 1.49  | 1.49  | 1.49  | 1.49  | 1.49  | 1.49  | 1.49  | 1.49  | 1.49  | 1.49  | 1.49 | 1.49 | 1.49 | 1.49 |      |
| 1.585                          |                    | 0.2                          | 1.03  | 1.03  | 1.03  | 1.04  | 1.04  | 1.05  | 1.06  | 1.07  | 1.08  | 1.09  | 1.10  | 1.12  | 1.13  | 1.16  | 1.18  | 1.20  | 1.22  | 1.24  | 1.27  | 1.30  | 1.32  | 1.35  | 1.38  | 1.40  | 1.42  | 1.44  | 1.46  | 1.48  | 1.49  | 1.49  | 1.49  | 1.49  | 1.49  | 1.49  | 1.49  | 1.49  | 1.49  | 1.49  | 1.49  | 1.49  | 1.49 | 1.49 | 1.49 | 1.49 |      |
| 1.995                          |                    | 0.3                          | 1.03  | 1.03  | 1.04  | 1.04  | 1.04  | 1.05  | 1.06  | 1.07  | 1.08  | 1.09  | 1.10  | 1.12  | 1.13  | 1.14  | 1.16  | 1.18  | 1.20  | 1.22  | 1.24  | 1.27  | 1.29  | 1.32  | 1.35  | 1.37  | 1.40  | 1.42  | 1.44  | 1.46  | 1.48  | 1.49  | 1.49  | 1.49  | 1.49  | 1.49  | 1.49  | 1.49  | 1.49  | 1.49  | 1.49  | 1.49  | 1.49 | 1.49 | 1.49 | 1.49 |      |
| 2.512                          |                    | 0.4                          | 1.03  | 1.04  | 1.04  | 1.05  | 1.05  | 1.06  | 1.07  | 1.08  | 1.09  | 1.10  | 1.11  | 1.13  | 1.14  | 1.15  | 1.17  | 1.19  | 1.21  | 1.24  | 1.26  | 1.29  | 1.32  | 1.34  | 1.37  | 1.39  | 1.41  | 1.44  | 1.46  | 1.48  | 1.48  | 1.49  | 1.49  | 1.49  | 1.49  | 1.49  | 1.49  | 1.49  | 1.49  | 1.49  | 1.49  | 1.49  | 1.49 | 1.49 | 1.49 | 1.49 |      |
| 3.162                          |                    | 0.5                          | 1.04  | 1.04  | 1.05  | 1.05  | 1.06  | 1.07  | 1.08  | 1.09  | 1.10  | 1.11  | 1.13  | 1.14  | 1.15  | 1.17  | 1.19  | 1.21  | 1.24  | 1.26  | 1.28  | 1.31  | 1.34  | 1.37  | 1.39  | 1.41  | 1.43  | 1.46  | 1.48  | 1.48  | 1.49  | 1.49  | 1.49  | 1.49  | 1.49  | 1.49  | 1.49  | 1.49  | 1.49  | 1.49  | 1.49  | 1.49  | 1.49 | 1.49 | 1.49 | 1.49 |      |
| 3.981                          |                    | 0.6                          | 1.04  | 1.04  | 1.05  | 1.05  | 1.06  | 1.07  | 1.08  | 1.09  | 1.10  | 1.11  | 1.12  | 1.14  | 1.15  | 1.17  | 1.19  | 1.21  | 1.24  | 1.26  | 1.28  | 1.31  | 1.34  | 1.36  | 1.39  | 1.41  | 1.43  | 1.46  | 1.48  | 1.48  | 1.49  | 1.49  | 1.49  | 1.49  | 1.49  | 1.49  | 1.49  | 1.49  | 1.49  | 1.49  | 1.49  | 1.49  | 1.49 | 1.49 | 1.49 | 1.49 |      |
| 5.012                          |                    | 0.7                          | 1.04  | 1.04  | 1.05  | 1.05  | 1.06  | 1.07  | 1.08  | 1.09  | 1.10  | 1.11  | 1.12  | 1.13  | 1.15  | 1.17  | 1.18  | 1.20  | 1.23  | 1.25  | 1.28  | 1.30  | 1.33  | 1.36  | 1.39  | 1.41  | 1.43  | 1.45  | 1.48  | 1.48  | 1.49  | 1.49  | 1.49  | 1.49  | 1.49  | 1.49  | 1.49  | 1.49  | 1.49  | 1.49  | 1.49  | 1.49  | 1.49 | 1.49 | 1.49 | 1.49 |      |
| 6.310                          |                    | 0.8                          | 1.04  | 1.04  | 1.05  | 1.05  | 1.06  | 1.07  | 1.08  | 1.09  | 1.10  | 1.11  | 1.12  | 1.13  | 1.15  | 1.17  | 1.18  | 1.20  | 1.23  | 1.25  | 1.28  | 1.30  | 1.33  | 1.36  | 1.39  | 1.41  | 1.43  | 1.45  | 1.48  | 1.48  | 1.49  | 1.49  | 1.49  | 1.49  | 1.49  | 1.49  | 1.49  | 1.49  | 1.49  | 1.49  | 1.49  | 1.49  | 1.49 | 1.49 | 1.49 | 1.49 |      |
| 7.943                          |                    | 0.9                          | 1.04  | 1.04  | 1.05  | 1.05  | 1.06  | 1.07  | 1.08  | 1.09  | 1.10  | 1.11  | 1.12  | 1.13  | 1.15  | 1.16  | 1.18  | 1.20  | 1.23  | 1.25  | 1.28  | 1.30  | 1.33  | 1.36  | 1.39  | 1.41  | 1.43  | 1.45  | 1.48  | 1.48  | 1.49  | 1.49  | 1.49  | 1.49  | 1.49  | 1.49  | 1.49  | 1.49  | 1.49  | 1.49  | 1.49  | 1.49  | 1.49 | 1.49 | 1.49 | 1.49 |      |
| 10.000                         |                    | 1                            | 1.04  | 1.04  |       |       |       |       |       |       |       |       |       |       |       |       |       |       |       |       |       |       |       |       |       |       |       |       |       |       |       |       |       |       |       |       |       |       |       |       |       |       |      |      |      |      |      |

|                                |                                                        | Shell Thickness ratio, $h/R$                         |       |       |       |       |       |       |       |       |       |       |       |       |       |       |       |       |       |       |       |       |       |       |       |       |       |       |       |       |       |       |       |       |       |       |       |       |       |       |       |       |      |      |      |      |      |      |
|--------------------------------|--------------------------------------------------------|------------------------------------------------------|-------|-------|-------|-------|-------|-------|-------|-------|-------|-------|-------|-------|-------|-------|-------|-------|-------|-------|-------|-------|-------|-------|-------|-------|-------|-------|-------|-------|-------|-------|-------|-------|-------|-------|-------|-------|-------|-------|-------|-------|------|------|------|------|------|------|
|                                |                                                        | 0.010                                                | 0.011 | 0.013 | 0.014 | 0.016 | 0.018 | 0.020 | 0.022 | 0.025 | 0.028 | 0.032 | 0.035 | 0.040 | 0.045 | 0.050 | 0.056 | 0.063 | 0.071 | 0.079 | 0.089 | 0.100 | 0.112 | 0.126 | 0.141 | 0.158 | 0.178 | 0.200 | 0.224 | 0.251 | 0.282 | 0.316 | 0.355 | 0.398 | 0.447 | 0.501 | 0.562 | 0.631 | 0.708 | 0.794 | 0.891 | 1.000 |      |      |      |      |      |      |
| Indenter radius ratio, $R_p/R$ | Logarithm of indenter radius ratio, $\log_{10}(R_p/R)$ | Logarithm of shell thickness ratio, $\log_{10}(h/R)$ |       |       |       |       |       |       |       |       |       |       |       |       |       |       |       |       |       |       |       |       |       |       |       |       |       |       |       |       |       |       |       |       |       |       |       |       |       |       |       |       |      |      |      |      |      |      |
|                                |                                                        | -2.00                                                | -1.95 | -1.90 | -1.85 | -1.80 | -1.75 | -1.70 | -1.65 | -1.60 | -1.55 | -1.50 | -1.45 | -1.40 | -1.35 | -1.30 | -1.25 | -1.20 | -1.15 | -1.10 | -1.05 | -0.95 | -0.90 | -0.85 | -0.80 | -0.75 | -0.70 | -0.65 | -0.60 | -0.55 | -0.50 | -0.45 | -0.40 | -0.35 | -0.30 | -0.25 | -0.20 | -0.15 | -0.10 | -0.05 | 0.00  |       |      |      |      |      |      |      |
| 0.020                          |                                                        | -1.7                                                 | 1.03  | 1.04  | 1.05  | 1.06  | 1.06  | 1.08  | 1.09  | 1.10  | 1.12  | 1.13  | 1.14  | 1.16  | 1.17  | 1.18  | 1.20  | 1.22  | 1.24  | 1.26  | 1.29  | 1.31  | 1.33  | 1.35  | 1.37  | 1.40  | 1.42  | 1.44  | 1.46  | 1.48  | 1.49  | 1.49  | 1.50  | 1.50  | 1.50  | 1.50  | 1.50  | 1.50  | 1.50  | 1.50  | 1.50  | 1.50  | 1.50 | 1.50 | 1.50 |      |      |      |
| 0.025                          |                                                        | -1.6                                                 | 1.03  | 1.04  | 1.05  | 1.06  | 1.06  | 1.07  | 1.09  | 1.10  | 1.11  | 1.13  | 1.14  | 1.15  | 1.17  | 1.18  | 1.19  | 1.21  | 1.23  | 1.26  | 1.28  | 1.30  | 1.32  | 1.34  | 1.37  | 1.39  | 1.42  | 1.44  | 1.45  | 1.47  | 1.48  | 1.49  | 1.49  | 1.50  | 1.50  | 1.50  | 1.50  | 1.50  | 1.50  | 1.50  | 1.50  | 1.50  | 1.50 | 1.50 | 1.50 | 1.50 | 1.50 |      |
| 0.032                          |                                                        | -1.5                                                 | 1.03  | 1.04  | 1.05  | 1.05  | 1.06  | 1.07  | 1.08  | 1.10  | 1.11  | 1.12  | 1.14  | 1.15  | 1.16  | 1.17  | 1.18  | 1.21  | 1.23  | 1.25  | 1.27  | 1.29  | 1.31  | 1.34  | 1.36  | 1.38  | 1.41  | 1.43  | 1.45  | 1.46  | 1.48  | 1.48  | 1.49  | 1.50  | 1.50  | 1.50  | 1.50  | 1.50  | 1.50  | 1.50  | 1.50  | 1.50  | 1.50 | 1.50 | 1.50 | 1.50 | 1.50 |      |
| 0.040                          |                                                        | -1.4                                                 | 1.03  | 1.03  | 1.04  | 1.05  | 1.05  | 1.07  | 1.08  | 1.09  | 1.11  | 1.12  | 1.13  | 1.14  | 1.15  | 1.16  | 1.18  | 1.20  | 1.22  | 1.24  | 1.26  | 1.28  | 1.30  | 1.33  | 1.35  | 1.38  | 1.40  | 1.42  | 1.44  | 1.46  | 1.47  | 1.48  | 1.49  | 1.50  | 1.50  | 1.50  | 1.50  | 1.50  | 1.50  | 1.50  | 1.50  | 1.50  | 1.50 | 1.50 | 1.50 | 1.50 | 1.50 | 1.50 |
| 0.050                          |                                                        | -1.3                                                 | 1.03  | 1.03  | 1.04  | 1.04  | 1.05  | 1.06  | 1.08  | 1.09  | 1.10  | 1.11  | 1.12  | 1.13  | 1.14  | 1.15  | 1.17  | 1.19  | 1.21  | 1.23  | 1.25  | 1.27  | 1.30  | 1.32  | 1.35  | 1.37  | 1.40  | 1.42  | 1.44  | 1.45  | 1.47  | 1.48  | 1.49  | 1.50  | 1.50  | 1.50  | 1.50  | 1.50  | 1.50  | 1.50  | 1.50  | 1.50  | 1.50 | 1.50 | 1.50 | 1.50 | 1.50 | 1.50 |
| 0.063                          |                                                        | -1.2                                                 | 1.03  | 1.03  | 1.04  | 1.04  | 1.05  | 1.06  | 1.07  | 1.09  | 1.10  | 1.11  | 1.12  | 1.13  | 1.14  | 1.15  | 1.16  | 1.18  | 1.20  | 1.22  | 1.24  | 1.26  | 1.29  | 1.31  | 1.34  | 1.36  | 1.39  | 1.41  | 1.43  | 1.45  | 1.46  | 1.48  | 1.49  | 1.50  | 1.50  | 1.50  | 1.50  | 1.50  | 1.50  | 1.50  | 1.50  | 1.50  | 1.50 | 1.50 | 1.50 | 1.50 | 1.50 | 1.50 |
| 0.079                          |                                                        | -1.1                                                 | 1.02  | 1.03  | 1.03  | 1.04  | 1.04  | 1.05  | 1.07  | 1.08  | 1.09  | 1.10  | 1.11  | 1.12  | 1.13  | 1.14  | 1.15  | 1.17  | 1.19  | 1.21  | 1.23  | 1.26  | 1.28  | 1.31  | 1.33  | 1.36  | 1.38  | 1.40  | 1.42  | 1.44  | 1.45  | 1.48  | 1.49  | 1.50  | 1.50  | 1.50  | 1.50  | 1.50  | 1.50  | 1.50  | 1.50  | 1.50  | 1.50 | 1.50 | 1.50 | 1.50 | 1.50 | 1.50 |
| 0.100                          |                                                        | -1                                                   | 1.02  | 1.03  | 1.03  | 1.04  | 1.04  | 1.05  | 1.06  | 1.07  | 1.08  | 1.09  | 1.10  | 1.11  | 1.12  | 1.13  | 1.14  | 1.16  | 1.18  | 1.20  | 1.22  | 1.25  | 1.27  | 1.30  | 1.32  | 1.35  | 1.37  | 1.39  | 1.42  | 1.44  | 1.45  | 1.48  | 1.49  | 1.50  | 1.50  | 1.50  | 1.50  | 1.50  | 1.50  | 1.50  | 1.50  | 1.50  | 1.50 | 1.50 | 1.50 | 1.50 | 1.50 | 1.50 |
| 0.126                          |                                                        | -0.9                                                 | 1.02  | 1.03  | 1.03  | 1.04  | 1.04  | 1.05  | 1.06  | 1.07  | 1.08  | 1.09  | 1.10  | 1.11  | 1.12  | 1.13  | 1.14  | 1.16  | 1.18  | 1.20  | 1.22  | 1.24  | 1.27  | 1.29  | 1.32  | 1.34  | 1.37  | 1.39  | 1.41  | 1.43  | 1.45  | 1.46  | 1.47  | 1.48  | 1.50  | 1.50  | 1.50  | 1.50  | 1.50  | 1.50  | 1.50  | 1.50  | 1.50 | 1.50 | 1.50 | 1.50 | 1.50 | 1.50 |
| 0.158                          |                                                        | -0.8                                                 | 1.02  | 1.03  | 1.03  | 1.04  | 1.04  | 1.05  | 1.06  | 1.07  | 1.08  | 1.09  | 1.10  | 1.11  | 1.12  | 1.13  | 1.14  | 1.16  | 1.18  | 1.20  | 1.22  | 1.24  | 1.26  | 1.28  | 1.31  | 1.33  | 1.36  | 1.38  | 1.40  | 1.42  | 1.44  | 1.45  | 1.47  | 1.48  | 1.50  | 1.50  | 1.50  | 1.50  | 1.50  | 1.50  | 1.50  | 1.50  | 1.50 | 1.50 | 1.50 | 1.50 | 1.50 | 1.50 |
| 0.200                          |                                                        | -0.7                                                 | 1.02  | 1.03  | 1.03  | 1.04  | 1.04  | 1.05  | 1.06  | 1.07  | 1.08  | 1.09  | 1.10  | 1.11  | 1.12  | 1.13  | 1.15  | 1.17  | 1.19  | 1.21  | 1.23  | 1.25  | 1.28  | 1.30  | 1.33  | 1.35  | 1.37  | 1.39  | 1.42  | 1.44  | 1.45  | 1.46  | 1.48  | 1.50  | 1.50  | 1.50  | 1.50  | 1.50  | 1.50  | 1.50  | 1.50  | 1.50  | 1.50 | 1.50 | 1.50 | 1.50 | 1.50 | 1.50 |
| 0.251                          |                                                        | -0.6                                                 | 1.02  | 1.03  | 1.03  | 1.04  | 1.04  | 1.05  | 1.06  | 1.07  | 1.08  | 1.09  | 1.10  | 1.11  | 1.13  | 1.15  | 1.17  | 1.18  | 1.20  | 1.22  | 1.25  | 1.27  | 1.29  | 1.32  | 1.34  | 1.37  | 1.39  | 1.41  | 1.43  | 1.44  | 1.46  | 1.47  | 1.49  | 1.49  | 1.49  | 1.49  | 1.49  | 1.49  | 1.49  | 1.49  | 1.49  | 1.49  | 1.49 | 1.49 | 1.49 | 1.49 | 1.49 |      |
| 0.316                          |                                                        | -0.5                                                 | 1.02  | 1.03  | 1.03  | 1.03  | 1.04  | 1.04  | 1.05  | 1.06  | 1.07  | 1.08  | 1.09  | 1.10  | 1.11  | 1.12  | 1.14  | 1.16  | 1.18  | 1.19  | 1.22  | 1.24  | 1.26  | 1.29  | 1.31  | 1.34  | 1.36  | 1.38  | 1.41  | 1.43  | 1.44  | 1.45  | 1.47  | 1.49  | 1.49  | 1.49  | 1.49  | 1.49  | 1.49  | 1.49  | 1.49  | 1.49  | 1.49 | 1.49 | 1.49 | 1.49 | 1.49 |      |
| 0.398                          |                                                        | -0.4                                                 | 1.02  | 1.03  | 1.03  | 1.03  | 1.04  | 1.04  | 1.05  | 1.06  | 1.07  | 1.08  | 1.09  | 1.10  | 1.11  | 1.12  | 1.14  | 1.16  | 1.17  | 1.19  | 1.21  | 1.23  | 1.25  | 1.28  | 1.30  | 1.33  | 1.35  | 1.38  | 1.40  | 1.42  | 1.43  | 1.45  | 1.47  | 1.49  | 1.49  | 1.49  | 1.49  | 1.49  | 1.49  | 1.49  | 1.49  | 1.49  | 1.49 | 1.49 | 1.49 | 1.49 | 1.49 |      |
| 0.501                          |                                                        | -0.3                                                 | 1.02  | 1.02  | 1.03  | 1.03  | 1.04  | 1.04  | 1.05  | 1.06  | 1.07  | 1.08  | 1.09  | 1.10  | 1.12  | 1.14  | 1.15  | 1.18  | 1.20  | 1.22  | 1.25  | 1.27  | 1.30  | 1.32  | 1.34  | 1.37  | 1.40  | 1.42  | 1.43  | 1.45  | 1.47  | 1.49  | 1.49  | 1.49  | 1.49  | 1.49  | 1.49  | 1.49  | 1.49  | 1.49  | 1.49  | 1.49  | 1.49 | 1.49 | 1.49 | 1.49 | 1.49 |      |
| 0.631                          |                                                        | -0.2                                                 | 1.02  | 1.03  | 1.03  | 1.03  | 1.04  | 1.04  | 1.05  | 1.06  | 1.07  | 1.08  | 1.09  | 1.10  | 1.11  | 1.13  | 1.14  | 1.16  | 1.17  | 1.20  | 1.22  | 1.24  | 1.26  | 1.29  | 1.32  | 1.34  | 1.36  | 1.39  | 1.41  | 1.43  | 1.45  | 1.47  | 1.49  | 1.49  | 1.49  | 1.49  | 1.49  | 1.49  | 1.49  | 1.49  | 1.49  | 1.49  | 1.49 | 1.49 | 1.49 | 1.49 | 1.49 |      |
| 0.794                          |                                                        | -0.1                                                 | 1.02  | 1.02  | 1.03  | 1.03  | 1.04  | 1.04  | 1.05  | 1.06  | 1.07  | 1.08  | 1.09  | 1.10  | 1.12  | 1.14  | 1.15  | 1.17  | 1.19  | 1.21  | 1.23  | 1.26  | 1.28  | 1.31  | 1.33  | 1.36  | 1.39  | 1.41  | 1.43  | 1.45  | 1.47  | 1.49  | 1.49  | 1.49  | 1.49  | 1.49  | 1.49  | 1.49  | 1.49  | 1.49  | 1.49  | 1.49  | 1.49 | 1.49 | 1.49 | 1.49 | 1.49 |      |
| 1.000                          |                                                        | 0                                                    | 1.02  | 1.02  | 1.03  | 1.03  | 1.03  | 1.04  | 1.05  | 1.06  | 1.07  | 1.08  | 1.09  | 1.10  | 1.12  | 1.14  | 1.16  | 1.18  | 1.20  | 1.22  | 1.25  | 1.27  | 1.30  | 1.33  | 1.35  | 1.38  | 1.41  | 1.43  | 1.45  | 1.47  | 1.49  | 1.49  | 1.49  | 1.49  | 1.49  | 1.49  | 1.49  | 1.49  | 1.49  | 1.49  | 1.49  | 1.49  | 1.49 | 1.49 | 1.49 | 1.49 | 1.49 |      |
| 1.259                          |                                                        | 0.1                                                  | 1.02  | 1.03  | 1.03  | 1.03  | 1.04  | 1.04  | 1.05  | 1.06  | 1.07  | 1.08  | 1.09  | 1.10  | 1.12  | 1.14  | 1.16  | 1.18  | 1.20  | 1.22  | 1.25  | 1.27  | 1.30  | 1.32  | 1.35  | 1.38  | 1.40  | 1.42  | 1.44  | 1.46  | 1.48  | 1.49  | 1.49  | 1.49  | 1.49  | 1.49  | 1.49  | 1.49  | 1.49  | 1.49  | 1.49  | 1.49  | 1.49 | 1.49 | 1.49 | 1.49 | 1.49 |      |
| 1.585                          |                                                        | 0.2                                                  | 1.03  | 1.03  | 1.03  | 1.04  | 1.04  | 1.05  | 1.06  | 1.07  | 1.08  | 1.09  | 1.10  | 1.11  | 1.13  | 1.16  | 1.17  | 1.20  | 1.22  | 1.24  | 1.27  | 1.29  | 1.32  | 1.35  | 1.38  | 1.40  | 1.42  | 1.44  | 1.46  | 1.48  | 1.49  | 1.49  | 1.49  | 1.49  | 1.49  | 1.49  | 1.49  | 1.49  | 1.49  | 1.49  | 1.49  | 1.49  | 1.49 | 1.49 | 1.49 | 1.49 | 1.49 | 1.49 |
| 1.995                          |                                                        | 0.3                                                  | 1.03  | 1.03  | 1.04  | 1.04  | 1.04  | 1.05  | 1.06  | 1.07  | 1.08  | 1.09  | 1.10  | 1.11  | 1.13  | 1.14  | 1.15  | 1.17  | 1.19  | 1.21  | 1.24  | 1.27  | 1.29  | 1.32  | 1.35  | 1.37  | 1.40  | 1.42  | 1.44  | 1.46  | 1.48  | 1.49  | 1.49  | 1.49  | 1.49  | 1.49  | 1.49  | 1.49  | 1.49  | 1.49  | 1.49  | 1.49  | 1.49 | 1.49 | 1.49 | 1.49 | 1.49 | 1.49 |
| 2.512                          |                                                        | 0.4                                                  | 1.03  | 1.04  | 1.04  | 1.04  | 1.05  | 1.06  | 1.07  | 1.08  | 1.09  | 1.10  | 1.11  | 1.13  | 1.14  | 1.15  | 1.17  | 1.19  | 1.21  | 1.24  | 1.26  | 1.29  | 1.31  | 1.34  | 1.37  | 1.39  | 1.41  | 1.44  | 1.46  | 1.48  | 1.49  | 1.49  | 1.49  | 1.49  | 1.49  | 1.49  | 1.49  | 1.49  | 1.49  | 1.49  | 1.49  | 1.49  | 1.49 | 1.49 | 1.49 | 1.49 | 1.49 |      |
| 3.162                          |                                                        | 0.5                                                  | 1.03  | 1.04  | 1.04  | 1.05  | 1.05  | 1.06  | 1.07  | 1.08  | 1.09  | 1.10  | 1.11  | 1.12  | 1.14  | 1.15  | 1.17  | 1.19  | 1.21  | 1.23  | 1.26  | 1.28  | 1.31  | 1.34  | 1.37  | 1.39  | 1.41  | 1.43  | 1.46  | 1.48  | 1.49  | 1.49  | 1.49  | 1.49  | 1.49  | 1.49  | 1.49  | 1.49  | 1.49  | 1.49  | 1.49  | 1.49  | 1.49 | 1.49 | 1.49 | 1.49 | 1.49 |      |
| 3.981                          |                                                        | 0.6                                                  | 1.04  | 1.04  | 1.04  | 1.05  | 1.05  | 1.06  | 1.07  | 1.08  | 1.09  | 1.10  | 1.11  | 1.12  | 1.13  | 1.15  | 1.17  | 1.18  | 1.20  | 1.23  | 1.25  | 1.28  | 1.31  | 1.34  | 1.36  | 1.39  | 1.41  | 1.43  | 1.46  | 1.48  | 1.49  | 1.49  | 1.49  | 1.49  | 1.49  | 1.49  | 1.49  | 1.49  | 1.49  | 1.49  | 1.49  | 1.49  | 1.49 | 1.49 | 1.49 | 1.49 | 1.49 |      |
| 5.012                          |                                                        | 0.7                                                  | 1.04  | 1.04  | 1.04  | 1.05  | 1.05  | 1.06  | 1.07  | 1.08  | 1.09  | 1.10  | 1.11  | 1.12  | 1.13  | 1.14  | 1.16  | 1.18  | 1.20  | 1.23  | 1.25  | 1.28  | 1.30  | 1.33  | 1.36  | 1.39  | 1.41  | 1.43  | 1.45  | 1.48  | 1.49  | 1.49  | 1.49  | 1.49  | 1.49  | 1.49  | 1.49  | 1.49  | 1.49  | 1.49  | 1.49  | 1.49  | 1.49 | 1.49 | 1.49 | 1.49 | 1.49 |      |
| 6.310                          |                                                        | 0.8                                                  | 1.04  | 1.04  | 1.04  | 1.05  | 1.05  | 1.06  | 1.07  | 1.08  | 1.09  | 1.10  | 1.11  | 1.12  | 1.13  | 1.14  | 1.16  | 1.18  | 1.20  | 1.23  | 1.25  | 1.28  | 1.30  | 1.33  | 1.36  | 1.39  | 1.41  | 1.43  | 1.45  | 1.48  | 1.49  | 1.49  | 1.49  | 1.49  | 1.49  | 1.49  | 1.49  | 1.49  | 1.49  | 1.49  | 1.49  | 1.49  | 1.49 | 1.49 | 1.49 | 1.49 | 1.49 |      |
| 7.943                          |                                                        | 0.9                                                  | 1.04  | 1.04  | 1.04  | 1.05  | 1.05  | 1.06  | 1.07  | 1.08  | 1.09  | 1.10  | 1.11  | 1.12  | 1.13  | 1.14  | 1.16  | 1.18  | 1.20  | 1.23  | 1.25  | 1.28  | 1.30  |       |       |       |       |       |       |       |       |       |       |       |       |       |       |       |       |       |       |       |      |      |      |      |      |      |



|                                                        |       | Shell Thickness ratio, $h/R$                         |       |       |       |       |       |       |       |       |       |       |       |       |       |       |       |       |       |       |       |       |       |       |       |       |       |       |       |       |       |       |       |       |       |       |       |       |       |       |       |       |      |      |      |      |      |      |      |
|--------------------------------------------------------|-------|------------------------------------------------------|-------|-------|-------|-------|-------|-------|-------|-------|-------|-------|-------|-------|-------|-------|-------|-------|-------|-------|-------|-------|-------|-------|-------|-------|-------|-------|-------|-------|-------|-------|-------|-------|-------|-------|-------|-------|-------|-------|-------|-------|------|------|------|------|------|------|------|
|                                                        |       | 0.010                                                | 0.011 | 0.013 | 0.014 | 0.016 | 0.018 | 0.020 | 0.022 | 0.025 | 0.028 | 0.032 | 0.035 | 0.040 | 0.045 | 0.050 | 0.056 | 0.063 | 0.071 | 0.079 | 0.089 | 0.100 | 0.112 | 0.126 | 0.141 | 0.158 | 0.178 | 0.200 | 0.224 | 0.251 | 0.282 | 0.316 | 0.355 | 0.398 | 0.447 | 0.501 | 0.562 | 0.631 | 0.708 | 0.794 | 0.891 | 1.000 |      |      |      |      |      |      |      |
| Indenter radius ratio, $R_p/R$                         |       | Logarithm of shell thickness ratio, $\log_{10}(h/R)$ |       |       |       |       |       |       |       |       |       |       |       |       |       |       |       |       |       |       |       |       |       |       |       |       |       |       |       |       |       |       |       |       |       |       |       |       |       |       |       |       |      |      |      |      |      |      |      |
|                                                        |       | -2.00                                                | -1.95 | -1.90 | -1.85 | -1.80 | -1.75 | -1.70 | -1.65 | -1.60 | -1.55 | -1.50 | -1.45 | -1.40 | -1.35 | -1.30 | -1.25 | -1.20 | -1.15 | -1.10 | -1.05 | -1.00 | -0.95 | -0.90 | -0.85 | -0.80 | -0.75 | -0.70 | -0.65 | -0.60 | -0.55 | -0.50 | -0.45 | -0.40 | -0.35 | -0.30 | -0.25 | -0.20 | -0.15 | -0.10 | -0.05 | 0.00  |      |      |      |      |      |      |      |
| Logarithm of indenter radius ratio, $\log_{10}(R_p/R)$ | 0.020 | -1.7                                                 | 1.03  | 1.04  | 1.04  | 1.05  | 1.05  | 1.06  | 1.06  | 1.08  | 1.09  | 1.10  | 1.11  | 1.13  | 1.14  | 1.15  | 1.17  | 1.18  | 1.19  | 1.22  | 1.24  | 1.26  | 1.28  | 1.30  | 1.32  | 1.34  | 1.36  | 1.39  | 1.41  | 1.43  | 1.45  | 1.46  | 1.48  | 1.48  | 1.49  | 1.49  | 1.50  | 1.50  | 1.50  | 1.50  | 1.50  | 1.50  | 1.50 | 1.50 | 1.50 | 1.50 |      |      |      |
|                                                        | 0.025 | -1.6                                                 | 1.03  | 1.04  | 1.04  | 1.05  | 1.05  | 1.06  | 1.06  | 1.07  | 1.09  | 1.10  | 1.11  | 1.12  | 1.14  | 1.15  | 1.16  | 1.17  | 1.19  | 1.21  | 1.23  | 1.25  | 1.27  | 1.29  | 1.31  | 1.33  | 1.36  | 1.38  | 1.40  | 1.42  | 1.44  | 1.46  | 1.47  | 1.48  | 1.48  | 1.49  | 1.49  | 1.50  | 1.50  | 1.50  | 1.50  | 1.50  | 1.50 | 1.50 | 1.50 | 1.50 | 1.50 |      |      |
|                                                        | 0.032 | -1.5                                                 | 1.03  | 1.03  | 1.04  | 1.04  | 1.05  | 1.05  | 1.06  | 1.07  | 1.08  | 1.10  | 1.11  | 1.12  | 1.13  | 1.15  | 1.16  | 1.17  | 1.18  | 1.20  | 1.22  | 1.24  | 1.26  | 1.28  | 1.30  | 1.33  | 1.35  | 1.37  | 1.40  | 1.42  | 1.44  | 1.45  | 1.47  | 1.47  | 1.48  | 1.48  | 1.50  | 1.50  | 1.50  | 1.50  | 1.50  | 1.50  | 1.50 | 1.50 | 1.50 | 1.50 | 1.50 |      |      |
|                                                        | 0.040 | -1.4                                                 | 1.03  | 1.03  | 1.04  | 1.04  | 1.05  | 1.05  | 1.07  | 1.08  | 1.09  | 1.11  | 1.12  | 1.13  | 1.14  | 1.15  | 1.16  | 1.17  | 1.19  | 1.21  | 1.23  | 1.25  | 1.27  | 1.29  | 1.32  | 1.34  | 1.37  | 1.39  | 1.41  | 1.43  | 1.45  | 1.46  | 1.47  | 1.48  | 1.48  | 1.50  | 1.50  | 1.50  | 1.50  | 1.50  | 1.50  | 1.50  | 1.50 | 1.50 | 1.50 | 1.50 | 1.50 |      |      |
|                                                        | 0.050 | -1.3                                                 | 1.03  | 1.03  | 1.04  | 1.04  | 1.05  | 1.05  | 1.06  | 1.08  | 1.09  | 1.11  | 1.12  | 1.13  | 1.14  | 1.15  | 1.16  | 1.19  | 1.21  | 1.23  | 1.25  | 1.26  | 1.28  | 1.31  | 1.34  | 1.36  | 1.39  | 1.41  | 1.43  | 1.45  | 1.46  | 1.47  | 1.48  | 1.50  | 1.50  | 1.50  | 1.50  | 1.50  | 1.50  | 1.50  | 1.50  | 1.50  | 1.50 | 1.50 | 1.50 | 1.50 | 1.50 |      |      |
|                                                        | 0.063 | -1.2                                                 | 1.02  | 1.03  | 1.03  | 1.04  | 1.04  | 1.05  | 1.06  | 1.07  | 1.09  | 1.10  | 1.11  | 1.12  | 1.13  | 1.14  | 1.16  | 1.18  | 1.20  | 1.22  | 1.24  | 1.26  | 1.28  | 1.31  | 1.33  | 1.36  | 1.38  | 1.40  | 1.42  | 1.44  | 1.45  | 1.46  | 1.47  | 1.48  | 1.50  | 1.50  | 1.50  | 1.50  | 1.50  | 1.50  | 1.50  | 1.50  | 1.50 | 1.50 | 1.50 | 1.50 | 1.50 |      |      |
|                                                        | 0.079 | -1.1                                                 | 1.02  | 1.03  | 1.03  | 1.03  | 1.04  | 1.04  | 1.06  | 1.07  | 1.08  | 1.09  | 1.10  | 1.11  | 1.12  | 1.13  | 1.15  | 1.17  | 1.19  | 1.21  | 1.23  | 1.25  | 1.28  | 1.30  | 1.32  | 1.35  | 1.37  | 1.39  | 1.42  | 1.44  | 1.45  | 1.46  | 1.47  | 1.48  | 1.49  | 1.50  | 1.50  | 1.50  | 1.50  | 1.50  | 1.50  | 1.50  | 1.50 | 1.50 | 1.50 | 1.50 | 1.50 |      |      |
|                                                        | 0.100 | -1                                                   | 1.02  | 1.02  | 1.03  | 1.03  | 1.04  | 1.04  | 1.05  | 1.06  | 1.07  | 1.08  | 1.09  | 1.10  | 1.11  | 1.12  | 1.14  | 1.16  | 1.18  | 1.20  | 1.22  | 1.24  | 1.27  | 1.29  | 1.32  | 1.34  | 1.37  | 1.39  | 1.41  | 1.43  | 1.45  | 1.46  | 1.47  | 1.48  | 1.49  | 1.50  | 1.50  | 1.50  | 1.50  | 1.50  | 1.50  | 1.50  | 1.50 | 1.50 | 1.50 | 1.50 | 1.50 |      |      |
|                                                        | 0.158 | -0.9                                                 | 1.02  | 1.02  | 1.03  | 1.03  | 1.03  | 1.04  | 1.04  | 1.05  | 1.06  | 1.07  | 1.08  | 1.09  | 1.10  | 1.11  | 1.12  | 1.14  | 1.16  | 1.18  | 1.20  | 1.22  | 1.24  | 1.27  | 1.29  | 1.32  | 1.34  | 1.37  | 1.39  | 1.41  | 1.43  | 1.45  | 1.46  | 1.47  | 1.48  | 1.49  | 1.50  | 1.50  | 1.50  | 1.50  | 1.50  | 1.50  | 1.50 | 1.50 | 1.50 | 1.50 | 1.50 | 1.50 |      |
|                                                        | 0.200 | -0.8                                                 | 1.02  | 1.02  | 1.03  | 1.03  | 1.03  | 1.04  | 1.04  | 1.05  | 1.06  | 1.07  | 1.08  | 1.09  | 1.10  | 1.11  | 1.12  | 1.13  | 1.15  | 1.17  | 1.19  | 1.21  | 1.23  | 1.26  | 1.28  | 1.30  | 1.33  | 1.35  | 1.37  | 1.40  | 1.42  | 1.44  | 1.45  | 1.46  | 1.47  | 1.48  | 1.49  | 1.49  | 1.49  | 1.49  | 1.49  | 1.50  | 1.50 | 1.50 | 1.50 | 1.50 | 1.50 | 1.50 |      |
|                                                        | 0.251 | -0.7                                                 | 1.02  | 1.02  | 1.03  | 1.03  | 1.03  | 1.04  | 1.04  | 1.05  | 1.06  | 1.07  | 1.08  | 1.09  | 1.10  | 1.11  | 1.12  | 1.13  | 1.15  | 1.17  | 1.19  | 1.20  | 1.23  | 1.25  | 1.27  | 1.30  | 1.32  | 1.35  | 1.37  | 1.40  | 1.42  | 1.44  | 1.45  | 1.46  | 1.47  | 1.48  | 1.49  | 1.49  | 1.49  | 1.49  | 1.49  | 1.49  | 1.49 | 1.49 | 1.49 | 1.49 | 1.49 | 1.49 |      |
|                                                        | 0.316 | -0.6                                                 | 1.02  | 1.02  | 1.03  | 1.03  | 1.03  | 1.04  | 1.04  | 1.05  | 1.06  | 1.07  | 1.08  | 1.09  | 1.10  | 1.11  | 1.12  | 1.13  | 1.14  | 1.16  | 1.18  | 1.19  | 1.22  | 1.24  | 1.26  | 1.29  | 1.31  | 1.34  | 1.36  | 1.38  | 1.41  | 1.43  | 1.44  | 1.45  | 1.47  | 1.48  | 1.49  | 1.49  | 1.49  | 1.49  | 1.49  | 1.49  | 1.49 | 1.49 | 1.49 | 1.49 | 1.49 | 1.49 |      |
|                                                        | 0.398 | -0.5                                                 | 1.02  | 1.02  | 1.03  | 1.03  | 1.03  | 1.04  | 1.04  | 1.05  | 1.06  | 1.07  | 1.08  | 1.09  | 1.10  | 1.11  | 1.12  | 1.14  | 1.16  | 1.17  | 1.19  | 1.21  | 1.24  | 1.26  | 1.28  | 1.31  | 1.33  | 1.35  | 1.38  | 1.40  | 1.42  | 1.43  | 1.45  | 1.47  | 1.49  | 1.49  | 1.49  | 1.49  | 1.49  | 1.49  | 1.49  | 1.49  | 1.49 | 1.49 | 1.49 | 1.49 | 1.49 | 1.49 |      |
|                                                        | 0.501 | -0.4                                                 | 1.02  | 1.02  | 1.03  | 1.03  | 1.03  | 1.04  | 1.04  | 1.05  | 1.06  | 1.07  | 1.08  | 1.09  | 1.10  | 1.11  | 1.12  | 1.14  | 1.15  | 1.17  | 1.18  | 1.21  | 1.23  | 1.25  | 1.27  | 1.30  | 1.33  | 1.35  | 1.37  | 1.40  | 1.42  | 1.43  | 1.45  | 1.47  | 1.49  | 1.49  | 1.49  | 1.49  | 1.49  | 1.49  | 1.49  | 1.49  | 1.49 | 1.49 | 1.49 | 1.49 | 1.49 | 1.49 |      |
|                                                        | 0.631 | -0.3                                                 | 1.02  | 1.02  | 1.03  | 1.03  | 1.03  | 1.03  | 1.04  | 1.04  | 1.05  | 1.06  | 1.07  | 1.08  | 1.09  | 1.10  | 1.11  | 1.13  | 1.14  | 1.15  | 1.17  | 1.19  | 1.21  | 1.23  | 1.26  | 1.29  | 1.31  | 1.33  | 1.36  | 1.39  | 1.41  | 1.43  | 1.45  | 1.47  | 1.49  | 1.49  | 1.49  | 1.49  | 1.49  | 1.49  | 1.49  | 1.49  | 1.49 | 1.49 | 1.49 | 1.49 | 1.49 | 1.49 |      |
|                                                        | 0.794 | -0.2                                                 | 1.02  | 1.02  | 1.03  | 1.03  | 1.03  | 1.03  | 1.04  | 1.04  | 1.05  | 1.06  | 1.07  | 1.08  | 1.09  | 1.10  | 1.11  | 1.12  | 1.13  | 1.15  | 1.16  | 1.18  | 1.21  | 1.23  | 1.25  | 1.28  | 1.30  | 1.33  | 1.36  | 1.38  | 1.40  | 1.42  | 1.44  | 1.46  | 1.48  | 1.49  | 1.49  | 1.49  | 1.49  | 1.49  | 1.49  | 1.49  | 1.49 | 1.49 | 1.49 | 1.49 | 1.49 | 1.49 |      |
|                                                        | 1.000 | 0                                                    | 1.02  | 1.02  | 1.03  | 1.03  | 1.03  | 1.03  | 1.04  | 1.04  | 1.05  | 1.06  | 1.07  | 1.08  | 1.09  | 1.10  | 1.11  | 1.13  | 1.14  | 1.16  | 1.18  | 1.20  | 1.22  | 1.25  | 1.27  | 1.30  | 1.32  | 1.35  | 1.38  | 1.40  | 1.42  | 1.44  | 1.46  | 1.48  | 1.49  | 1.49  | 1.49  | 1.49  | 1.49  | 1.49  | 1.49  | 1.49  | 1.49 | 1.49 | 1.49 | 1.49 | 1.49 | 1.49 |      |
|                                                        | 1.259 | 0.1                                                  | 1.02  | 1.03  | 1.03  | 1.03  | 1.03  | 1.04  | 1.04  | 1.05  | 1.06  | 1.07  | 1.08  | 1.09  | 1.10  | 1.11  | 1.13  | 1.14  | 1.15  | 1.17  | 1.20  | 1.22  | 1.24  | 1.27  | 1.29  | 1.32  | 1.35  | 1.38  | 1.40  | 1.42  | 1.44  | 1.46  | 1.48  | 1.49  | 1.49  | 1.49  | 1.49  | 1.49  | 1.49  | 1.49  | 1.49  | 1.49  | 1.49 | 1.49 | 1.49 | 1.49 | 1.49 | 1.49 |      |
|                                                        | 1.585 | 0.2                                                  | 1.03  | 1.03  | 1.03  | 1.03  | 1.04  | 1.04  | 1.05  | 1.06  | 1.07  | 1.08  | 1.09  | 1.10  | 1.11  | 1.13  | 1.14  | 1.15  | 1.17  | 1.19  | 1.21  | 1.24  | 1.27  | 1.29  | 1.32  | 1.35  | 1.37  | 1.40  | 1.42  | 1.44  | 1.46  | 1.48  | 1.49  | 1.49  | 1.49  | 1.49  | 1.49  | 1.49  | 1.49  | 1.49  | 1.49  | 1.49  | 1.49 | 1.49 | 1.49 | 1.49 | 1.49 | 1.49 | 1.49 |
|                                                        | 1.995 | 0.3                                                  | 1.03  | 1.03  | 1.03  | 1.04  | 1.04  | 1.04  | 1.05  | 1.06  | 1.07  | 1.08  | 1.09  | 1.10  | 1.11  | 1.13  | 1.14  | 1.15  | 1.17  | 1.19  | 1.21  | 1.24  | 1.26  | 1.29  | 1.31  | 1.34  | 1.37  | 1.39  | 1.41  | 1.43  | 1.46  | 1.48  | 1.49  | 1.49  | 1.49  | 1.49  | 1.49  | 1.49  | 1.49  | 1.49  | 1.49  | 1.49  | 1.49 | 1.49 | 1.49 | 1.49 | 1.49 | 1.49 | 1.49 |
| 2.512                                                  | 0.4   | 1.03                                                 | 1.03  | 1.03  | 1.04  | 1.04  | 1.04  | 1.05  | 1.06  | 1.07  | 1.08  | 1.09  | 1.10  | 1.11  | 1.12  | 1.14  | 1.15  | 1.17  | 1.19  | 1.21  | 1.23  | 1.26  | 1.28  | 1.31  | 1.34  | 1.37  | 1.39  | 1.41  | 1.43  | 1.46  | 1.48  | 1.49  | 1.49  | 1.49  | 1.49  | 1.49  | 1.49  | 1.49  | 1.49  | 1.49  | 1.49  | 1.49  | 1.49 | 1.49 | 1.49 | 1.49 | 1.49 | 1.49 |      |
| 3.162                                                  | 0.5   | 1.03                                                 | 1.03  | 1.04  | 1.04  | 1.04  | 1.04  | 1.05  | 1.06  | 1.07  | 1.08  | 1.09  | 1.10  | 1.11  | 1.12  | 1.13  | 1.15  | 1.16  | 1.18  | 1.20  | 1.23  | 1.25  | 1.28  | 1.31  | 1.34  | 1.36  | 1.39  | 1.41  | 1.43  | 1.46  | 1.48  | 1.49  | 1.49  | 1.49  | 1.49  | 1.49  | 1.49  | 1.49  | 1.49  | 1.49  | 1.49  | 1.49  | 1.49 | 1.49 | 1.49 | 1.49 | 1.49 | 1.49 |      |
| 3.981                                                  | 0.6   | 1.03                                                 | 1.04  | 1.04  | 1.04  | 1.05  | 1.05  | 1.06  | 1.07  | 1.08  | 1.09  | 1.10  | 1.11  | 1.12  | 1.13  | 1.14  | 1.16  | 1.18  | 1.20  | 1.23  | 1.25  | 1.28  | 1.30  | 1.33  | 1.36  | 1.38  | 1.41  | 1.43  | 1.45  | 1.48  | 1.49  | 1.49  | 1.49  | 1.49  | 1.49  | 1.49  | 1.49  | 1.49  | 1.49  | 1.49  | 1.49. |       |      |      |      |      |      |      |      |

|                                |                                                        | Shell Thickness ratio, $h/R$ |       |       |       |       |       |       |       |       |       |       |       |       |       |       |                                                      |       |       |       |       |       |       |       |       |       |       |       |       |       |       |       |       |       |       |       |       |       |       |       |       |       |       |       |       |       |       |      |      |      |      |      |      |      |      |      |      |      |      |      |      |      |      |      |      |      |      |      |      |      |      |      |      |      |      |      |      |      |      |      |      |      |      |      |      |      |      |      |      |      |      |      |      |      |      |      |      |      |      |      |      |      |      |      |      |      |      |      |      |      |      |      |      |      |      |      |      |      |      |      |      |      |      |      |      |      |      |      |      |      |      |      |      |      |      |      |      |      |      |      |      |      |      |      |      |      |      |      |      |      |      |      |      |      |      |      |      |      |      |      |      |      |      |      |      |      |      |      |      |      |      |      |      |      |      |      |      |      |      |      |      |      |      |      |      |      |      |      |      |      |      |      |      |      |      |      |      |      |      |      |      |      |      |      |      |      |      |      |      |      |      |      |      |      |      |      |      |      |      |      |      |      |      |      |      |      |      |      |      |      |      |      |      |      |      |      |      |      |      |      |      |      |      |      |      |      |      |      |      |      |      |      |      |      |      |      |      |      |      |      |      |      |      |      |      |      |      |      |      |      |      |      |      |      |      |      |      |      |      |      |      |      |      |      |      |      |      |      |      |      |      |      |      |      |      |      |      |      |      |      |      |      |      |      |      |      |      |      |      |      |      |      |      |      |      |      |      |      |      |      |      |      |      |      |      |      |      |      |      |      |      |      |      |      |      |      |      |      |      |      |      |      |      |      |      |      |      |      |      |      |      |      |      |      |      |      |      |      |      |      |      |      |      |      |      |      |      |      |      |      |      |      |      |      |      |      |      |      |      |      |      |      |      |      |      |      |      |      |      |      |      |      |      |      |      |      |      |      |      |      |      |      |      |      |      |      |      |      |      |      |      |      |      |      |      |      |      |      |      |      |      |      |      |      |      |      |      |      |      |      |      |      |      |      |      |      |      |      |      |      |      |      |      |      |      |      |      |      |      |      |      |      |      |      |      |      |      |      |      |      |      |      |      |      |      |      |      |      |      |      |      |      |      |      |      |      |      |      |      |      |      |      |      |      |      |      |      |      |      |      |      |      |      |      |      |      |      |      |      |      |      |      |      |      |      |      |      |      |      |      |      |      |      |      |      |      |      |      |      |      |      |      |      |      |      |      |      |      |      |      |      |      |      |      |      |      |      |      |      |      |      |  |
|--------------------------------|--------------------------------------------------------|------------------------------|-------|-------|-------|-------|-------|-------|-------|-------|-------|-------|-------|-------|-------|-------|------------------------------------------------------|-------|-------|-------|-------|-------|-------|-------|-------|-------|-------|-------|-------|-------|-------|-------|-------|-------|-------|-------|-------|-------|-------|-------|-------|-------|-------|-------|-------|-------|-------|------|------|------|------|------|------|------|------|------|------|------|------|------|------|------|------|------|------|------|------|------|------|------|------|------|------|------|------|------|------|------|------|------|------|------|------|------|------|------|------|------|------|------|------|------|------|------|------|------|------|------|------|------|------|------|------|------|------|------|------|------|------|------|------|------|------|------|------|------|------|------|------|------|------|------|------|------|------|------|------|------|------|------|------|------|------|------|------|------|------|------|------|------|------|------|------|------|------|------|------|------|------|------|------|------|------|------|------|------|------|------|------|------|------|------|------|------|------|------|------|------|------|------|------|------|------|------|------|------|------|------|------|------|------|------|------|------|------|------|------|------|------|------|------|------|------|------|------|------|------|------|------|------|------|------|------|------|------|------|------|------|------|------|------|------|------|------|------|------|------|------|------|------|------|------|------|------|------|------|------|------|------|------|------|------|------|------|------|------|------|------|------|------|------|------|------|------|------|------|------|------|------|------|------|------|------|------|------|------|------|------|------|------|------|------|------|------|------|------|------|------|------|------|------|------|------|------|------|------|------|------|------|------|------|------|------|------|------|------|------|------|------|------|------|------|------|------|------|------|------|------|------|------|------|------|------|------|------|------|------|------|------|------|------|------|------|------|------|------|------|------|------|------|------|------|------|------|------|------|------|------|------|------|------|------|------|------|------|------|------|------|------|------|------|------|------|------|------|------|------|------|------|------|------|------|------|------|------|------|------|------|------|------|------|------|------|------|------|------|------|------|------|------|------|------|------|------|------|------|------|------|------|------|------|------|------|------|------|------|------|------|------|------|------|------|------|------|------|------|------|------|------|------|------|------|------|------|------|------|------|------|------|------|------|------|------|------|------|------|------|------|------|------|------|------|------|------|------|------|------|------|------|------|------|------|------|------|------|------|------|------|------|------|------|------|------|------|------|------|------|------|------|------|------|------|------|------|------|------|------|------|------|------|------|------|------|------|------|------|------|------|------|------|------|------|------|------|------|------|------|------|------|------|------|------|------|------|------|------|------|------|------|------|------|------|------|------|------|------|------|------|------|------|------|------|------|------|------|------|------|------|------|------|------|------|------|------|------|------|------|------|------|------|------|------|------|------|------|------|------|------|------|------|------|------|------|------|------|------|------|------|------|------|------|--|
|                                |                                                        | 0.010                        | 0.011 | 0.013 | 0.014 | 0.016 | 0.018 | 0.020 | 0.022 | 0.025 | 0.028 | 0.032 | 0.035 | 0.040 | 0.045 | 0.050 | Logarithm of shell thickness ratio, $\log_{10}(h/R)$ |       |       |       |       | 0.056 | 0.063 | 0.071 | 0.079 | 0.089 | 0.100 | 0.112 | 0.126 | 0.141 | 0.158 | 0.178 | 0.200 | 0.224 | 0.251 | 0.282 | 0.316 | 0.355 | 0.398 | 0.447 | 0.501 | 0.562 | 0.631 | 0.708 | 0.794 | 0.891 | 1.000 |      |      |      |      |      |      |      |      |      |      |      |      |      |      |      |      |      |      |      |      |      |      |      |      |      |      |      |      |      |      |      |      |      |      |      |      |      |      |      |      |      |      |      |      |      |      |      |      |      |      |      |      |      |      |      |      |      |      |      |      |      |      |      |      |      |      |      |      |      |      |      |      |      |      |      |      |      |      |      |      |      |      |      |      |      |      |      |      |      |      |      |      |      |      |      |      |      |      |      |      |      |      |      |      |      |      |      |      |      |      |      |      |      |      |      |      |      |      |      |      |      |      |      |      |      |      |      |      |      |      |      |      |      |      |      |      |      |      |      |      |      |      |      |      |      |      |      |      |      |      |      |      |      |      |      |      |      |      |      |      |      |      |      |      |      |      |      |      |      |      |      |      |      |      |      |      |      |      |      |      |      |      |      |      |      |      |      |      |      |      |      |      |      |      |      |      |      |      |      |      |      |      |      |      |      |      |      |      |      |      |      |      |      |      |      |      |      |      |      |      |      |      |      |      |      |      |      |      |      |      |      |      |      |      |      |      |      |      |      |      |      |      |      |      |      |      |      |      |      |      |      |      |      |      |      |      |      |      |      |      |      |      |      |      |      |      |      |      |      |      |      |      |      |      |      |      |      |      |      |      |      |      |      |      |      |      |      |      |      |      |      |      |      |      |      |      |      |      |      |      |      |      |      |      |      |      |      |      |      |      |      |      |      |      |      |      |      |      |      |      |      |      |      |      |      |      |      |      |      |      |      |      |      |      |      |      |      |      |      |      |      |      |      |      |      |      |      |      |      |      |      |      |      |      |      |      |      |      |      |      |      |      |      |      |      |      |      |      |      |      |      |      |      |      |      |      |      |      |      |      |      |      |      |      |      |      |      |      |      |      |      |      |      |      |      |      |      |      |      |      |      |      |      |      |      |      |      |      |      |      |      |      |      |      |      |      |      |      |      |      |      |      |      |      |      |      |      |      |      |      |      |      |      |      |      |      |      |      |      |      |      |      |      |      |      |      |      |      |      |      |      |      |      |      |      |      |      |      |      |      |      |      |      |      |      |      |      |      |      |      |      |      |      |      |      |      |      |      |      |      |      |      |      |      |      |      |      |      |      |      |      |      |      |      |  |
| Indenter radius ratio, $R_p/R$ | Logarithm of indenter radius ratio, $\log_{10}(R_p/R)$ | -2.00                        | -1.95 | -1.90 | -1.85 | -1.80 | -1.75 | -1.70 | -1.65 | -1.60 | -1.55 | -1.50 | -1.45 | -1.40 | -1.35 | -1.30 | -1.25                                                | -1.20 | -1.15 | -1.10 | -1.05 | -1.00 | -0.95 | -0.90 | -0.85 | -0.80 | -0.75 | -0.70 | -0.65 | -0.60 | -0.55 | -0.50 | -0.45 | -0.40 | -0.35 | -0.30 | -0.25 | -0.20 | -0.15 | -0.10 | -0.05 | 0.00  |       |       |       |       |       |      |      |      |      |      |      |      |      |      |      |      |      |      |      |      |      |      |      |      |      |      |      |      |      |      |      |      |      |      |      |      |      |      |      |      |      |      |      |      |      |      |      |      |      |      |      |      |      |      |      |      |      |      |      |      |      |      |      |      |      |      |      |      |      |      |      |      |      |      |      |      |      |      |      |      |      |      |      |      |      |      |      |      |      |      |      |      |      |      |      |      |      |      |      |      |      |      |      |      |      |      |      |      |      |      |      |      |      |      |      |      |      |      |      |      |      |      |      |      |      |      |      |      |      |      |      |      |      |      |      |      |      |      |      |      |      |      |      |      |      |      |      |      |      |      |      |      |      |      |      |      |      |      |      |      |      |      |      |      |      |      |      |      |      |      |      |      |      |      |      |      |      |      |      |      |      |      |      |      |      |      |      |      |      |      |      |      |      |      |      |      |      |      |      |      |      |      |      |      |      |      |      |      |      |      |      |      |      |      |      |      |      |      |      |      |      |      |      |      |      |      |      |      |      |      |      |      |      |      |      |      |      |      |      |      |      |      |      |      |      |      |      |      |      |      |      |      |      |      |      |      |      |      |      |      |      |      |      |      |      |      |      |      |      |      |      |      |      |      |      |      |      |      |      |      |      |      |      |      |      |      |      |      |      |      |      |      |      |      |      |      |      |      |      |      |      |      |      |      |      |      |      |      |      |      |      |      |      |      |      |      |      |      |      |      |      |      |      |      |      |      |      |      |      |      |      |      |      |      |      |      |      |      |      |      |      |      |      |      |      |      |      |      |      |      |      |      |      |      |      |      |      |      |      |      |      |      |      |      |      |      |      |      |      |      |      |      |      |      |      |      |      |      |      |      |      |      |      |      |      |      |      |      |      |      |      |      |      |      |      |      |      |      |      |      |      |      |      |      |      |      |      |      |      |      |      |      |      |      |      |      |      |      |      |      |      |      |      |      |      |      |      |      |      |      |      |      |      |      |      |      |      |      |      |      |      |      |      |      |      |      |      |      |      |      |      |      |      |      |      |      |      |      |      |      |      |      |      |      |      |      |      |      |      |      |      |      |      |      |      |      |      |      |      |      |      |      |      |      |      |      |      |      |      |      |      |      |      |      |      |      |      |      |      |  |
|                                |                                                        | -1.7                         | 1.03  | 1.04  | 1.05  | 1.05  | 1.06  | 1.06  | 1.07  | 1.09  | 1.10  | 1.11  | 1.12  | 1.14  | 1.15  | 1.16  | 1.17                                                 | 1.19  | 1.21  | 1.23  | 1.25  | 1.27  | 1.29  | 1.30  | 1.32  | 1.34  | 1.37  | 1.39  | 1.41  | 1.43  | 1.45  | 1.46  | 1.47  | 1.47  | 1.48  | 1.48  | 1.49  | 1.49  | 1.49  | 1.49  | 1.49  | 1.49  | 1.49  | 1.49  | 1.49  | 1.49  | 1.49  | 1.49 | 1.49 |      |      |      |      |      |      |      |      |      |      |      |      |      |      |      |      |      |      |      |      |      |      |      |      |      |      |      |      |      |      |      |      |      |      |      |      |      |      |      |      |      |      |      |      |      |      |      |      |      |      |      |      |      |      |      |      |      |      |      |      |      |      |      |      |      |      |      |      |      |      |      |      |      |      |      |      |      |      |      |      |      |      |      |      |      |      |      |      |      |      |      |      |      |      |      |      |      |      |      |      |      |      |      |      |      |      |      |      |      |      |      |      |      |      |      |      |      |      |      |      |      |      |      |      |      |      |      |      |      |      |      |      |      |      |      |      |      |      |      |      |      |      |      |      |      |      |      |      |      |      |      |      |      |      |      |      |      |      |      |      |      |      |      |      |      |      |      |      |      |      |      |      |      |      |      |      |      |      |      |      |      |      |      |      |      |      |      |      |      |      |      |      |      |      |      |      |      |      |      |      |      |      |      |      |      |      |      |      |      |      |      |      |      |      |      |      |      |      |      |      |      |      |      |      |      |      |      |      |      |      |      |      |      |      |      |      |      |      |      |      |      |      |      |      |      |      |      |      |      |      |      |      |      |      |      |      |      |      |      |      |      |      |      |      |      |      |      |      |      |      |      |      |      |      |      |      |      |      |      |      |      |      |      |      |      |      |      |      |      |      |      |      |      |      |      |      |      |      |      |      |      |      |      |      |      |      |      |      |      |      |      |      |      |      |      |      |      |      |      |      |      |      |      |      |      |      |      |      |      |      |      |      |      |      |      |      |      |      |      |      |      |      |      |      |      |      |      |      |      |      |      |      |      |      |      |      |      |      |      |      |      |      |      |      |      |      |      |      |      |      |      |      |      |      |      |      |      |      |      |      |      |      |      |      |      |      |      |      |      |      |      |      |      |      |      |      |      |      |      |      |      |      |      |      |      |      |      |      |      |      |      |      |      |      |      |      |      |      |      |      |      |      |      |      |      |      |      |      |      |      |      |      |      |      |      |      |      |      |      |      |      |      |      |      |      |      |      |      |      |      |      |      |      |      |      |      |      |      |      |      |      |      |      |      |      |      |      |      |      |      |      |      |      |      |      |      |      |      |      |      |      |      |      |      |      |      |      |      |      |      |      |      |  |
| 0.025                          | -1.6                                                   | 1.03                         | 1.03  | 1.04  | 1.04  | 1.05  | 1.05  | 1.06  | 1.07  | 1.08  | 1.10  | 1.11  | 1.12  | 1.13  | 1.15  | 1.16  | 1.17                                                 | 1.18  | 1.20  | 1.22  | 1.24  | 1.26  | 1.28  | 1.30  | 1.32  | 1.34  | 1.36  | 1.39  | 1.41  | 1.43  | 1.44  | 1.46  | 1.46  | 1.47  | 1.48  | 1.48  | 1.49  | 1.49  | 1.49  | 1.49  | 1.49  | 1.49  | 1.49  | 1.49  | 1.49  | 1.49  | 1.49  | 1.49 | 1.49 | 1.49 | 1.49 | 1.49 |      |      |      |      |      |      |      |      |      |      |      |      |      |      |      |      |      |      |      |      |      |      |      |      |      |      |      |      |      |      |      |      |      |      |      |      |      |      |      |      |      |      |      |      |      |      |      |      |      |      |      |      |      |      |      |      |      |      |      |      |      |      |      |      |      |      |      |      |      |      |      |      |      |      |      |      |      |      |      |      |      |      |      |      |      |      |      |      |      |      |      |      |      |      |      |      |      |      |      |      |      |      |      |      |      |      |      |      |      |      |      |      |      |      |      |      |      |      |      |      |      |      |      |      |      |      |      |      |      |      |      |      |      |      |      |      |      |      |      |      |      |      |      |      |      |      |      |      |      |      |      |      |      |      |      |      |      |      |      |      |      |      |      |      |      |      |      |      |      |      |      |      |      |      |      |      |      |      |      |      |      |      |      |      |      |      |      |      |      |      |      |      |      |      |      |      |      |      |      |      |      |      |      |      |      |      |      |      |      |      |      |      |      |      |      |      |      |      |      |      |      |      |      |      |      |      |      |      |      |      |      |      |      |      |      |      |      |      |      |      |      |      |      |      |      |      |      |      |      |      |      |      |      |      |      |      |      |      |      |      |      |      |      |      |      |      |      |      |      |      |      |      |      |      |      |      |      |      |      |      |      |      |      |      |      |      |      |      |      |      |      |      |      |      |      |      |      |      |      |      |      |      |      |      |      |      |      |      |      |      |      |      |      |      |      |      |      |      |      |      |      |      |      |      |      |      |      |      |      |      |      |      |      |      |      |      |      |      |      |      |      |      |      |      |      |      |      |      |      |      |      |      |      |      |      |      |      |      |      |      |      |      |      |      |      |      |      |      |      |      |      |      |      |      |      |      |      |      |      |      |      |      |      |      |      |      |      |      |      |      |      |      |      |      |      |      |      |      |      |      |      |      |      |      |      |      |      |      |      |      |      |      |      |      |      |      |      |      |      |      |      |      |      |      |      |      |      |      |      |      |      |      |      |      |      |      |      |      |      |      |      |      |      |      |      |      |      |      |      |      |      |      |      |      |      |      |      |      |      |      |      |      |      |      |      |      |      |      |      |      |      |      |      |      |      |      |      |      |      |      |      |      |      |      |      |      |      |      |      |  |
| 0.032                          | -1.5                                                   | 1.03                         | 1.03  | 1.04  | 1.04  | 1.05  | 1.05  | 1.06  | 1.07  | 1.08  | 1.09  | 1.10  | 1.12  | 1.13  | 1.14  | 1.15  | 1.16                                                 | 1.17  | 1.19  | 1.21  | 1.23  | 1.25  | 1.27  | 1.29  | 1.31  | 1.34  | 1.36  | 1.38  | 1.40  | 1.42  | 1.44  | 1.45  | 1.46  | 1.47  | 1.47  | 1.48  | 1.49  | 1.49  | 1.49  | 1.49  | 1.49  | 1.49  | 1.49  | 1.49  | 1.49  | 1.49  | 1.49  | 1.49 | 1.49 | 1.49 | 1.49 | 1.49 |      |      |      |      |      |      |      |      |      |      |      |      |      |      |      |      |      |      |      |      |      |      |      |      |      |      |      |      |      |      |      |      |      |      |      |      |      |      |      |      |      |      |      |      |      |      |      |      |      |      |      |      |      |      |      |      |      |      |      |      |      |      |      |      |      |      |      |      |      |      |      |      |      |      |      |      |      |      |      |      |      |      |      |      |      |      |      |      |      |      |      |      |      |      |      |      |      |      |      |      |      |      |      |      |      |      |      |      |      |      |      |      |      |      |      |      |      |      |      |      |      |      |      |      |      |      |      |      |      |      |      |      |      |      |      |      |      |      |      |      |      |      |      |      |      |      |      |      |      |      |      |      |      |      |      |      |      |      |      |      |      |      |      |      |      |      |      |      |      |      |      |      |      |      |      |      |      |      |      |      |      |      |      |      |      |      |      |      |      |      |      |      |      |      |      |      |      |      |      |      |      |      |      |      |      |      |      |      |      |      |      |      |      |      |      |      |      |      |      |      |      |      |      |      |      |      |      |      |      |      |      |      |      |      |      |      |      |      |      |      |      |      |      |      |      |      |      |      |      |      |      |      |      |      |      |      |      |      |      |      |      |      |      |      |      |      |      |      |      |      |      |      |      |      |      |      |      |      |      |      |      |      |      |      |      |      |      |      |      |      |      |      |      |      |      |      |      |      |      |      |      |      |      |      |      |      |      |      |      |      |      |      |      |      |      |      |      |      |      |      |      |      |      |      |      |      |      |      |      |      |      |      |      |      |      |      |      |      |      |      |      |      |      |      |      |      |      |      |      |      |      |      |      |      |      |      |      |      |      |      |      |      |      |      |      |      |      |      |      |      |      |      |      |      |      |      |      |      |      |      |      |      |      |      |      |      |      |      |      |      |      |      |      |      |      |      |      |      |      |      |      |      |      |      |      |      |      |      |      |      |      |      |      |      |      |      |      |      |      |      |      |      |      |      |      |      |      |      |      |      |      |      |      |      |      |      |      |      |      |      |      |      |      |      |      |      |      |      |      |      |      |      |      |      |      |      |      |      |      |      |      |      |      |      |      |      |      |      |      |      |      |      |      |      |      |      |      |      |      |      |      |      |      |      |      |      |      |      |      |  |
| 0.040                          | -1.4                                                   | 1.03                         | 1.03  | 1.04  | 1.04  | 1.05  | 1.05  | 1.06  | 1.08  | 1.09  | 1.10  | 1.11  | 1.13  | 1.13  | 1.14  | 1.15  | 1.17                                                 | 1.19  | 1.21  | 1.23  | 1.24  | 1.26  | 1.28  | 1.31  | 1.33  | 1.35  | 1.38  | 1.40  | 1.42  | 1.44  | 1.45  | 1.46  | 1.46  | 1.47  | 1.48  | 1.48  | 1.49  | 1.49  | 1.49  | 1.49  | 1.49  | 1.49  | 1.49  | 1.49  | 1.49  | 1.49  | 1.49  | 1.49 | 1.49 | 1.49 | 1.49 | 1.49 |      |      |      |      |      |      |      |      |      |      |      |      |      |      |      |      |      |      |      |      |      |      |      |      |      |      |      |      |      |      |      |      |      |      |      |      |      |      |      |      |      |      |      |      |      |      |      |      |      |      |      |      |      |      |      |      |      |      |      |      |      |      |      |      |      |      |      |      |      |      |      |      |      |      |      |      |      |      |      |      |      |      |      |      |      |      |      |      |      |      |      |      |      |      |      |      |      |      |      |      |      |      |      |      |      |      |      |      |      |      |      |      |      |      |      |      |      |      |      |      |      |      |      |      |      |      |      |      |      |      |      |      |      |      |      |      |      |      |      |      |      |      |      |      |      |      |      |      |      |      |      |      |      |      |      |      |      |      |      |      |      |      |      |      |      |      |      |      |      |      |      |      |      |      |      |      |      |      |      |      |      |      |      |      |      |      |      |      |      |      |      |      |      |      |      |      |      |      |      |      |      |      |      |      |      |      |      |      |      |      |      |      |      |      |      |      |      |      |      |      |      |      |      |      |      |      |      |      |      |      |      |      |      |      |      |      |      |      |      |      |      |      |      |      |      |      |      |      |      |      |      |      |      |      |      |      |      |      |      |      |      |      |      |      |      |      |      |      |      |      |      |      |      |      |      |      |      |      |      |      |      |      |      |      |      |      |      |      |      |      |      |      |      |      |      |      |      |      |      |      |      |      |      |      |      |      |      |      |      |      |      |      |      |      |      |      |      |      |      |      |      |      |      |      |      |      |      |      |      |      |      |      |      |      |      |      |      |      |      |      |      |      |      |      |      |      |      |      |      |      |      |      |      |      |      |      |      |      |      |      |      |      |      |      |      |      |      |      |      |      |      |      |      |      |      |      |      |      |      |      |      |      |      |      |      |      |      |      |      |      |      |      |      |      |      |      |      |      |      |      |      |      |      |      |      |      |      |      |      |      |      |      |      |      |      |      |      |      |      |      |      |      |      |      |      |      |      |      |      |      |      |      |      |      |      |      |      |      |      |      |      |      |      |      |      |      |      |      |      |      |      |      |      |      |      |      |      |      |      |      |      |      |      |      |      |      |      |      |      |      |      |      |      |      |      |      |      |      |      |      |      |      |      |      |      |      |      |      |      |  |
| 0.050                          | -1.3                                                   | 1.03                         | 1.03  | 1.04  | 1.04  | 1.05  | 1.05  | 1.06  | 1.07  | 1.09  | 1.10  | 1.11  | 1.12  | 1.13  | 1.14  | 1.15  | 1.16                                                 | 1.18  | 1.20  | 1.22  | 1.24  | 1.26  | 1.28  | 1.30  | 1.33  | 1.35  | 1.37  | 1.39  | 1.41  | 1.43  | 1.45  | 1.46  | 1.47  | 1.48  | 1.48  | 1.49  | 1.49  | 1.49  | 1.49  | 1.49  | 1.49  | 1.49  | 1.49  | 1.49  | 1.49  | 1.49  | 1.49  | 1.49 | 1.49 | 1.49 | 1.49 | 1.49 |      |      |      |      |      |      |      |      |      |      |      |      |      |      |      |      |      |      |      |      |      |      |      |      |      |      |      |      |      |      |      |      |      |      |      |      |      |      |      |      |      |      |      |      |      |      |      |      |      |      |      |      |      |      |      |      |      |      |      |      |      |      |      |      |      |      |      |      |      |      |      |      |      |      |      |      |      |      |      |      |      |      |      |      |      |      |      |      |      |      |      |      |      |      |      |      |      |      |      |      |      |      |      |      |      |      |      |      |      |      |      |      |      |      |      |      |      |      |      |      |      |      |      |      |      |      |      |      |      |      |      |      |      |      |      |      |      |      |      |      |      |      |      |      |      |      |      |      |      |      |      |      |      |      |      |      |      |      |      |      |      |      |      |      |      |      |      |      |      |      |      |      |      |      |      |      |      |      |      |      |      |      |      |      |      |      |      |      |      |      |      |      |      |      |      |      |      |      |      |      |      |      |      |      |      |      |      |      |      |      |      |      |      |      |      |      |      |      |      |      |      |      |      |      |      |      |      |      |      |      |      |      |      |      |      |      |      |      |      |      |      |      |      |      |      |      |      |      |      |      |      |      |      |      |      |      |      |      |      |      |      |      |      |      |      |      |      |      |      |      |      |      |      |      |      |      |      |      |      |      |      |      |      |      |      |      |      |      |      |      |      |      |      |      |      |      |      |      |      |      |      |      |      |      |      |      |      |      |      |      |      |      |      |      |      |      |      |      |      |      |      |      |      |      |      |      |      |      |      |      |      |      |      |      |      |      |      |      |      |      |      |      |      |      |      |      |      |      |      |      |      |      |      |      |      |      |      |      |      |      |      |      |      |      |      |      |      |      |      |      |      |      |      |      |      |      |      |      |      |      |      |      |      |      |      |      |      |      |      |      |      |      |      |      |      |      |      |      |      |      |      |      |      |      |      |      |      |      |      |      |      |      |      |      |      |      |      |      |      |      |      |      |      |      |      |      |      |      |      |      |      |      |      |      |      |      |      |      |      |      |      |      |      |      |      |      |      |      |      |      |      |      |      |      |      |      |      |      |      |      |      |      |      |      |      |      |      |      |      |      |      |      |      |      |      |      |      |      |      |      |      |      |      |      |      |      |      |      |      |  |
| 0.063                          | -1.2                                                   | 1.02                         | 1.03  | 1.03  | 1.04  | 1.04  | 1.05  | 1.06  | 1.07  | 1.08  | 1.09  | 1.10  | 1.11  | 1.12  | 1.13  | 1.14  | 1.15                                                 | 1.17  | 1.19  | 1.21  | 1.23  | 1.25  | 1.27  | 1.30  | 1.32  | 1.35  | 1.37  | 1.39  | 1.41  | 1.43  | 1.44  | 1.45  | 1.46  | 1.47  | 1.48  | 1.48  | 1.49  | 1.49  | 1.49  | 1.49  | 1.49  | 1.49  | 1.49  | 1.49  | 1.49  | 1.49  | 1.49  | 1.49 | 1.49 | 1.49 | 1.49 | 1.49 | 1.49 |      |      |      |      |      |      |      |      |      |      |      |      |      |      |      |      |      |      |      |      |      |      |      |      |      |      |      |      |      |      |      |      |      |      |      |      |      |      |      |      |      |      |      |      |      |      |      |      |      |      |      |      |      |      |      |      |      |      |      |      |      |      |      |      |      |      |      |      |      |      |      |      |      |      |      |      |      |      |      |      |      |      |      |      |      |      |      |      |      |      |      |      |      |      |      |      |      |      |      |      |      |      |      |      |      |      |      |      |      |      |      |      |      |      |      |      |      |      |      |      |      |      |      |      |      |      |      |      |      |      |      |      |      |      |      |      |      |      |      |      |      |      |      |      |      |      |      |      |      |      |      |      |      |      |      |      |      |      |      |      |      |      |      |      |      |      |      |      |      |      |      |      |      |      |      |      |      |      |      |      |      |      |      |      |      |      |      |      |      |      |      |      |      |      |      |      |      |      |      |      |      |      |      |      |      |      |      |      |      |      |      |      |      |      |      |      |      |      |      |      |      |      |      |      |      |      |      |      |      |      |      |      |      |      |      |      |      |      |      |      |      |      |      |      |      |      |      |      |      |      |      |      |      |      |      |      |      |      |      |      |      |      |      |      |      |      |      |      |      |      |      |      |      |      |      |      |      |      |      |      |      |      |      |      |      |      |      |      |      |      |      |      |      |      |      |      |      |      |      |      |      |      |      |      |      |      |      |      |      |      |      |      |      |      |      |      |      |      |      |      |      |      |      |      |      |      |      |      |      |      |      |      |      |      |      |      |      |      |      |      |      |      |      |      |      |      |      |      |      |      |      |      |      |      |      |      |      |      |      |      |      |      |      |      |      |      |      |      |      |      |      |      |      |      |      |      |      |      |      |      |      |      |      |      |      |      |      |      |      |      |      |      |      |      |      |      |      |      |      |      |      |      |      |      |      |      |      |      |      |      |      |      |      |      |      |      |      |      |      |      |      |      |      |      |      |      |      |      |      |      |      |      |      |      |      |      |      |      |      |      |      |      |      |      |      |      |      |      |      |      |      |      |      |      |      |      |      |      |      |      |      |      |      |      |      |      |      |      |      |      |      |      |      |      |      |      |      |      |      |      |      |      |      |      |      |      |      |      |  |
| 0.079                          | -1.1                                                   | 1.02                         | 1.03  | 1.03  | 1.03  | 1.04  | 1.04  | 1.05  | 1.06  | 1.07  | 1.08  | 1.09  | 1.10  | 1.11  | 1.12  | 1.13  | 1.14                                                 | 1.16  | 1.18  | 1.20  | 1.22  | 1.24  | 1.27  | 1.29  | 1.32  | 1.34  | 1.36  | 1.38  | 1.40  | 1.43  | 1.44  | 1.45  | 1.46  | 1.47  | 1.48  | 1.48  | 1.49  | 1.49  | 1.49  | 1.49  | 1.49  | 1.49  | 1.49  | 1.49  | 1.49  | 1.49  | 1.49  | 1.49 | 1.49 | 1.49 | 1.49 | 1.49 | 1.49 | 1.49 |      |      |      |      |      |      |      |      |      |      |      |      |      |      |      |      |      |      |      |      |      |      |      |      |      |      |      |      |      |      |      |      |      |      |      |      |      |      |      |      |      |      |      |      |      |      |      |      |      |      |      |      |      |      |      |      |      |      |      |      |      |      |      |      |      |      |      |      |      |      |      |      |      |      |      |      |      |      |      |      |      |      |      |      |      |      |      |      |      |      |      |      |      |      |      |      |      |      |      |      |      |      |      |      |      |      |      |      |      |      |      |      |      |      |      |      |      |      |      |      |      |      |      |      |      |      |      |      |      |      |      |      |      |      |      |      |      |      |      |      |      |      |      |      |      |      |      |      |      |      |      |      |      |      |      |      |      |      |      |      |      |      |      |      |      |      |      |      |      |      |      |      |      |      |      |      |      |      |      |      |      |      |      |      |      |      |      |      |      |      |      |      |      |      |      |      |      |      |      |      |      |      |      |      |      |      |      |      |      |      |      |      |      |      |      |      |      |      |      |      |      |      |      |      |      |      |      |      |      |      |      |      |      |      |      |      |      |      |      |      |      |      |      |      |      |      |      |      |      |      |      |      |      |      |      |      |      |      |      |      |      |      |      |      |      |      |      |      |      |      |      |      |      |      |      |      |      |      |      |      |      |      |      |      |      |      |      |      |      |      |      |      |      |      |      |      |      |      |      |      |      |      |      |      |      |      |      |      |      |      |      |      |      |      |      |      |      |      |      |      |      |      |      |      |      |      |      |      |      |      |      |      |      |      |      |      |      |      |      |      |      |      |      |      |      |      |      |      |      |      |      |      |      |      |      |      |      |      |      |      |      |      |      |      |      |      |      |      |      |      |      |      |      |      |      |      |      |      |      |      |      |      |      |      |      |      |      |      |      |      |      |      |      |      |      |      |      |      |      |      |      |      |      |      |      |      |      |      |      |      |      |      |      |      |      |      |      |      |      |      |      |      |      |      |      |      |      |      |      |      |      |      |      |      |      |      |      |      |      |      |      |      |      |      |      |      |      |      |      |      |      |      |      |      |      |      |      |      |      |      |      |      |      |      |      |      |      |      |      |      |      |      |      |      |      |      |      |      |      |      |      |      |      |      |      |      |      |  |
| 0.100                          | -1                                                     | 1.02                         | 1.02  | 1.03  | 1.03  | 1.03  | 1.04  | 1.04  | 1.05  | 1.06  | 1.07  | 1.08  | 1.09  | 1.10  | 1.11  | 1.12  | 1.14                                                 | 1.16  | 1.18  | 1.20  | 1.21  | 1.24  | 1.26  | 1.29  | 1.31  | 1.34  | 1.36  | 1.38  | 1.40  | 1.42  | 1.44  | 1.45  | 1.46  | 1.47  | 1.48  | 1.48  | 1.49  | 1.49  | 1.49  | 1.49  | 1.49  | 1.49  | 1.49  | 1.49  | 1.49  | 1.49  | 1.49  | 1.49 | 1.49 | 1.49 | 1.49 | 1.49 | 1.49 | 1.49 | 1.49 |      |      |      |      |      |      |      |      |      |      |      |      |      |      |      |      |      |      |      |      |      |      |      |      |      |      |      |      |      |      |      |      |      |      |      |      |      |      |      |      |      |      |      |      |      |      |      |      |      |      |      |      |      |      |      |      |      |      |      |      |      |      |      |      |      |      |      |      |      |      |      |      |      |      |      |      |      |      |      |      |      |      |      |      |      |      |      |      |      |      |      |      |      |      |      |      |      |      |      |      |      |      |      |      |      |      |      |      |      |      |      |      |      |      |      |      |      |      |      |      |      |      |      |      |      |      |      |      |      |      |      |      |      |      |      |      |      |      |      |      |      |      |      |      |      |      |      |      |      |      |      |      |      |      |      |      |      |      |      |      |      |      |      |      |      |      |      |      |      |      |      |      |      |      |      |      |      |      |      |      |      |      |      |      |      |      |      |      |      |      |      |      |      |      |      |      |      |      |      |      |      |      |      |      |      |      |      |      |      |      |      |      |      |      |      |      |      |      |      |      |      |      |      |      |      |      |      |      |      |      |      |      |      |      |      |      |      |      |      |      |      |      |      |      |      |      |      |      |      |      |      |      |      |      |      |      |      |      |      |      |      |      |      |      |      |      |      |      |      |      |      |      |      |      |      |      |      |      |      |      |      |      |      |      |      |      |      |      |      |      |      |      |      |      |      |      |      |      |      |      |      |      |      |      |      |      |      |      |      |      |      |      |      |      |      |      |      |      |      |      |      |      |      |      |      |      |      |      |      |      |      |      |      |      |      |      |      |      |      |      |      |      |      |      |      |      |      |      |      |      |      |      |      |      |      |      |      |      |      |      |      |      |      |      |      |      |      |      |      |      |      |      |      |      |      |      |      |      |      |      |      |      |      |      |      |      |      |      |      |      |      |      |      |      |      |      |      |      |      |      |      |      |      |      |      |      |      |      |      |      |      |      |      |      |      |      |      |      |      |      |      |      |      |      |      |      |      |      |      |      |      |      |      |      |      |      |      |      |      |      |      |      |      |      |      |      |      |      |      |      |      |      |      |      |      |      |      |      |      |      |      |      |      |      |      |      |      |      |      |      |      |      |      |      |      |      |      |      |      |      |      |      |      |      |      |      |  |
| 0.126                          | -0.9                                                   | 1.02                         | 1.02  | 1.03  | 1.03  | 1.03  | 1.04  | 1.04  | 1.05  | 1.06  | 1.07  | 1.08  | 1.09  | 1.10  | 1.11  | 1.12  | 1.13                                                 | 1.15  | 1.17  | 1.19  | 1.21  | 1.23  | 1.26  | 1.28  | 1.30  | 1.33  | 1.35  | 1.37  | 1.39  | 1.41  | 1.43  | 1.44  | 1.46  | 1.47  | 1.48  | 1.48  | 1.49  | 1.49  | 1.49  | 1.49  | 1.49  | 1.49  | 1.49  | 1.49  | 1.49  | 1.49  | 1.49  | 1.49 | 1.49 | 1.49 | 1.49 | 1.49 | 1.49 | 1.49 | 1.49 | 1.49 |      |      |      |      |      |      |      |      |      |      |      |      |      |      |      |      |      |      |      |      |      |      |      |      |      |      |      |      |      |      |      |      |      |      |      |      |      |      |      |      |      |      |      |      |      |      |      |      |      |      |      |      |      |      |      |      |      |      |      |      |      |      |      |      |      |      |      |      |      |      |      |      |      |      |      |      |      |      |      |      |      |      |      |      |      |      |      |      |      |      |      |      |      |      |      |      |      |      |      |      |      |      |      |      |      |      |      |      |      |      |      |      |      |      |      |      |      |      |      |      |      |      |      |      |      |      |      |      |      |      |      |      |      |      |      |      |      |      |      |      |      |      |      |      |      |      |      |      |      |      |      |      |      |      |      |      |      |      |      |      |      |      |      |      |      |      |      |      |      |      |      |      |      |      |      |      |      |      |      |      |      |      |      |      |      |      |      |      |      |      |      |      |      |      |      |      |      |      |      |      |      |      |      |      |      |      |      |      |      |      |      |      |      |      |      |      |      |      |      |      |      |      |      |      |      |      |      |      |      |      |      |      |      |      |      |      |      |      |      |      |      |      |      |      |      |      |      |      |      |      |      |      |      |      |      |      |      |      |      |      |      |      |      |      |      |      |      |      |      |      |      |      |      |      |      |      |      |      |      |      |      |      |      |      |      |      |      |      |      |      |      |      |      |      |      |      |      |      |      |      |      |      |      |      |      |      |      |      |      |      |      |      |      |      |      |      |      |      |      |      |      |      |      |      |      |      |      |      |      |      |      |      |      |      |      |      |      |      |      |      |      |      |      |      |      |      |      |      |      |      |      |      |      |      |      |      |      |      |      |      |      |      |      |      |      |      |      |      |      |      |      |      |      |      |      |      |      |      |      |      |      |      |      |      |      |      |      |      |      |      |      |      |      |      |      |      |      |      |      |      |      |      |      |      |      |      |      |      |      |      |      |      |      |      |      |      |      |      |      |      |      |      |      |      |      |      |      |      |      |      |      |      |      |      |      |      |      |      |      |      |      |      |      |      |      |      |      |      |      |      |      |      |      |      |      |      |      |      |      |      |      |      |      |      |      |      |      |      |      |      |      |      |      |      |      |      |      |      |      |      |      |      |      |      |      |  |
| 0.158                          | -0.8                                                   | 1.02                         | 1.02  | 1.03  | 1.03  | 1.03  | 1.04  | 1.04  | 1.05  | 1.06  | 1.07  | 1.08  | 1.09  | 1.10  | 1.11  | 1.12  | 1.13                                                 | 1.15  | 1.17  | 1.19  | 1.20  | 1.23  | 1.25  | 1.27  | 1.30  | 1.32  | 1.35  | 1.37  | 1.39  | 1.41  | 1.43  | 1.44  | 1.46  | 1.47  | 1.48  | 1.48  | 1.49  | 1.49  | 1.49  | 1.49  | 1.49  | 1.49  | 1.49  | 1.49  | 1.49  | 1.49  | 1.49  | 1.49 | 1.49 | 1.49 | 1.49 | 1.49 | 1.49 | 1.49 | 1.49 | 1.49 | 1.49 | 1.49 | 1.49 | 1.49 |      |      |      |      |      |      |      |      |      |      |      |      |      |      |      |      |      |      |      |      |      |      |      |      |      |      |      |      |      |      |      |      |      |      |      |      |      |      |      |      |      |      |      |      |      |      |      |      |      |      |      |      |      |      |      |      |      |      |      |      |      |      |      |      |      |      |      |      |      |      |      |      |      |      |      |      |      |      |      |      |      |      |      |      |      |      |      |      |      |      |      |      |      |      |      |      |      |      |      |      |      |      |      |      |      |      |      |      |      |      |      |      |      |      |      |      |      |      |      |      |      |      |      |      |      |      |      |      |      |      |      |      |      |      |      |      |      |      |      |      |      |      |      |      |      |      |      |      |      |      |      |      |      |      |      |      |      |      |      |      |      |      |      |      |      |      |      |      |      |      |      |      |      |      |      |      |      |      |      |      |      |      |      |      |      |      |      |      |      |      |      |      |      |      |      |      |      |      |      |      |      |      |      |      |      |      |      |      |      |      |      |      |      |      |      |      |      |      |      |      |      |      |      |      |      |      |      |      |      |      |      |      |      |      |      |      |      |      |      |      |      |      |      |      |      |      |      |      |      |      |      |      |      |      |      |      |      |      |      |      |      |      |      |      |      |      |      |      |      |      |      |      |      |      |      |      |      |      |      |      |      |      |      |      |      |      |      |      |      |      |      |      |      |      |      |      |      |      |      |      |      |      |      |      |      |      |      |      |      |      |      |      |      |      |      |      |      |      |      |      |      |      |      |      |      |      |      |      |      |      |      |      |      |      |      |      |      |      |      |      |      |      |      |      |      |      |      |      |      |      |      |      |      |      |      |      |      |      |      |      |      |      |      |      |      |      |      |      |      |      |      |      |      |      |      |      |      |      |      |      |      |      |      |      |      |      |      |      |      |      |      |      |      |      |      |      |      |      |      |      |      |      |      |      |      |      |      |      |      |      |      |      |      |      |      |      |      |      |      |      |      |      |      |      |      |      |      |      |      |      |      |      |      |      |      |      |      |      |      |      |      |      |      |      |      |      |      |      |      |      |      |      |      |      |      |      |      |      |      |      |      |      |      |      |      |      |      |      |      |      |      |      |      |      |      |      |      |      |      |      |      |  |
| 0.200                          | -0.7                                                   | 1.02                         | 1.02  | 1.03  | 1.03  | 1.03  | 1.04  | 1.04  | 1.05  | 1.06  | 1.07  | 1.08  | 1.09  | 1.10  | 1.11  | 1.13  | 1.15                                                 | 1.16  | 1.18  | 1.20  | 1.22  | 1.24  | 1.26  | 1.29  | 1.31  | 1.34  | 1.36  | 1.38  | 1.40  | 1.42  | 1.44  | 1.45  | 1.46  | 1.48  | 1.48  | 1.49  | 1.49  | 1.49  | 1.49  | 1.49  | 1.49  | 1.49  | 1.49  | 1.49  | 1.49  | 1.49  | 1.49  | 1.49 | 1.49 | 1.49 | 1.49 | 1.49 | 1.49 | 1.49 | 1.49 | 1.49 | 1.49 | 1.49 | 1.49 | 1.49 | 1.49 | 1.49 | 1.49 | 1.49 | 1.49 | 1.49 | 1.49 | 1.49 | 1.49 | 1.49 | 1.49 | 1.49 | 1.49 | 1.49 | 1.49 | 1.49 | 1.49 | 1.49 | 1.49 | 1.49 | 1.49 | 1.49 | 1.49 | 1.49 | 1.49 | 1.49 | 1.49 | 1.49 | 1.49 | 1.49 | 1.49 | 1.49 | 1.49 | 1.49 | 1.49 | 1.49 | 1.49 | 1.49 | 1.49 | 1.49 | 1.49 | 1.49 | 1.49 | 1.49 | 1.49 | 1.49 | 1.49 | 1.49 | 1.49 | 1.49 | 1.49 | 1.49 | 1.49 | 1.49 | 1.49 | 1.49 | 1.49 | 1.49 | 1.49 | 1.49 | 1.49 | 1.49 | 1.49 | 1.49 | 1.49 | 1.49 | 1.49 | 1.49 | 1.49 | 1.49 | 1.49 | 1.49 | 1.49 | 1.49 | 1.49 | 1.49 | 1.49 | 1.49 | 1.49 | 1.49 | 1.49 | 1.49 | 1.49 | 1.49 | 1.49 | 1.49 | 1.49 | 1.49 | 1.49 | 1.49 | 1.49 | 1.49 | 1.49 | 1.49 | 1.49 | 1.49 | 1.49 | 1.49 | 1.49 | 1.49 | 1.49 | 1.49 | 1.49 | 1.49 | 1.49 | 1.49 | 1.49 | 1.49 | 1.49 | 1.49 | 1.49 | 1.49 | 1.49 | 1.49 | 1.49 | 1.49 | 1.49 | 1.49 | 1.49 | 1.49 | 1.49 | 1.49 | 1.49 | 1.49 | 1.49 | 1.49 | 1.49 | 1.49 | 1.49 | 1.49 | 1.49 | 1.49 | 1.49 | 1.49 | 1.49 | 1.49 | 1.49 | 1.49 | 1.49 | 1.49 | 1.49 | 1.49 | 1.49 | 1.49 | 1.49 | 1.49 | 1.49 | 1.49 | 1.49 | 1.49 | 1.49 | 1.49 | 1.49 | 1.49 | 1.49 | 1.49 | 1.49 | 1.49 | 1.49 | 1.49 | 1.49 | 1.49 | 1.49 | 1.49 | 1.49 | 1.49 | 1.49 | 1.49 | 1.49 | 1.49 | 1.49 | 1.49 | 1.49 | 1.49 | 1.49 | 1.49 | 1.49 | 1.49 | 1.49 | 1.49 | 1.49 | 1.49 | 1.49 | 1.49 | 1.49 | 1.49 | 1.49 | 1.49 | 1.49 | 1.49 | 1.49 | 1.49 | 1.49 | 1.49 | 1.49 | 1.49 | 1.49 | 1.49 | 1.49 | 1.49 | 1.49 | 1.49 | 1.49 | 1.49 | 1.49 | 1.49 | 1.49 | 1.49 | 1.49 | 1.49 | 1.49 | 1.49 | 1.49 | 1.49 | 1.49 | 1.49 | 1.49 | 1.49 | 1.49 | 1.49 | 1.49 | 1.49 | 1.49 | 1.49 | 1.49 | 1.49 | 1.49 | 1.49 | 1.49 | 1.49 | 1.49 | 1.49 | 1.49 | 1.49 | 1.49 | 1.49 | 1.49 | 1.49 | 1.49 | 1.49 | 1.49 | 1.49 | 1.49 | 1.49 | 1.49 | 1.49 | 1.49 | 1.49 | 1.49 | 1.49 | 1.49 | 1.49 | 1.49 | 1.49 | 1.49 | 1.49 | 1.49 | 1.49 | 1.49 | 1.49 | 1.49 | 1.49 | 1.49 | 1.49 | 1.49 | 1.49 | 1.49 | 1.49 | 1.49 | 1.49 | 1.49 | 1.49 | 1.49 | 1.49 | 1.49 | 1.49 | 1.49 | 1.49 | 1.49 | 1.49 | 1.49 | 1.49 | 1.49 | 1.49 | 1.49 | 1.49 | 1.49 | 1.49 | 1.49 | 1.49 | 1.49 | 1.49 | 1.49 | 1.49 | 1.49 | 1.49 | 1.49 | 1.49 | 1.49 | 1.49 | 1.49 | 1.49 | 1.49 | 1.49 | 1.49 | 1.49 | 1.49 | 1.49 | 1.49 | 1.49 | 1.49 | 1.49 | 1.49 | 1.49 | 1.49 | 1.49 | 1.49 | 1.49 | 1.49 | 1.49 | 1.49 | 1.49 | 1.49 | 1.49 | 1.49 | 1.49 | 1.49 | 1.49 | 1.49 | 1.49 | 1.49 | 1.49 | 1.49 | 1.49 | 1.49 | 1.49 | 1.49 | 1.49 | 1.49 | 1.49 | 1.49 | 1.49 | 1.49 | 1.49 | 1.49 | 1.49 | 1.49 | 1.49 | 1.49 | 1.49 | 1.49 | 1.49 | 1.49 | 1.49 | 1.49 | 1.49 | 1.49 | 1.49 | 1.49 | 1.49 | 1.49 | 1.49 | 1.49 | 1.49 | 1.49 | 1.49 | 1.49 | 1.49 | 1.49 | 1.49 | 1.49 | 1.49 | 1.49 | 1.49 | 1.49 | 1.49 | 1.49 | 1.49 | 1.49 | 1.49 | 1.49 | 1.49 | 1.49 | 1.49 | 1.49 | 1.49 | 1.49 | 1.49 | 1.49 | 1.49 | 1.49 | 1.49 | 1.49 | 1.49 | 1.49 | 1.49 | 1.49 | 1.49 | 1.49 | 1.49 | 1.49 | 1.49 | 1.49 | 1.49 | 1.49 | 1.49 | 1.49 | 1.49 | 1.49 | 1.49 | 1.49 | 1.49 | 1.49 | 1.49 | 1.49 | 1.49 | 1.49 | 1.49 | 1.49 | 1.49 | 1.49 | 1.49 | 1.49 | 1.49 | 1.49 | 1.49 | 1.49 | 1.49 | 1.49 | 1.49 | 1.49 | 1.49 | 1.49 | 1.49 | 1.49 | 1.49 | 1.49 | 1.49 | 1.49 | 1.49 | 1.49 | 1.49 | 1.49 | 1.49 | 1.49 | 1.49 | 1.49 | 1.49 | 1.49 | 1.49 | 1.49 | 1.49 | 1.49 | 1.49 | 1.49 | 1.49 | 1.49 | 1.49 | 1.49 | 1.49 | 1.49 | 1.49 | 1.49 | 1.49 | 1.49 | 1.49 | 1.49 | 1.49 | 1.49 | 1.49 | 1.49 | 1.49 | 1.49 | 1.49 | 1.49 | 1.49 | 1.49 | 1.49 | 1.49 | 1.49 | 1.49 |  |

[illegible]

| Indenter radius ratio, $R_p/R$ |      | Logarithm of indenter radius ratio, $\log_{10}(R_p/R)$ |      | Shell Thickness ratio, $h/R$                         |       |       |       |       |       |       |       |       |       |       |       |       |       |       |       |       |       |       |       |       |       |       |       |       |       |       |       |       |       |       |       |       |       |       |       |       |       |       |       |      |      |      |      |      |      |      |      |      |      |      |      |      |      |      |      |      |      |      |      |      |      |      |      |      |      |      |      |      |      |      |      |      |      |      |      |      |      |      |      |      |      |      |      |      |      |      |      |      |      |      |      |      |      |      |      |      |      |      |      |      |      |      |      |      |      |      |      |      |      |      |      |      |      |      |      |      |      |      |      |      |      |      |      |      |      |      |      |      |      |      |      |      |      |      |      |      |      |      |      |      |      |      |      |      |      |      |      |      |      |      |      |      |      |      |      |      |      |      |      |      |      |      |      |      |      |      |      |      |      |      |      |      |      |      |      |      |      |      |      |      |      |      |      |      |      |      |      |      |      |      |      |      |      |      |      |      |      |      |      |      |      |      |      |      |      |      |      |      |      |      |      |      |      |      |      |      |      |      |      |      |      |      |      |      |      |      |      |      |      |      |      |      |      |      |      |      |      |      |      |      |      |      |      |      |      |      |      |      |      |      |      |      |      |      |      |      |      |      |      |      |      |      |      |      |      |      |      |      |      |      |      |      |      |      |      |      |      |      |      |      |      |      |      |      |      |      |      |      |      |      |      |      |      |      |      |      |      |      |      |      |      |      |      |      |      |      |      |      |      |      |      |      |      |      |      |      |      |      |      |      |      |      |      |      |      |      |      |      |      |      |      |      |      |      |      |      |      |      |      |      |      |      |      |      |      |      |      |      |      |      |      |      |      |      |      |      |      |      |      |      |      |      |      |      |      |      |      |      |      |      |      |      |      |      |      |      |      |      |      |      |      |      |      |      |      |      |      |      |      |      |      |      |      |      |      |      |      |      |      |      |      |      |      |      |      |      |      |      |      |      |      |      |      |      |      |      |      |      |      |      |      |      |      |      |      |      |      |      |      |      |      |      |      |      |      |      |      |      |      |      |      |      |      |      |      |      |      |      |      |      |      |      |      |      |      |      |      |      |      |      |      |      |      |      |      |      |      |      |      |      |      |      |      |      |      |      |      |      |      |      |      |      |      |      |      |      |      |      |      |      |      |      |      |      |      |      |      |      |      |      |      |      |      |      |      |      |      |      |      |      |      |      |      |      |      |      |      |      |      |      |      |      |      |      |      |      |      |      |      |      |      |      |      |      |      |      |      |      |      |      |      |      |      |      |      |      |      |      |      |      |      |      |      |      |      |      |      |      |      |      |      |      |      |      |      |      |      |      |      |      |      |      |      |      |      |      |      |      |      |      |      |      |      |      |      |      |      |      |      |      |      |      |      |      |      |      |      |      |      |      |      |      |      |      |      |      |      |      |      |      |      |      |      |      |      |      |      |      |      |      |      |      |      |      |      |      |      |      |      |      |      |      |      |      |      |      |      |      |      |      |      |      |      |      |      |      |      |      |      |      |      |      |      |      |      |      |      |      |      |      |      |      |      |      |      |      |      |      |      |      |      |      |      |      |      |      |      |      |      |      |      |      |      |      |      |      |      |      |      |      |      |      |      |      |      |      |      |      |      |      |      |      |      |      |      |      |      |      |      |      |      |      |      |      |      |      |      |      |      |      |      |      |      |      |      |      |      |      |      |      |      |      |      |      |      |      |      |      |      |      |      |      |      |      |      |      |      |      |      |      |      |      |      |      |      |      |      |      |      |      |      |      |      |      |      |      |      |      |      |      |      |      |      |      |      |      |      |      |      |      |      |      |      |      |      |      |      |      |      |      |      |      |      |      |      |      |      |      |      |      |      |      |      |      |      |      |      |      |      |      |      |      |      |      |      |      |      |      |      |      |      |      |      |      |      |      |      |      |      |      |      |      |      |      |      |      |      |      |      |      |      |  |
|--------------------------------|------|--------------------------------------------------------|------|------------------------------------------------------|-------|-------|-------|-------|-------|-------|-------|-------|-------|-------|-------|-------|-------|-------|-------|-------|-------|-------|-------|-------|-------|-------|-------|-------|-------|-------|-------|-------|-------|-------|-------|-------|-------|-------|-------|-------|-------|-------|-------|------|------|------|------|------|------|------|------|------|------|------|------|------|------|------|------|------|------|------|------|------|------|------|------|------|------|------|------|------|------|------|------|------|------|------|------|------|------|------|------|------|------|------|------|------|------|------|------|------|------|------|------|------|------|------|------|------|------|------|------|------|------|------|------|------|------|------|------|------|------|------|------|------|------|------|------|------|------|------|------|------|------|------|------|------|------|------|------|------|------|------|------|------|------|------|------|------|------|------|------|------|------|------|------|------|------|------|------|------|------|------|------|------|------|------|------|------|------|------|------|------|------|------|------|------|------|------|------|------|------|------|------|------|------|------|------|------|------|------|------|------|------|------|------|------|------|------|------|------|------|------|------|------|------|------|------|------|------|------|------|------|------|------|------|------|------|------|------|------|------|------|------|------|------|------|------|------|------|------|------|------|------|------|------|------|------|------|------|------|------|------|------|------|------|------|------|------|------|------|------|------|------|------|------|------|------|------|------|------|------|------|------|------|------|------|------|------|------|------|------|------|------|------|------|------|------|------|------|------|------|------|------|------|------|------|------|------|------|------|------|------|------|------|------|------|------|------|------|------|------|------|------|------|------|------|------|------|------|------|------|------|------|------|------|------|------|------|------|------|------|------|------|------|------|------|------|------|------|------|------|------|------|------|------|------|------|------|------|------|------|------|------|------|------|------|------|------|------|------|------|------|------|------|------|------|------|------|------|------|------|------|------|------|------|------|------|------|------|------|------|------|------|------|------|------|------|------|------|------|------|------|------|------|------|------|------|------|------|------|------|------|------|------|------|------|------|------|------|------|------|------|------|------|------|------|------|------|------|------|------|------|------|------|------|------|------|------|------|------|------|------|------|------|------|------|------|------|------|------|------|------|------|------|------|------|------|------|------|------|------|------|------|------|------|------|------|------|------|------|------|------|------|------|------|------|------|------|------|------|------|------|------|------|------|------|------|------|------|------|------|------|------|------|------|------|------|------|------|------|------|------|------|------|------|------|------|------|------|------|------|------|------|------|------|------|------|------|------|------|------|------|------|------|------|------|------|------|------|------|------|------|------|------|------|------|------|------|------|------|------|------|------|------|------|------|------|------|------|------|------|------|------|------|------|------|------|------|------|------|------|------|------|------|------|------|------|------|------|------|------|------|------|------|------|------|------|------|------|------|------|------|------|------|------|------|------|------|------|------|------|------|------|------|------|------|------|------|------|------|------|------|------|------|------|------|------|------|------|------|------|------|------|------|------|------|------|------|------|------|------|------|------|------|------|------|------|------|------|------|------|------|------|------|------|------|------|------|------|------|------|------|------|------|------|------|------|------|------|------|------|------|------|------|------|------|------|------|------|------|------|------|------|------|------|------|------|------|------|------|------|------|------|------|------|------|------|------|------|------|------|------|------|------|------|------|------|------|------|------|------|------|------|------|------|------|------|------|------|------|------|------|------|------|------|------|------|------|------|------|------|------|------|------|------|------|------|------|------|------|------|------|------|------|------|------|------|------|------|------|------|------|------|------|------|------|------|------|------|------|------|------|------|------|------|------|------|------|------|------|------|------|------|------|------|------|------|------|------|------|------|------|------|------|------|------|------|------|------|------|------|------|------|------|------|------|------|------|------|------|------|------|------|------|------|------|------|------|------|------|------|------|------|------|------|------|------|------|------|------|------|------|------|------|------|------|------|------|------|------|------|------|------|------|------|------|------|------|------|------|------|------|------|------|------|------|------|------|------|------|------|------|------|------|------|------|------|------|------|------|------|------|------|------|------|------|------|------|------|------|------|------|------|------|------|------|------|------|------|------|------|------|------|------|------|------|------|------|------|------|------|------|------|--|
|                                |      |                                                        |      | Logarithm of shell thickness ratio, $\log_{10}(h/R)$ |       |       |       |       |       |       |       |       |       |       |       |       |       |       |       |       |       |       |       |       |       |       |       |       |       |       |       |       |       |       |       |       |       |       |       |       |       |       |       |      |      |      |      |      |      |      |      |      |      |      |      |      |      |      |      |      |      |      |      |      |      |      |      |      |      |      |      |      |      |      |      |      |      |      |      |      |      |      |      |      |      |      |      |      |      |      |      |      |      |      |      |      |      |      |      |      |      |      |      |      |      |      |      |      |      |      |      |      |      |      |      |      |      |      |      |      |      |      |      |      |      |      |      |      |      |      |      |      |      |      |      |      |      |      |      |      |      |      |      |      |      |      |      |      |      |      |      |      |      |      |      |      |      |      |      |      |      |      |      |      |      |      |      |      |      |      |      |      |      |      |      |      |      |      |      |      |      |      |      |      |      |      |      |      |      |      |      |      |      |      |      |      |      |      |      |      |      |      |      |      |      |      |      |      |      |      |      |      |      |      |      |      |      |      |      |      |      |      |      |      |      |      |      |      |      |      |      |      |      |      |      |      |      |      |      |      |      |      |      |      |      |      |      |      |      |      |      |      |      |      |      |      |      |      |      |      |      |      |      |      |      |      |      |      |      |      |      |      |      |      |      |      |      |      |      |      |      |      |      |      |      |      |      |      |      |      |      |      |      |      |      |      |      |      |      |      |      |      |      |      |      |      |      |      |      |      |      |      |      |      |      |      |      |      |      |      |      |      |      |      |      |      |      |      |      |      |      |      |      |      |      |      |      |      |      |      |      |      |      |      |      |      |      |      |      |      |      |      |      |      |      |      |      |      |      |      |      |      |      |      |      |      |      |      |      |      |      |      |      |      |      |      |      |      |      |      |      |      |      |      |      |      |      |      |      |      |      |      |      |      |      |      |      |      |      |      |      |      |      |      |      |      |      |      |      |      |      |      |      |      |      |      |      |      |      |      |      |      |      |      |      |      |      |      |      |      |      |      |      |      |      |      |      |      |      |      |      |      |      |      |      |      |      |      |      |      |      |      |      |      |      |      |      |      |      |      |      |      |      |      |      |      |      |      |      |      |      |      |      |      |      |      |      |      |      |      |      |      |      |      |      |      |      |      |      |      |      |      |      |      |      |      |      |      |      |      |      |      |      |      |      |      |      |      |      |      |      |      |      |      |      |      |      |      |      |      |      |      |      |      |      |      |      |      |      |      |      |      |      |      |      |      |      |      |      |      |      |      |      |      |      |      |      |      |      |      |      |      |      |      |      |      |      |      |      |      |      |      |      |      |      |      |      |      |      |      |      |      |      |      |      |      |      |      |      |      |      |      |      |      |      |      |      |      |      |      |      |      |      |      |      |      |      |      |      |      |      |      |      |      |      |      |      |      |      |      |      |      |      |      |      |      |      |      |      |      |      |      |      |      |      |      |      |      |      |      |      |      |      |      |      |      |      |      |      |      |      |      |      |      |      |      |      |      |      |      |      |      |      |      |      |      |      |      |      |      |      |      |      |      |      |      |      |      |      |      |      |      |      |      |      |      |      |      |      |      |      |      |      |      |      |      |      |      |      |      |      |      |      |      |      |      |      |      |      |      |      |      |      |      |      |      |      |      |      |      |      |      |      |      |      |      |      |      |      |      |      |      |      |      |      |      |      |      |      |      |      |      |      |      |      |      |      |      |      |      |      |      |      |      |      |      |      |      |      |      |      |      |      |      |      |      |      |      |      |      |      |      |      |      |      |      |      |      |      |      |      |      |      |      |      |      |      |      |      |      |      |      |      |      |      |      |      |      |      |      |      |      |      |      |      |      |      |      |      |      |      |      |      |      |      |      |      |      |      |      |      |      |      |      |      |      |      |      |      |      |      |      |      |      |      |      |      |      |      |      |      |      |      |      |      |      |      |      |      |      |      |      |      |      |      |  |
|                                |      |                                                        |      | -2.00                                                | -1.95 | -1.90 | -1.85 | -1.80 | -1.75 | -1.70 | -1.65 | -1.60 | -1.55 | -1.50 | -1.45 | -1.40 | -1.35 | -1.30 | -1.25 | -1.20 | -1.15 | -1.10 | -1.05 | -1.00 | -0.95 | -0.90 | -0.85 | -0.80 | -0.75 | -0.70 | -0.65 | -0.60 | -0.55 | -0.50 | -0.45 | -0.40 | -0.35 | -0.30 | -0.25 | -0.20 | -0.15 | -0.10 | -0.05 | 0.00 |      |      |      |      |      |      |      |      |      |      |      |      |      |      |      |      |      |      |      |      |      |      |      |      |      |      |      |      |      |      |      |      |      |      |      |      |      |      |      |      |      |      |      |      |      |      |      |      |      |      |      |      |      |      |      |      |      |      |      |      |      |      |      |      |      |      |      |      |      |      |      |      |      |      |      |      |      |      |      |      |      |      |      |      |      |      |      |      |      |      |      |      |      |      |      |      |      |      |      |      |      |      |      |      |      |      |      |      |      |      |      |      |      |      |      |      |      |      |      |      |      |      |      |      |      |      |      |      |      |      |      |      |      |      |      |      |      |      |      |      |      |      |      |      |      |      |      |      |      |      |      |      |      |      |      |      |      |      |      |      |      |      |      |      |      |      |      |      |      |      |      |      |      |      |      |      |      |      |      |      |      |      |      |      |      |      |      |      |      |      |      |      |      |      |      |      |      |      |      |      |      |      |      |      |      |      |      |      |      |      |      |      |      |      |      |      |      |      |      |      |      |      |      |      |      |      |      |      |      |      |      |      |      |      |      |      |      |      |      |      |      |      |      |      |      |      |      |      |      |      |      |      |      |      |      |      |      |      |      |      |      |      |      |      |      |      |      |      |      |      |      |      |      |      |      |      |      |      |      |      |      |      |      |      |      |      |      |      |      |      |      |      |      |      |      |      |      |      |      |      |      |      |      |      |      |      |      |      |      |      |      |      |      |      |      |      |      |      |      |      |      |      |      |      |      |      |      |      |      |      |      |      |      |      |      |      |      |      |      |      |      |      |      |      |      |      |      |      |      |      |      |      |      |      |      |      |      |      |      |      |      |      |      |      |      |      |      |      |      |      |      |      |      |      |      |      |      |      |      |      |      |      |      |      |      |      |      |      |      |      |      |      |      |      |      |      |      |      |      |      |      |      |      |      |      |      |      |      |      |      |      |      |      |      |      |      |      |      |      |      |      |      |      |      |      |      |      |      |      |      |      |      |      |      |      |      |      |      |      |      |      |      |      |      |      |      |      |      |      |      |      |      |      |      |      |      |      |      |      |      |      |      |      |      |      |      |      |      |      |      |      |      |      |      |      |      |      |      |      |      |      |      |      |      |      |      |      |      |      |      |      |      |      |      |      |      |      |      |      |      |      |      |      |      |      |      |      |      |      |      |      |      |      |      |      |      |      |      |      |      |      |      |      |      |      |      |      |      |      |      |      |      |      |      |      |      |      |      |      |      |      |      |      |      |      |      |      |      |      |      |      |      |      |      |      |      |      |      |      |      |      |      |      |      |      |      |      |      |      |      |      |      |      |      |      |      |      |      |      |      |      |      |      |      |      |      |      |      |      |      |      |      |      |      |      |      |      |      |      |      |      |      |      |      |      |      |      |      |      |      |      |      |      |      |      |      |      |      |      |      |      |      |      |      |      |      |      |      |      |      |      |      |      |      |      |      |      |      |      |      |      |      |      |      |      |      |      |      |      |      |      |      |      |      |      |      |      |      |      |      |      |      |      |      |      |      |      |      |      |      |      |      |      |      |      |      |      |      |      |      |      |      |      |      |      |      |      |      |      |      |      |      |      |      |      |      |      |      |      |      |      |      |      |      |      |      |      |      |      |      |      |      |      |      |      |      |      |      |      |      |      |      |      |      |      |      |      |      |      |      |      |      |      |      |      |      |      |      |      |      |      |      |      |      |      |      |      |      |      |      |      |      |      |      |      |      |      |      |      |      |      |      |      |      |      |      |      |      |      |      |      |      |      |      |      |      |      |      |      |      |      |      |      |      |      |      |      |      |      |      |      |      |      |      |      |      |      |      |      |      |      |  |
| 0.020                          | -1.7 | 0.96                                                   | 0.95 | 0.95                                                 | 0.94  | 0.94  | 0.93  | 0.93  | 0.92  | 0.91  | 0.91  | 0.90  | 0.89  | 0.88  | 0.87  | 0.86  | 0.84  | 0.83  | 0.82  | 0.80  | 0.77  | 0.74  | 0.71  | 0.68  | 0.65  | 0.62  | 0.58  | 0.53  | 0.49  | 0.44  | 0.40  | 0.35  | 0.30  | 0.25  | 0.22  | 0.20  | 0.17  | 0.15  | 0.12  | 0.09  |       |       |       |      |      |      |      |      |      |      |      |      |      |      |      |      |      |      |      |      |      |      |      |      |      |      |      |      |      |      |      |      |      |      |      |      |      |      |      |      |      |      |      |      |      |      |      |      |      |      |      |      |      |      |      |      |      |      |      |      |      |      |      |      |      |      |      |      |      |      |      |      |      |      |      |      |      |      |      |      |      |      |      |      |      |      |      |      |      |      |      |      |      |      |      |      |      |      |      |      |      |      |      |      |      |      |      |      |      |      |      |      |      |      |      |      |      |      |      |      |      |      |      |      |      |      |      |      |      |      |      |      |      |      |      |      |      |      |      |      |      |      |      |      |      |      |      |      |      |      |      |      |      |      |      |      |      |      |      |      |      |      |      |      |      |      |      |      |      |      |      |      |      |      |      |      |      |      |      |      |      |      |      |      |      |      |      |      |      |      |      |      |      |      |      |      |      |      |      |      |      |      |      |      |      |      |      |      |      |      |      |      |      |      |      |      |      |      |      |      |      |      |      |      |      |      |      |      |      |      |      |      |      |      |      |      |      |      |      |      |      |      |      |      |      |      |      |      |      |      |      |      |      |      |      |      |      |      |      |      |      |      |      |      |      |      |      |      |      |      |      |      |      |      |      |      |      |      |      |      |      |      |      |      |      |      |      |      |      |      |      |      |      |      |      |      |      |      |      |      |      |      |      |      |      |      |      |      |      |      |      |      |      |      |      |      |      |      |      |      |      |      |      |      |      |      |      |      |      |      |      |      |      |      |      |      |      |      |      |      |      |      |      |      |      |      |      |      |      |      |      |      |      |      |      |      |      |      |      |      |      |      |      |      |      |      |      |      |      |      |      |      |      |      |      |      |      |      |      |      |      |      |      |      |      |      |      |      |      |      |      |      |      |      |      |      |      |      |      |      |      |      |      |      |      |      |      |      |      |      |      |      |      |      |      |      |      |      |      |      |      |      |      |      |      |      |      |      |      |      |      |      |      |      |      |      |      |      |      |      |      |      |      |      |      |      |      |      |      |      |      |      |      |      |      |      |      |      |      |      |      |      |      |      |      |      |      |      |      |      |      |      |      |      |      |      |      |      |      |      |      |      |      |      |      |      |      |      |      |      |      |      |      |      |      |      |      |      |      |      |      |      |      |      |      |      |      |      |      |      |      |      |      |      |      |      |      |      |      |      |      |      |      |      |      |      |      |      |      |      |      |      |      |      |      |      |      |      |      |      |      |      |      |      |      |      |      |      |      |      |      |      |      |      |      |      |      |      |      |      |      |      |      |      |      |      |      |      |      |      |      |      |      |      |      |      |      |      |      |      |      |      |      |      |      |      |      |      |      |      |      |      |      |      |      |      |      |      |      |      |      |      |      |      |      |      |      |      |      |      |      |      |      |      |      |      |      |      |      |      |      |      |      |      |      |      |      |      |      |      |      |      |      |      |      |      |      |      |      |      |      |      |      |      |      |      |      |      |      |      |      |      |      |      |      |      |      |      |      |      |      |      |      |      |      |      |      |      |      |      |      |      |      |      |      |      |      |      |      |      |      |      |      |      |      |      |      |      |      |      |      |      |      |      |      |      |      |      |      |      |      |      |      |      |      |      |      |      |      |      |      |      |      |      |      |      |      |      |      |      |      |      |      |      |      |      |      |      |      |      |      |      |      |      |      |      |      |      |      |      |      |      |      |      |      |      |      |      |      |      |      |      |      |      |      |      |      |      |      |      |      |      |      |      |      |      |      |      |      |      |      |      |      |      |      |      |      |      |      |      |      |      |      |      |      |      |      |      |      |      |      |      |      |      |      |      |      |      |      |      |      |      |      |      |      |  |
| 0.025                          | -1.6 | 0.96                                                   | 0.96 | 0.95                                                 | 0.95  | 0.94  | 0.94  | 0.93  | 0.93  | 0.92  | 0.92  | 0.91  | 0.90  | 0.89  | 0.88  | 0.87  | 0.86  | 0.84  | 0.83  | 0.83  | 0.83  | 0.83  | 0.83  | 0.83  | 0.83  | 0.82  | 0.80  | 0.77  | 0.74  | 0.71  | 0.67  | 0.62  | 0.58  | 0.54  | 0.49  | 0.44  | 0.39  | 0.35  | 0.29  | 0.26  | 0.24  | 0.21  | 0.18  | 0.16 | 0.11 |      |      |      |      |      |      |      |      |      |      |      |      |      |      |      |      |      |      |      |      |      |      |      |      |      |      |      |      |      |      |      |      |      |      |      |      |      |      |      |      |      |      |      |      |      |      |      |      |      |      |      |      |      |      |      |      |      |      |      |      |      |      |      |      |      |      |      |      |      |      |      |      |      |      |      |      |      |      |      |      |      |      |      |      |      |      |      |      |      |      |      |      |      |      |      |      |      |      |      |      |      |      |      |      |      |      |      |      |      |      |      |      |      |      |      |      |      |      |      |      |      |      |      |      |      |      |      |      |      |      |      |      |      |      |      |      |      |      |      |      |      |      |      |      |      |      |      |      |      |      |      |      |      |      |      |      |      |      |      |      |      |      |      |      |      |      |      |      |      |      |      |      |      |      |      |      |      |      |      |      |      |      |      |      |      |      |      |      |      |      |      |      |      |      |      |      |      |      |      |      |      |      |      |      |      |      |      |      |      |      |      |      |      |      |      |      |      |      |      |      |      |      |      |      |      |      |      |      |      |      |      |      |      |      |      |      |      |      |      |      |      |      |      |      |      |      |      |      |      |      |      |      |      |      |      |      |      |      |      |      |      |      |      |      |      |      |      |      |      |      |      |      |      |      |      |      |      |      |      |      |      |      |      |      |      |      |      |      |      |      |      |      |      |      |      |      |      |      |      |      |      |      |      |      |      |      |      |      |      |      |      |      |      |      |      |      |      |      |      |      |      |      |      |      |      |      |      |      |      |      |      |      |      |      |      |      |      |      |      |      |      |      |      |      |      |      |      |      |      |      |      |      |      |      |      |      |      |      |      |      |      |      |      |      |      |      |      |      |      |      |      |      |      |      |      |      |      |      |      |      |      |      |      |      |      |      |      |      |      |      |      |      |      |      |      |      |      |      |      |      |      |      |      |      |      |      |      |      |      |      |      |      |      |      |      |      |      |      |      |      |      |      |      |      |      |      |      |      |      |      |      |      |      |      |      |      |      |      |      |      |      |      |      |      |      |      |      |      |      |      |      |      |      |      |      |      |      |      |      |      |      |      |      |      |      |      |      |      |      |      |      |      |      |      |      |      |      |      |      |      |      |      |      |      |      |      |      |      |      |      |      |      |      |      |      |      |      |      |      |      |      |      |      |      |      |      |      |      |      |      |      |      |      |      |      |      |      |      |      |      |      |      |      |      |      |      |      |      |      |      |      |      |      |      |      |      |      |      |      |      |      |      |      |      |      |      |      |      |      |      |      |      |      |      |      |      |      |      |      |      |      |      |      |      |      |      |      |      |      |      |      |      |      |      |      |      |      |      |      |      |      |      |      |      |      |      |      |      |      |      |      |      |      |      |      |      |      |      |      |      |      |      |      |      |      |      |      |      |      |      |      |      |      |      |      |      |      |      |      |      |      |      |      |      |      |      |      |      |      |      |      |      |      |      |      |      |      |      |      |      |      |      |      |      |      |      |      |      |      |      |      |      |      |      |      |      |      |      |      |      |      |      |      |      |      |      |      |      |      |      |      |      |      |      |      |      |      |      |      |      |      |      |      |      |      |      |      |      |      |      |      |      |      |      |      |      |      |      |      |      |      |      |      |      |      |      |      |      |      |      |      |      |      |      |      |      |      |      |      |      |      |      |      |      |      |      |      |      |      |      |      |      |      |      |      |      |      |      |      |      |      |      |      |      |      |      |      |      |      |      |      |      |      |      |      |      |      |      |      |      |      |      |      |      |      |      |      |      |      |      |      |      |      |      |      |      |      |      |      |      |      |      |      |      |      |      |      |      |      |      |      |      |      |      |      |      |      |      |      |      |  |
| 0.032                          | -1.5 | 0.96                                                   | 0.96 | 0.95                                                 | 0.95  | 0.94  | 0.94  | 0.94  | 0.93  | 0.92  | 0.92  | 0.91  | 0.90  | 0.89  | 0.88  | 0.87  | 0.86  | 0.84  | 0.83  | 0.85  | 0.82  | 0.79  | 0.75  | 0.72  | 0.69  | 0.66  | 0.62  | 0.58  | 0.54  | 0.49  | 0.44  | 0.39  | 0.33  | 0.30  | 0.27  | 0.25  | 0.22  | 0.21  | 0.18  | 0.16  | 0.12  |       |       |      |      |      |      |      |      |      |      |      |      |      |      |      |      |      |      |      |      |      |      |      |      |      |      |      |      |      |      |      |      |      |      |      |      |      |      |      |      |      |      |      |      |      |      |      |      |      |      |      |      |      |      |      |      |      |      |      |      |      |      |      |      |      |      |      |      |      |      |      |      |      |      |      |      |      |      |      |      |      |      |      |      |      |      |      |      |      |      |      |      |      |      |      |      |      |      |      |      |      |      |      |      |      |      |      |      |      |      |      |      |      |      |      |      |      |      |      |      |      |      |      |      |      |      |      |      |      |      |      |      |      |      |      |      |      |      |      |      |      |      |      |      |      |      |      |      |      |      |      |      |      |      |      |      |      |      |      |      |      |      |      |      |      |      |      |      |      |      |      |      |      |      |      |      |      |      |      |      |      |      |      |      |      |      |      |      |      |      |      |      |      |      |      |      |      |      |      |      |      |      |      |      |      |      |      |      |      |      |      |      |      |      |      |      |      |      |      |      |      |      |      |      |      |      |      |      |      |      |      |      |      |      |      |      |      |      |      |      |      |      |      |      |      |      |      |      |      |      |      |      |      |      |      |      |      |      |      |      |      |      |      |      |      |      |      |      |      |      |      |      |      |      |      |      |      |      |      |      |      |      |      |      |      |      |      |      |      |      |      |      |      |      |      |      |      |      |      |      |      |      |      |      |      |      |      |      |      |      |      |      |      |      |      |      |      |      |      |      |      |      |      |      |      |      |      |      |      |      |      |      |      |      |      |      |      |      |      |      |      |      |      |      |      |      |      |      |      |      |      |      |      |      |      |      |      |      |      |      |      |      |      |      |      |      |      |      |      |      |      |      |      |      |      |      |      |      |      |      |      |      |      |      |      |      |      |      |      |      |      |      |      |      |      |      |      |      |      |      |      |      |      |      |      |      |      |      |      |      |      |      |      |      |      |      |      |      |      |      |      |      |      |      |      |      |      |      |      |      |      |      |      |      |      |      |      |      |      |      |      |      |      |      |      |      |      |      |      |      |      |      |      |      |      |      |      |      |      |      |      |      |      |      |      |      |      |      |      |      |      |      |      |      |      |      |      |      |      |      |      |      |      |      |      |      |      |      |      |      |      |      |      |      |      |      |      |      |      |      |      |      |      |      |      |      |      |      |      |      |      |      |      |      |      |      |      |      |      |      |      |      |      |      |      |      |      |      |      |      |      |      |      |      |      |      |      |      |      |      |      |      |      |      |      |      |      |      |      |      |      |      |      |      |      |      |      |      |      |      |      |      |      |      |      |      |      |      |      |      |      |      |      |      |      |      |      |      |      |      |      |      |      |      |      |      |      |      |      |      |      |      |      |      |      |      |      |      |      |      |      |      |      |      |      |      |      |      |      |      |      |      |      |      |      |      |      |      |      |      |      |      |      |      |      |      |      |      |      |      |      |      |      |      |      |      |      |      |      |      |      |      |      |      |      |      |      |      |      |      |      |      |      |      |      |      |      |      |      |      |      |      |      |      |      |      |      |      |      |      |      |      |      |      |      |      |      |      |      |      |      |      |      |      |      |      |      |      |      |      |      |      |      |      |      |      |      |      |      |      |      |      |      |      |      |      |      |      |      |      |      |      |      |      |      |      |      |      |      |      |      |      |      |      |      |      |      |      |      |      |      |      |      |      |      |      |      |      |      |      |      |      |      |      |      |      |      |      |      |      |      |      |      |      |      |      |      |      |      |      |      |      |      |      |      |      |      |      |      |      |      |      |      |      |      |      |      |      |      |      |      |      |      |      |      |      |      |      |      |      |      |      |      |      |      |      |      |      |      |      |      |      |      |      |  |
| 0.040                          | -1.4 | 0.96                                                   | 0.96 | 0.95                                                 | 0.95  | 0.95  | 0.94  | 0.94  | 0.93  | 0.92  | 0.91  | 0.91  | 0.90  | 0.90  | 0.89  | 0.88  | 0.87  | 0.87  | 0.87  | 0.87  | 0.87  | 0.87  | 0.87  | 0.87  | 0.87  | 0.87  | 0.87  | 0.87  | 0.87  | 0.87  | 0.87  | 0.87  | 0.87  | 0.87  | 0.87  | 0.87  | 0.87  | 0.87  | 0.87  | 0.87  | 0.87  | 0.87  | 0.87  | 0.87 | 0.87 | 0.87 | 0.87 | 0.87 | 0.87 | 0.87 | 0.87 | 0.87 | 0.87 | 0.87 | 0.87 | 0.87 | 0.87 | 0.87 | 0.87 | 0.87 | 0.87 | 0.87 | 0.87 | 0.87 | 0.87 | 0.87 | 0.87 | 0.87 | 0.87 | 0.87 | 0.87 | 0.87 | 0.87 | 0.87 | 0.87 | 0.87 | 0.87 | 0.87 | 0.87 | 0.87 | 0.87 | 0.87 | 0.87 | 0.87 | 0.87 | 0.87 | 0.87 | 0.87 | 0.87 | 0.87 | 0.87 | 0.87 | 0.87 | 0.87 | 0.87 | 0.87 | 0.87 | 0.87 | 0.87 | 0.87 | 0.87 | 0.87 | 0.87 | 0.87 | 0.87 | 0.87 | 0.87 | 0.87 | 0.87 | 0.87 | 0.87 | 0.87 | 0.87 | 0.87 | 0.87 | 0.87 | 0.87 | 0.87 | 0.87 | 0.87 | 0.87 | 0.87 | 0.87 | 0.87 | 0.87 | 0.87 | 0.87 | 0.87 | 0.87 | 0.87 | 0.87 | 0.87 | 0.87 | 0.87 | 0.87 | 0.87 | 0.87 | 0.87 | 0.87 | 0.87 | 0.87 | 0.87 | 0.87 | 0.87 | 0.87 | 0.87 | 0.87 | 0.87 | 0.87 | 0.87 | 0.87 | 0.87 | 0.87 | 0.87 | 0.87 | 0.87 | 0.87 | 0.87 | 0.87 | 0.87 | 0.87 | 0.87 | 0.87 | 0.87 | 0.87 | 0.87 | 0.87 | 0.87 | 0.87 | 0.87 | 0.87 | 0.87 | 0.87 | 0.87 | 0.87 | 0.87 | 0.87 | 0.87 | 0.87 | 0.87 | 0.87 | 0.87 | 0.87 | 0.87 | 0.87 | 0.87 | 0.87 | 0.87 | 0.87 | 0.87 | 0.87 | 0.87 | 0.87 | 0.87 | 0.87 | 0.87 | 0.87 | 0.87 | 0.87 | 0.87 | 0.87 | 0.87 | 0.87 | 0.87 | 0.87 | 0.87 | 0.87 | 0.87 | 0.87 | 0.87 | 0.87 | 0.87 | 0.87 | 0.87 | 0.87 | 0.87 | 0.87 | 0.87 | 0.87 | 0.87 | 0.87 | 0.87 | 0.87 | 0.87 | 0.87 | 0.87 | 0.87 | 0.87 | 0.87 | 0.87 | 0.87 | 0.87 | 0.87 | 0.87 | 0.87 | 0.87 | 0.87 | 0.87 | 0.87 | 0.87 | 0.87 | 0.87 | 0.87 | 0.87 | 0.87 | 0.87 | 0.87 | 0.87 | 0.87 | 0.87 | 0.87 | 0.87 | 0.87 | 0.87 | 0.87 | 0.87 | 0.87 | 0.87 | 0.87 | 0.87 | 0.87 | 0.87 | 0.87 | 0.87 | 0.87 | 0.87 | 0.87 | 0.87 | 0.87 | 0.87 | 0.87 | 0.87 | 0.87 | 0.87 | 0.87 | 0.87 | 0.87 | 0.87 | 0.87 | 0.87 | 0.87 | 0.87 | 0.87 | 0.87 | 0.87 | 0.87 | 0.87 | 0.87 | 0.87 | 0.87 | 0.87 | 0.87 | 0.87 | 0.87 | 0.87 | 0.87 | 0.87 | 0.87 | 0.87 | 0.87 | 0.87 | 0.87 | 0.87 | 0.87 | 0.87 | 0.87 | 0.87 | 0.87 | 0.87 | 0.87 | 0.87 | 0.87 | 0.87 | 0.87 | 0.87 | 0.87 | 0.87 | 0.87 | 0.87 | 0.87 | 0.87 | 0.87 | 0.87 | 0.87 | 0.87 | 0.87 | 0.87 | 0.87 | 0.87 | 0.87 | 0.87 | 0.87 | 0.87 | 0.87 | 0.87 | 0.87 | 0.87 | 0.87 | 0.87 | 0.87 | 0.87 | 0.87 | 0.87 | 0.87 | 0.87 | 0.87 | 0.87 | 0.87 | 0.87 | 0.87 | 0.87 | 0.87 | 0.87 | 0.87 | 0.87 | 0.87 | 0.87 | 0.87 | 0.87 | 0.87 | 0.87 | 0.87 | 0.87 | 0.87 | 0.87 | 0.87 | 0.87 | 0.87 | 0.87 | 0.87 | 0.87 | 0.87 | 0.87 | 0.87 | 0.87 | 0.87 | 0.87 | 0.87 | 0.87 | 0.87 | 0.87 | 0.87 | 0.87 | 0.87 | 0.87 | 0.87 | 0.87 | 0.87 | 0.87 | 0.87 | 0.87 | 0.87 | 0.87 | 0.87 | 0.87 | 0.87 | 0.87 | 0.87 | 0.87 | 0.87 | 0.87 | 0.87 | 0.87 | 0.87 | 0.87 | 0.87 | 0.87 | 0.87 | 0.87 | 0.87 | 0.87 | 0.87 | 0.87 | 0.87 | 0.87 | 0.87 | 0.87 | 0.87 | 0.87 | 0.87 | 0.87 | 0.87 | 0.87 | 0.87 | 0.87 | 0.87 | 0.87 | 0.87 | 0.87 | 0.87 | 0.87 | 0.87 | 0.87 | 0.87 | 0.87 | 0.87 | 0.87 | 0.87 | 0.87 | 0.87 | 0.87 | 0.87 | 0.87 | 0.87 | 0.87 | 0.87 | 0.87 | 0.87 | 0.87 | 0.87 | 0.87 | 0.87 | 0.87 | 0.87 | 0.87 | 0.87 | 0.87 | 0.87 | 0.87 | 0.87 | 0.87 | 0.87 | 0.87 | 0.87 | 0.87 | 0.87 | 0.87 | 0.87 | 0.87 | 0.87 | 0.87 | 0.87 | 0.87 | 0.87 | 0.87 | 0.87 | 0.87 | 0.87 | 0.87 | 0.87 | 0.87 | 0.87 | 0.87 | 0.87 | 0.87 | 0.87 | 0.87 | 0.87 | 0.87 | 0.87 | 0.87 | 0.87 | 0.87 | 0.87 | 0.87 | 0.87 | 0.87 | 0.87 | 0.87 | 0.87 | 0.87 | 0.87 | 0.87 | 0.87 | 0.87 | 0.87 | 0.87 | 0.87 | 0.87 | 0.87 | 0.87 | 0.87 | 0.87 | 0.87 | 0.87 | 0.87 | 0.87 | 0.87 | 0.87 | 0.87 | 0.87 | 0.87 | 0.87 | 0.87 | 0.87 | 0.87 | 0.87 | 0.87 | 0.87 | 0.87 | 0.87 | 0.87 | 0.87 | 0.87 | 0.87 | 0.87 | 0.87 | 0.87 | 0.87 | 0.87 | 0.87 | 0.87 | 0.87 | 0.87 | 0.87 | 0.87 | 0.87 | 0.87 | 0.87 | 0.87 | 0.87 | 0.87 | 0.87 | 0.87 | 0.87 | 0.87 | 0.87 | 0.87 | 0.87 | 0.87 | 0.87 | 0.87 | 0.87 | 0.87 | 0.87 | 0.87 | 0.87 | 0.87 | 0.87 | 0.87 | 0.87 | 0.87 | 0.87 | 0.87 | 0.87 | 0.87 | 0.87 | 0.87 | 0.87 | 0.87 | 0.87 | 0.87 | 0.87 | 0.87 | 0.87 | 0.87 | 0.87 | 0.87 | 0.87 | 0.87 | 0.87 | 0.87 | 0.87 | 0.87 | 0.87 | 0.87 | 0.87 | 0.87 | 0.87 | 0.87 | 0.87 | 0.87 | 0.87 | 0.87 | 0.87 | 0.87 | 0.87 | 0.87 | 0.87 | 0.87 | 0.87 | 0.87 | 0.87 | 0.87 | 0.87 | 0.87 | 0.87 | 0.87 | 0.87 | 0.87 | 0.87 | 0.87 | 0.87 | 0.87 | 0.87 | 0.87 | 0.87 | 0.87 | 0.87 | 0.87 | 0.87 | 0.87 | 0.87 | 0.87 | 0.87 | 0.87 | 0.87 | 0.87 | 0.87 | 0.87 | 0.87 | 0.87 | 0.87 | 0.87 | 0.87 | 0.87 | 0.87 | 0.87 | 0.87 | 0.87 | 0.87 | 0.87 | 0.87 | 0.87 | 0.87 | 0.87 | 0.87 | 0.87 | 0.87 | 0.87 | 0.87 | 0.87 | 0.87 | 0.87 | 0.87 | 0.87 | 0.87 | 0.87 | 0.87 | 0.87 | 0.87 | 0.87 | 0.87 | 0.87 | 0.87 | 0.87 | 0.87 | 0.87 | 0.87 | 0.87 | 0.87 | 0.87 | 0.87 | 0.87 | 0.87 | 0.87 | 0.87 | 0.87 | 0.87 | 0.87 | 0.87 | 0.87 | 0.87 | 0.87 | 0.87 | 0.87 | 0.87 | 0.87 | 0.87 | 0.87 | 0.87 | 0.87 | 0.87 | 0.87 | 0.87 | 0.87 | 0.87 | 0.87 | 0.87 | 0.87 | 0.87 | 0.87 | 0.87 | 0.87 | 0.87 | 0.87 | 0.87 | 0.87 | 0.87 | 0.87 | 0.87 | 0.87 | 0.87 | 0.87 | 0.87 | 0.87 | 0.87 | 0.87 | 0.87 | 0.87 | 0.87 | 0.87 | 0.87 | 0.87 | 0.87 | 0.87 | 0.87 | 0.87 | 0.87 | 0.87 | 0.87 | 0.87 | 0.87 | 0.87 | 0.87 | 0.87 | 0.87 | 0.87 | 0.87 | 0.87 | 0.87 | 0.87 | 0.87 | 0.87 | 0.87 | 0.87 | 0.87 | 0.87 | 0.87 | 0.87 | 0.87 | 0.87 | 0.87 | 0.87 | 0.87 | 0.87 | 0.87 | 0.87 | 0.87 | 0.87 | 0.87 | 0.87 | 0.87 | 0.87 | 0.87 | 0.87 | 0.87 | 0.87 | 0.87 | 0.87 | 0.87 | 0.87 | 0.87 | 0.87 | 0.87 | 0.87 | 0.87 | 0.87 | 0.87 | 0.87 | 0.87 | 0.87 | 0.87 | 0.87 | 0.87 | 0.87 | 0.87 | 0.87 | 0.87 | 0.87 | 0.87 | 0.87 | 0.87 | 0.87 | 0.87 | 0.87 | 0.87 | 0.87 | 0.87 | 0.87 | 0.87 | 0.87 | 0.87 | 0.87 | 0.87 | 0.87 | 0.87 | 0.87 | 0.87 | 0.87 | 0.87 | 0.87 | 0.87 | 0.87 | 0.87 | 0.87 | 0.87 | 0.87 | 0.87 | 0.87 | 0.87 | 0.87 | 0.87 | 0.87 | 0.87 | 0.87 | 0.87 | 0.87 | 0.87 | 0.87 | 0.87 | 0.87 | 0.87 | 0.87 | 0.87 |  |

[illegible]

|                                |                                                        | Shell Thickness ratio, $h/R$                         |       |       |       |       |       |       |       |       |       |       |       |       |       |       |       |       |       |       |       |       |       |       |       |       |       |       |       |       |       |       |       |       |       |       |       |       |       |        |       |       |      |      |
|--------------------------------|--------------------------------------------------------|------------------------------------------------------|-------|-------|-------|-------|-------|-------|-------|-------|-------|-------|-------|-------|-------|-------|-------|-------|-------|-------|-------|-------|-------|-------|-------|-------|-------|-------|-------|-------|-------|-------|-------|-------|-------|-------|-------|-------|-------|--------|-------|-------|------|------|
|                                |                                                        | 0.010                                                | 0.011 | 0.013 | 0.014 | 0.016 | 0.018 | 0.020 | 0.022 | 0.025 | 0.028 | 0.032 | 0.035 | 0.040 | 0.045 | 0.050 | 0.056 | 0.063 | 0.071 | 0.079 | 0.089 | 0.100 | 0.112 | 0.126 | 0.141 | 0.158 | 0.178 | 0.200 | 0.224 | 0.251 | 0.282 | 0.316 | 0.355 | 0.398 | 0.447 | 0.501 | 0.562 | 0.631 | 0.708 | 0.794  | 0.891 | 1.000 |      |      |
| Indenter radius ratio, $R_0/R$ | Logarithm of indenter radius ratio, $\log_{10}(R_0/R)$ | Logarithm of shell thickness ratio, $\log_{10}(h/R)$ |       |       |       |       |       |       |       |       |       |       |       |       |       |       |       |       |       |       |       |       |       |       |       |       |       |       |       |       |       |       |       |       |       |       |       |       |       |        |       |       |      |      |
|                                |                                                        | -2.00                                                | -1.95 | -1.90 | -1.85 | -1.80 | -1.75 | -1.70 | -1.65 | -1.60 | -1.55 | -1.50 | -1.45 | -1.40 | -1.35 | -1.30 | -1.25 | -1.20 | -1.15 | -1.10 | -1.05 | -1.00 | -0.95 | -0.90 | -0.85 | -0.80 | -0.75 | -0.70 | -0.65 | -0.60 | -0.55 | -0.50 | -0.45 | -0.40 | -0.35 | -0.30 | -0.25 | -0.20 | -0.15 | -0.10  | -0.05 | 0.00  |      |      |
| 0.020                          | -1.7                                                   | 0.96                                                 | 0.95  | 0.95  | 0.94  | 0.94  | 0.93  | 0.92  | 0.92  | 0.91  | 0.90  | 0.89  | 0.88  | 0.87  | 0.86  | 0.85  | 0.84  | 0.82  | 0.80  | 0.78  | 0.76  | 0.72  | 0.68  | 0.64  | 0.61  | 0.58  | 0.55  | 0.51  | 0.48  | 0.44  | 0.40  | 0.36  | 0.31  | 0.27  | 0.23  | 0.20  | 0.18  | 0.16  | 0.13  | 0.11   | 0.08  |       |      |      |
| 0.025                          | -1.6                                                   | 0.96                                                 | 0.95  | 0.95  | 0.94  | 0.94  | 0.93  | 0.93  | 0.92  | 0.91  | 0.90  | 0.89  | 0.88  | 0.87  | 0.86  | 0.85  | 0.83  | 0.81  | 0.79  | 0.77  | 0.75  | 0.71  | 0.67  | 0.63  | 0.60  | 0.56  | 0.53  | 0.49  | 0.45  | 0.41  | 0.36  | 0.32  | 0.27  | 0.24  | 0.22  | 0.19  | 0.17  | 0.14  | 0.10  |        |       |       |      |      |
| 0.032                          | -1.5                                                   | 0.96                                                 | 0.96  | 0.95  | 0.95  | 0.94  | 0.94  | 0.93  | 0.93  | 0.92  | 0.91  | 0.90  | 0.89  | 0.88  | 0.88  | 0.86  | 0.85  | 0.83  | 0.81  | 0.82  | 0.78  | 0.74  | 0.72  | 0.69  | 0.65  | 0.61  | 0.58  | 0.54  | 0.50  | 0.46  | 0.41  | 0.37  | 0.30  | 0.28  | 0.25  | 0.23  | 0.21  | 0.16  | 0.11  |        |       |       |      |      |
| 0.040                          | -1.4                                                   | 0.96                                                 | 0.96  | 0.95  | 0.95  | 0.94  | 0.94  | 0.94  | 0.93  | 0.92  | 0.91  | 0.91  | 0.90  | 0.89  | 0.89  | 0.88  | 0.86  | 0.84  | 0.84  | 0.85  | 0.81  | 0.78  | 0.77  | 0.74  | 0.71  | 0.67  | 0.63  | 0.59  | 0.55  | 0.51  | 0.46  | 0.40  | 0.34  | 0.32  | 0.29  | 0.27  | 0.23  | 0.18  | 0.13  |        |       |       |      |      |
| 0.050                          | -1.3                                                   | 0.97                                                 | 0.96  | 0.96  | 0.95  | 0.95  | 0.94  | 0.94  | 0.93  | 0.92  | 0.91  | 0.91  | 0.90  | 0.89  | 0.89  | 0.88  | 0.86  | 0.84  | 0.84  | 0.83  | 0.84  | 0.85  | 0.81  | 0.79  | 0.76  | 0.72  | 0.68  | 0.64  | 0.60  | 0.56  | 0.50  | 0.44  | 0.38  | 0.35  | 0.33  | 0.29  | 0.25  | 0.20  | 0.15  |        |       |       |      |      |
| 0.063                          | -1.2                                                   | 0.97                                                 | 0.96  | 0.96  | 0.95  | 0.95  | 0.94  | 0.93  | 0.93  | 0.92  | 0.91  | 0.91  | 0.90  | 0.89  | 0.89  | 0.88  | 0.86  | 0.84  | 0.84  | 0.83  | 0.84  | 0.85  | 0.81  | 0.79  | 0.76  | 0.72  | 0.68  | 0.64  | 0.60  | 0.56  | 0.50  | 0.44  | 0.38  | 0.35  | 0.33  | 0.29  | 0.25  | 0.20  | 0.15  |        |       |       |      |      |
| 0.079                          | -1.1                                                   | 0.97                                                 | 0.97  | 0.96  | 0.96  | 0.96  | 0.95  | 0.94  | 0.94  | 0.93  | 0.92  | 0.92  | 0.91  | 0.90  | 0.90  | 0.89  | 0.87  | 0.86  | 0.84  | 0.84  | 0.83  | 0.84  | 0.85  | 0.81  | 0.79  | 0.76  | 0.72  | 0.68  | 0.64  | 0.60  | 0.56  | 0.50  | 0.44  | 0.38  | 0.35  | 0.33  | 0.29  | 0.24  | 0.19  |        |       |       |      |      |
| 0.100                          | -1                                                     | 0.97                                                 | 0.97  | 0.97  | 0.96  | 0.96  | 0.96  | 0.95  | 0.95  | 0.95  | 0.94  | 0.94  | 0.93  | 0.93  | 0.92  | 0.92  | 0.91  | 0.89  | 0.86  | 0.84  | 0.84  | 0.83  | 0.84  | 0.85  | 0.81  | 0.79  | 0.76  | 0.72  | 0.68  | 0.64  | 0.60  | 0.56  | 0.50  | 0.44  | 0.38  | 0.35  | 0.33  | 0.29  | 0.24  | 0.19   |       |       |      |      |
| 0.126                          | -0.9                                                   | 0.97                                                 | 0.97  | 0.97  | 0.96  | 0.96  | 0.96  | 0.96  | 0.95  | 0.95  | 0.95  | 0.94  | 0.94  | 0.93  | 0.93  | 0.92  | 0.92  | 0.91  | 0.89  | 0.86  | 0.84  | 0.84  | 0.83  | 0.84  | 0.85  | 0.81  | 0.79  | 0.76  | 0.72  | 0.68  | 0.64  | 0.60  | 0.56  | 0.50  | 0.44  | 0.38  | 0.35  | 0.33  | 0.29  | 0.24   | 0.19  |       |      |      |
| 0.158                          | -0.8                                                   | 0.98                                                 | 0.98  | 0.97  | 0.97  | 0.97  | 0.97  | 0.97  | 0.97  | 0.97  | 0.97  | 0.97  | 0.97  | 0.96  | 0.96  | 0.96  | 0.96  | 0.96  | 0.96  | 0.95  | 0.96  | 0.96  | 0.96  | 0.95  | 0.93  | 0.92  | 0.88  | 0.83  | 0.79  | 0.74  | 0.68  | 0.62  | 0.55  | 0.49  | 0.44  | 0.39  | 0.34  | 0.29  | 0.24  | 0.19   |       |       |      |      |
| 0.200                          | -0.7                                                   | 0.98                                                 | 0.98  | 0.98  | 0.98  | 0.98  | 0.98  | 0.98  | 0.98  | 0.98  | 0.98  | 0.98  | 0.98  | 0.98  | 0.98  | 0.98  | 0.98  | 0.98  | 0.98  | 0.98  | 0.99  | 1.00  | 1.01  | 1.03  | 1.02  | 1.05  | 1.01  | 0.96  | 0.97  | 0.95  | 0.89  | 0.83  | 0.78  | 0.73  | 0.68  | 0.63  | 0.59  | 0.52  | 0.42  | 0.32   |       |       |      |      |
| 0.251                          | -0.6                                                   | 0.99                                                 | 0.99  | 0.98  | 0.98  | 0.98  | 0.98  | 0.98  | 0.98  | 0.98  | 0.99  | 0.99  | 0.99  | 0.99  | 0.98  | 0.98  | 0.98  | 0.99  | 0.99  | 0.99  | 1.00  | 1.02  | 1.03  | 1.05  | 1.04  | 1.05  | 1.08  | 1.04  | 1.01  | 1.02  | 1.00  | 0.94  | 0.88  | 0.84  | 0.79  | 0.75  | 0.70  | 0.65  | 0.55  | 0.45   | 0.35  |       |      |      |
| 0.316                          | -0.5                                                   | 0.99                                                 | 0.99  | 0.98  | 0.98  | 0.98  | 0.98  | 0.98  | 0.98  | 0.98  | 0.99  | 0.99  | 0.99  | 0.99  | 0.99  | 0.99  | 0.99  | 0.99  | 0.99  | 0.99  | 1.00  | 1.02  | 1.03  | 1.05  | 1.04  | 1.05  | 1.08  | 1.04  | 1.01  | 1.02  | 1.00  | 0.94  | 0.88  | 0.84  | 0.79  | 0.75  | 0.70  | 0.65  | 0.55  | 0.45   | 0.35  |       |      |      |
| 0.398                          | -0.4                                                   | 0.99                                                 | 0.99  | 0.99  | 0.98  | 0.98  | 0.98  | 0.98  | 0.98  | 0.99  | 0.99  | 0.99  | 0.99  | 0.99  | 0.99  | 0.99  | 0.99  | 0.99  | 0.99  | 0.99  | 1.00  | 1.02  | 1.03  | 1.05  | 1.04  | 1.05  | 1.08  | 1.04  | 1.01  | 1.02  | 1.00  | 0.94  | 0.88  | 0.84  | 0.79  | 0.75  | 0.70  | 0.65  | 0.55  | 0.45   | 0.35  |       |      |      |
| 0.501                          | -0.3                                                   | 0.99                                                 | 0.99  | 0.99  | 0.99  | 0.99  | 0.99  | 0.99  | 0.99  | 0.99  | 0.99  | 0.99  | 0.99  | 0.99  | 0.99  | 0.99  | 0.99  | 0.99  | 0.99  | 0.99  | 1.00  | 1.03  | 1.04  | 1.07  | 1.09  | 1.08  | 1.11  | 1.14  | 1.10  | 1.11  | 1.13  | 1.11  | 1.06  | 1.00  | 0.96  | 0.92  | 0.87  | 0.81  | 0.71  | 0.61   | 0.51  | 0.41  |      |      |
| 0.631                          | -0.2                                                   | 1.00                                                 | 0.99  | 0.99  | 0.99  | 0.99  | 0.99  | 0.99  | 0.99  | 1.00  | 1.00  | 1.00  | 1.00  | 1.00  | 1.00  | 1.00  | 1.00  | 1.00  | 1.00  | 1.01  | 1.03  | 1.04  | 1.05  | 1.06  | 1.09  | 1.11  | 1.14  | 1.10  | 1.11  | 1.13  | 1.11  | 1.07  | 1.02  | 0.98  | 0.93  | 0.84  | 0.74  | 0.64  | 0.54  | 0.44   |       |       |      |      |
| 0.794                          | -0.1                                                   | 1.00                                                 | 1.00  | 1.00  | 1.00  | 1.00  | 1.00  | 1.00  | 1.00  | 1.00  | 1.00  | 1.00  | 1.01  | 1.01  | 1.01  | 1.01  | 1.01  | 1.01  | 1.01  | 1.02  | 1.04  | 1.05  | 1.06  | 1.08  | 1.10  | 1.12  | 1.15  | 1.18  | 1.21  | 1.20  | 1.23  | 1.21  | 1.17  | 1.13  | 1.08  | 1.04  | 0.97  | 0.87  | 0.77  | 0.67   | 0.57  | 0.47  |      |      |
| 1.000                          | 0                                                      | 1.00                                                 | 1.00  | 1.00  | 1.00  | 1.00  | 1.00  | 1.00  | 1.00  | 1.01  | 1.01  | 1.01  | 1.01  | 1.01  | 1.01  | 1.02  | 1.02  | 1.03  | 1.04  | 1.05  | 1.06  | 1.07  | 1.08  | 1.10  | 1.12  | 1.15  | 1.18  | 1.21  | 1.24  | 1.25  | 1.27  | 1.29  | 1.27  | 1.19  | 1.14  | 1.10  | 1.00  | 0.80  | 0.70  | 0.60   | 0.50  |       |      |      |
| 1.259                          | 0.1                                                    | 1.01                                                 | 1.01  | 1.01  | 1.01  | 1.01  | 1.01  | 1.01  | 1.01  | 1.01  | 1.02  | 1.02  | 1.03  | 1.03  | 1.03  | 1.04  | 1.05  | 1.06  | 1.07  | 1.08  | 1.09  | 1.10  | 1.11  | 1.13  | 1.15  | 1.18  | 1.22  | 1.25  | 1.28  | 1.30  | 1.31  | 1.30  | 1.26  | 1.21  | 1.17  | 1.14  | 1.04  | 0.94  | 0.84  | 0.74   | 0.64  | 0.53  |      |      |
| 1.995                          | 0.3                                                    | 1.02                                                 | 1.02  | 1.02  | 1.02  | 1.02  | 1.02  | 1.03  | 1.03  | 1.03  | 1.03  | 1.03  | 1.03  | 1.03  | 1.03  | 1.03  | 1.04  | 1.05  | 1.06  | 1.07  | 1.08  | 1.09  | 1.10  | 1.11  | 1.13  | 1.16  | 1.20  | 1.23  | 1.26  | 1.31  | 1.32  | 1.34  | 1.33  | 1.28  | 1.24  | 1.20  | 1.19  | 1.09  | 0.99  | 0.89   | 0.79  | 0.67  | 0.55 |      |
| 2.512                          | 0.4                                                    | 1.03                                                 | 1.03  | 1.03  | 1.03  | 1.03  | 1.03  | 1.03  | 1.03  | 1.04  | 1.04  | 1.04  | 1.04  | 1.04  | 1.04  | 1.04  | 1.05  | 1.06  | 1.07  | 1.08  | 1.09  | 1.10  | 1.11  | 1.13  | 1.16  | 1.20  | 1.23  | 1.26  | 1.33  | 1.36  | 1.38  | 1.39  | 1.38  | 1.34  | 1.31  | 1.27  | 1.25  | 1.23  | 1.13  | 1.03   | 0.93  | 0.82  | 0.70 | 0.58 |
| 3.162                          | 0.5                                                    | 1.03                                                 | 1.03  | 1.03  | 1.04  | 1.04  | 1.04  | 1.04  | 1.04  | 1.04  | 1.04  | 1.04  | 1.04  | 1.04  | 1.05  | 1.05  | 1.05  | 1.05  | 1.06  | 1.07  | 1.08  | 1.09  | 1.10  | 1.11  | 1.13  | 1.16  | 1.20  | 1.24  | 1.29  | 1.33  | 1.37  | 1.42  | 1.46  | 1.46  | 1.44  | 1.43  | 1.41  | 1.29  | 1.17  | 1.05   | 0.93  | 0.81  | 0.69 |      |
| 3.981                          | 0.6                                                    | 1.04                                                 | 1.04  | 1.04  | 1.04  | 1.04  | 1.05  | 1.05  | 1.05  | 1.05  | 1.05  | 1.05  | 1.05  | 1.05  | 1.05  | 1.05  | 1.05  | 1.06  | 1.07  | 1.08  | 1.09  | 1.10  | 1.11  | 1.13  | 1.16  | 1.20  | 1.24  | 1.29  | 1.33  | 1.37  | 1.42  | 1.46  | 1.46  | 1.44  | 1.43  | 1.41  | 1.29  | 1.17  | 1.05  | 0.93   | 0.81  | 0.69  |      |      |
| 5.012                          | 0.7                                                    | 1.05                                                 | 1.05  | 1.05  | 1.05  | 1.05  | 1.05  | 1.05  | 1.05  | 1.05  | 1.05  | 1.05  | 1.05  | 1.05  | 1.05  | 1.05  | 1.05  | 1.06  | 1.07  | 1.08  | 1.09  | 1.10  | 1.11  | 1.13  | 1.16  | 1.20  | 1.24  | 1.29  | 1.33  | 1.37  | 1.42  | 1.46  | 1.46  | 1.44  | 1.43  | 1.41  | 1.29  | 1.17  | 1.05  | 0.93   | 0.81  | 0.69  |      |      |
| 6.310                          | 0.8                                                    | 1.04                                                 | 1.05  | 1.05  | 1.05  | 1.05  | 1.05  | 1.05  | 1.05  | 1.05  | 1.05  | 1.05  | 1.05  | 1.05  | 1.05  | 1.05  | 1.05  | 1.06  | 1.07  | 1.08  | 1.09  | 1.10  | 1.11  | 1.13  | 1.16  | 1.20  | 1.24  | 1.29  | 1.33  | 1.38  | 1.42  | 1.46  | 1.46  | 1.44  | 1.43  | 1.41  | 1.29  | 1.17  | 1.05  | 0.93   | 0.81  | 0.69  |      |      |
| 7.943                          | 0.9                                                    | 1.04                                                 | 1.04  | 1.04  | 1.05  | 1.05  | 1.05  | 1.05  | 1.05  | 1.05  | 1.05  | 1.05  | 1.05  | 1.05  | 1.05  | 1.05  | 1.05  | 1.06  | 1.07  | 1.08  | 1.09  | 1.10  | 1.11  | 1.13  | 1.16  | 1.20  | 1.25  | 1.29  | 1.33  | 1.38  | 1.42  | 1.46  | 1.46  | 1.45  | 1.43  | 1.42  | 1.30  | 1.18  | 1.06  | 0.94   | 0.81  | 0.69  |      |      |
| 10.000                         | 1                                                      | 1.04                                                 | 1.04  | 1.04  | 1.04  | 1.04  | 1.05  | 1.05  | 1.05  | 1.05  | 1.05  | 1.05  | 1.05  | 1.05  | 1.05  | 1.05  | 1.05  | 1.06  | 1.07  | 1.08  | 1.09  | 1.10  | 1.11  | 1.13  | 1.16  | 1.20  | 1.25  | 1.29  | 1.33  | 1.38  | 1.42  | 1.46  | 1.46  | 1.45  | 1.43  | 1.42  | 1.30  | 1.18  | 1.06  | 0.94   | 0.82  | 0.69  |      |      |
| 15.849                         | 1.2                                                    | 1.04                                                 | 1.04  | 1.04  | 1.04  | 1.04  | 1.04  | 1.04  | 1.04  | 1.04  | 1.04  | 1.04  | 1.04  | 1.04  | 1.04  | 1.04  | 1.04  | 1.04  | 1.04  | 1.04  | 1.04  | 1.04  | 1.04  | 1.04  | 1.04  | 1.04  | 1.04  | 1.04  | 1.04  | 1.04  | 1.04  | 1.04  | 1.04  | 1.04  | 1.04  | 1.04  | 1.04  | 1.04  | 1.04  | 1.04   | 0.94  | 0.82  | 0.69 |      |
| 19.953                         | 1.3                                                    | 1.04                                                 | 1.04  | 1.04  | 1.04  | 1.04  | 1.04  | 1.04  | 1.04  | 1.04  | 1.04  | 1.04  | 1.04  | 1.04  | 1.04  | 1.04  | 1.04  | 1.04  | 1.04  | 1.04  | 1.04  | 1.04  | 1.04  | 1.04  | 1.04  | 1.04  | 1.04  | 1.04  | 1.04  | 1.04  | 1.04  | 1.04  | 1.04  | 1.04  | 1.04  | 1.04  | 1.04  | 1.04  | 1.04  | 1.04   | 0.94  | 0.82  | 0.69 |      |
| 25.119                         | 1.4                                                    | 1.04                                                 | 1.04  | 1.04  | 1.04  | 1.04  | 1.04  | 1.04  | 1.04  | 1.04  | 1.04  | 1.04  | 1.04  | 1.04  | 1.04  | 1.04  | 1.04  | 1.04  | 1.04  | 1.04  | 1.04  | 1.04  | 1.04  | 1.04  | 1.04  | 1.04  | 1.04  | 1.04  | 1.04  | 1.04  | 1.04  | 1.04  | 1.04  | 1.04  | 1.04  | 1.04  | 1.04  | 1.04  | 1.04  | 1.04</ |       |       |      |      |
